# Supplementary material for: Frustrated Lewis pair-ligated tetrelenes
Source: Royal Society of Chemistry journal article supplement (doi:10.1039/d2dt03807b), 2022-12-20
Supplement: d2dt03807b2.pdf [file d2dt03807b2.pdf]

## Supporting Information

### Frustrated Lewis Pair-Ligated Tetrelenes

Alvaro A. Omaña,<sup>a</sup> Brandon L. Frenette,<sup>a</sup> Eike Dornsiepen,<sup>a</sup> Ryo Kobayashi,<sup>b</sup> Michael J. Ferguson,<sup>a</sup> Takeaki Iwamoto,<sup>b</sup> and Eric Rivard<sup>a,\*</sup>

<sup>a</sup>*Department of Chemistry, University of Alberta, 11227 Saskatchewan Drive, Edmonton, Alberta, Canada T6G 2G2*

<sup>b</sup>*Department of Chemistry, Graduate School of Science, Tohoku University, Aoba-ku, Sendai 980-8578, Japan*

### Table of Contents

|                                                       |     |
|-------------------------------------------------------|-----|
| 1. Single crystal X-ray structure determinations..... | S2  |
| 2. NMR Spectra.....                                   | S7  |
| 3. Density functional theory (DFT) computations.....  | S41 |
| 4. References .....                                   | S45 |

## 1. Single crystal X-ray structure determinations

Appropriate X-ray quality crystals were coated with a small amount of hydrocarbon oil (Paratone-N) and removed from the glovebox in a vial. Crystals were quickly mounted onto a glass fiber and placed in a low temperature stream of nitrogen on the X-ray diffractometer. All data was collected using a Bruker APEX II CCD detector/D8 or PLATFORM diffractometer using Mo K $\alpha$  (0.71073 Å) or Cu K $\alpha$  (1.54178 Å) radiation, with the crystals cooled to -80 °C or -100 °C. For [<sup>i</sup>Pr<sub>2</sub>PCH<sub>2</sub>(C<sub>6</sub>H<sub>4</sub>)BMes<sub>2</sub>{CH<sub>2</sub>}] (**13**), 45 second exposures were needed to collect high quality crystallographic data. The data was corrected for absorption through Gaussian integration from the indexing of crystal faces.<sup>51</sup> Crystal structures were solved using intrinsic phasing (SHELXT)<sup>52</sup> and refined using SHELXL-2014.<sup>53</sup> For [PB{CH<sub>2</sub>}] (**7**), [{(THF)<sub>3</sub>Li}<sup>i</sup>PrP(C<sub>6</sub>H<sub>4</sub>)BCy<sub>2</sub>{CH<sub>2</sub>}] (**8**), [<sup>i</sup>Pr<sub>2</sub>PCH<sub>2</sub>(C<sub>6</sub>H<sub>4</sub>)Li(OEt<sub>2</sub>)<sub>2</sub>] (**10**), <sup>CH<sub>2</sub></sup>PB and [<sup>i</sup>Pr<sub>2</sub>PCH<sub>2</sub>(C<sub>6</sub>H<sub>4</sub>)BMes<sub>2</sub>{CH<sub>2</sub>}] (**13**), Olex2 was used as a Graphical User Interface (GUI).<sup>54</sup> The assignment of hydrogen atom positions are based on the *sp*<sup>2</sup>- or *sp*<sup>3</sup>-hybridization geometries of their attached carbon atoms and were given thermal parameters 20 % greater than those of their parent atoms. Molecular structures are shown with thermal ellipsoids at a 30% probability and have been generated using SHELXP. All crystallographic information files (.cifs) were deposited within the Cambridge Crystallographic Data Centre (CCDC) database.

**Table S1.** X-ray crystallographic data for [PB{SiBr<sub>2</sub>}] (5), [PB{AgOTf}]<sub>2</sub>, and [PB{CH<sub>2</sub>}] (7).

| Compound                                                       | <b>5</b>                                             | <b>[PB{AgOTf}]<sub>2</sub></b>                                                                                             | <b>7</b>                           |
|----------------------------------------------------------------|------------------------------------------------------|----------------------------------------------------------------------------------------------------------------------------|------------------------------------|
| Formula                                                        | C <sub>24</sub> H <sub>40</sub> BBR <sub>2</sub> PSi | C <sub>64</sub> H <sub>96</sub> Ag <sub>2</sub> B <sub>2</sub> F <sub>6</sub> O <sub>6</sub> P <sub>2</sub> S <sub>2</sub> | C <sub>25</sub> H <sub>42</sub> BP |
| Formula weight                                                 | 558.25                                               | 1438.82                                                                                                                    | 384.36                             |
| Crystal system                                                 | Monoclinic                                           | Triclinic                                                                                                                  | Monoclinic                         |
| Space group                                                    | <i>P2<sub>1</sub>/c</i> (No. 14)                     | <i>P1̄</i> (No. 2)                                                                                                         | <i>P2<sub>1</sub>/c</i> (No. 14)   |
| Crystal dimensions (mm)                                        | 0.15×0.12×0.06                                       | 0.17×0.15×0.04                                                                                                             | 0.154×0.113×0.045                  |
| <i>a</i> (Å)                                                   | 9.9653(2)                                            | 11.0509(3)                                                                                                                 | 10.5854(3)                         |
| <i>b</i> (Å)                                                   | 15.4219(4)                                           | 11.8386(3)                                                                                                                 | 9.8043(2)                          |
| <i>c</i> (Å)                                                   | 17.1801(4)                                           | 14.3836(4)                                                                                                                 | 22.5734(5)                         |
| α (°)                                                          | 90                                                   | 99.1129(11)                                                                                                                | 90                                 |
| β (°)                                                          | 105.5652(13)                                         | 105.9672(11)                                                                                                               | 91.2950(10)                        |
| γ (°)                                                          | 90                                                   | 108.6188(9)                                                                                                                | 90                                 |
| <i>V</i> (Å <sup>3</sup> )                                     | 2586.70(10)                                          | 1650.69(8)                                                                                                                 | 2342.12(10)                        |
| <i>Z</i>                                                       | 4                                                    | 1                                                                                                                          | 4                                  |
| ρ (g/cm <sup>3</sup> )                                         | 1.433                                                | 1.447                                                                                                                      | 1.090                              |
| Abs coeff (mm <sup>-1</sup> )                                  | 5.053                                                | 6.350                                                                                                                      | 1.058                              |
| <i>T</i> (°C)                                                  | −100                                                 | −100                                                                                                                       | −80                                |
| 2θ <sub>max</sub> (°)                                          | 140.41                                               | 148.16                                                                                                                     | 147.81                             |
| Total data                                                     | 13910                                                | 72300                                                                                                                      | 88291                              |
| Unique data                                                    | 4905 (0.0260)                                        | 6441 (0.0333)                                                                                                              | 4607 (0.0637)                      |
| Obs data [ <i>I</i> >2σ( <i>I</i> )] <sup>a</sup>              | 4172                                                 | 6261                                                                                                                       | 4070                               |
| Params                                                         | 262                                                  | 445 <sup>b</sup>                                                                                                           | 496 <sup>c,d</sup>                 |
| <i>R</i> <sub>1</sub> [ <i>I</i> >2σ( <i>I</i> )] <sup>a</sup> | 0.0444 <sup>a</sup>                                  | 0.0263 <sup>b</sup>                                                                                                        | 0.0479 <sup>c,d</sup>              |
| <i>wR</i> <sub>2</sub> [all data] <sup>a</sup>                 | 0.1394                                               | 0.0725                                                                                                                     | 0.1356                             |
| Max/min Δρ (e <sup>-</sup> Å <sup>-3</sup> )                   | 1.441/−1.029                                         | 0.770/−0.521                                                                                                               | 0.87/−0.34                         |

$$^a R_1 = \sum ||F_o| - |F_c|| / \sum |F_o|; wR_2 = [\sum w(F_o^2 - F_c^2)^2 / \sum w(F_o^4)]^{1/2}.$$

<sup>b</sup>The disordered cyclohexyl group (atoms C21A to C26A and C21B to C26B) were restrained to have approximately the same bond lengths by using the SHELXL **SADI** instruction on the following: B1–C21A and B1–C21B; all C–C distances. Additionally, the anisotropic displacement parameters were restrained by use of the SHELXL **SIMU** instruction. Finally, the disordered solvent toluene molecule was constrained to have an idealized phenyl group, the methyl carbon to *ipso*-carbon distance was restrained to be approximately 1.50 Å by use of a SHELXL **DFIX** instruction, and the angles about the *ipso* carbon atoms were restrained to be approximately 120°. Further, the anisotropic displacement parameters of carbon atoms of the major orientation of the toluene were restrained by use of the SHELXL **RIGU** instruction.

<sup>c</sup>Data were collected with the detector set at three different positions. Low-angle (detector 2θ = −33°) data frames were collected using a scan time of 5 s, medium-angle (detector 2θ = 75°) frames using a scan time of 5 s, and high-angle (detector 2θ = 117°) frames using a scan time of 10 s.

<sup>d</sup>Due to whole molecule disorder, molecule was split into two parts (using **PART** keywords); both refined anisotropically. **SIMU**, **RIGU** and **DELU** restraints were added, alongside **SAME** P1 > C25.

**Table S2.** X-ray crystallographic data for  $[\{(THF)_3Li\}PrP(C_6H_4)BCy_2\{CH_2\}]$  (**8**),  $[Pr_2PCH_2(C_6H_4)Li(Et_2O)]_2$  (**10**), and  $CH_2PB$ .

| Compound                                                       | <b>8</b>                                                 | <b>10•Et<sub>2</sub>O</b>                                                        | <b>CH<sub>2</sub>PB</b>            |
|----------------------------------------------------------------|----------------------------------------------------------|----------------------------------------------------------------------------------|------------------------------------|
| Formula                                                        | C <sub>34</sub> H <sub>59</sub> BLiO <sub>3</sub> P      | C <sub>34</sub> H <sub>56.34</sub> Li <sub>2</sub> O <sub>2</sub> P <sub>2</sub> | C <sub>25</sub> H <sub>42</sub> BP |
| Formula weight                                                 | 564.53                                                   | 572.95                                                                           | 384.36                             |
| Crystal system                                                 | Orthorhombic                                             | Monoclinic                                                                       | Monoclinic                         |
| Space group                                                    | <i>P2<sub>1</sub>2<sub>1</sub>2<sub>1</sub></i> (No. 19) | <i>P2<sub>1</sub>/n</i>                                                          | <i>P2<sub>1</sub>/c</i> (No. 14)   |
| Crystal dimensions (mm)                                        | 0.235×0.173×0.132                                        | 0.174×0.147×0.061                                                                | 0.065×0.164×0.253                  |
| <i>a</i> (Å)                                                   | 9.9428(10)                                               | 12.7778(6)                                                                       | 10.7112(4)                         |
| <i>b</i> (Å)                                                   | 16.8849(17)                                              | 18.1916(8)                                                                       | 11.6101(4)                         |
| <i>c</i> (Å)                                                   | 20.512(2)                                                | 15.8870(7)                                                                       | 18.4751(6)                         |
| α (°)                                                          | 90                                                       | 90                                                                               | 90                                 |
| β (°)                                                          | 90                                                       | 95.1640(10)                                                                      | 90.8680(10)                        |
| γ (°)                                                          | 90                                                       | 90                                                                               | 90                                 |
| <i>V</i> (Å <sup>3</sup> )                                     | 3443.6(6)                                                | 3676.1(3)                                                                        | 2297.28(14)                        |
| <i>Z</i>                                                       | 4                                                        | 4                                                                                | 4                                  |
| ρ (g/cm <sup>3</sup> )                                         | 1.089                                                    | 1.043                                                                            | 1.111                              |
| Abs coeff (mm <sup>-1</sup> )                                  | 0.110                                                    | 0.144                                                                            | 0.127                              |
| <i>T</i> (°C)                                                  | -80                                                      | -100                                                                             | -100                               |
| 2θ <sub>max</sub> (°)                                          | 102.76                                                   | 102.9                                                                            | 107.6                              |
| Total data                                                     | 28282                                                    | 56424                                                                            | 26118                              |
| Unique data                                                    | 6531 (0.0730)                                            | 7023 (0.0715)                                                                    | 4835 (0.0397)                      |
| Obs data [ <i>I</i> >2σ( <i>I</i> )] <sup>a</sup>              | 4451                                                     | 7023                                                                             | 3947                               |
| Params                                                         | 410 <sup>c</sup>                                         | 393 <sup>b</sup>                                                                 | 248                                |
| <i>R</i> <sub>1</sub> [ <i>I</i> >2σ( <i>I</i> )] <sup>a</sup> | 0.0579 <sup>d</sup>                                      | 0.0607 <sup>b</sup>                                                              | 0.0377                             |
| <i>wR</i> <sub>2</sub> [all data] <sup>a</sup>                 | 0.1595                                                   | 0.1769 <sup>b</sup>                                                              | 0.0997                             |
| Max/min Δρ (e <sup>-</sup> Å <sup>-3</sup> )                   | 0.42/-0.26                                               | 0.74/-0.48                                                                       | 0.31/-0.22                         |

$$^a R_1 = \sum ||F_o| - |F_c|| / \sum |F_o|; wR_2 = [\sum w(F_o^2 - F_c^2)^2 / \sum w(F_o^4)]^{1/2}.$$

<sup>b</sup>The disorder in the coordinated Et<sub>2</sub>O solvent molecules for **10** could not be fully resolved by splitting into parts, as they are disordered over more than three locations. Thus, only **SIMU**, **RIGU**, **DELU** restraints were applied to the Et<sub>2</sub>O molecules.

<sup>c</sup>Due to disordered THF molecules, **RIGU**, **SADI** and **EADP** restraints were used for C23 to C26, C31 to C34.

<sup>d</sup>Refined as an inversion twin:  $l_c = (1-x)l_s^+ + xl_s^-$ . The Flack parameter (*x*) was determined to be 0.29(19); therefore, the absolute configuration of **9** cannot be conclusively determined and it must be considered a racemic mixture.

**Table S3.** X-ray crystallographic data for [<sup>i</sup>Pr<sub>2</sub>PCH<sub>2</sub>(C<sub>6</sub>H<sub>4</sub>)BMes<sub>2</sub>{CH<sub>2</sub>}] (**13**):

|                                                                |                                    |
|----------------------------------------------------------------|------------------------------------|
| Compound                                                       | <b>13</b>                          |
| Formula                                                        | C <sub>32</sub> H <sub>44</sub> BP |
| Formula weight                                                 | 470.45                             |
| Crystal system                                                 | Monoclinic                         |
| Space group                                                    | <i>P2<sub>1</sub>/n</i>            |
| Crystal dimensions (mm)                                        | 0.213×0.196×0.170                  |
| <i>a</i> (Å)                                                   | 10.230(2)                          |
| <i>b</i> (Å)                                                   | 19.008(4)                          |
| <i>c</i> (Å)                                                   | 14.985(4)                          |
| α (°)                                                          | 90                                 |
| β (°)                                                          | 102.935(4)                         |
| γ (°)                                                          | 90                                 |
| <i>V</i> (Å <sup>3</sup> )                                     | 2840.0(12)                         |
| <i>Z</i>                                                       | 4                                  |
| ρ (g/cm <sup>3</sup> )                                         | 1.100                              |
| Abs coeff (mm <sup>-1</sup> )                                  | 0.114                              |
| <i>T</i> (°C)                                                  | −80                                |
| 2θ <sub>max</sub> (°)                                          | 104.4                              |
| Total data                                                     | 22944                              |
| Unique data                                                    | 5632 (0.0430)                      |
| Obs data [ <i>I</i> >2σ( <i>I</i> )] <sup>a</sup>              | 5632                               |
| Params                                                         | 393 <sup>b</sup>                   |
| <i>R</i> <sub>1</sub> [ <i>I</i> >2σ( <i>I</i> )] <sup>a</sup> | 0.0486                             |
| <i>wR</i> <sub>2</sub> [all data] <sup>a</sup>                 | 0.1226                             |
| Max/min Δρ (e <sup>-</sup> Å <sup>-3</sup> )                   | 0.39/−0.24                         |

$${}^a R_1 = \frac{\sum ||F_o| - |F_c||}{\sum |F_o|}; wR_2 = [\sum w(F_o^2 - F_c^2)^2 / \sum w(F_o^4)]^{1/2}.$$

<sup>b</sup>Disorder within one of the mesityl rings (C15 – C23) was modeled by splitting into two parts, and the site occupancies [*s.o.f.* 0.612(18)] were determined using an isotropic model and freely refined. Atom distances within the disordered mesityl ring were restrained to be approximately equal with the **SADI** command; displacement parameters were also restrained using the enhanced rigid bond restraint (**RIGU**).

## 2. NMR Spectra

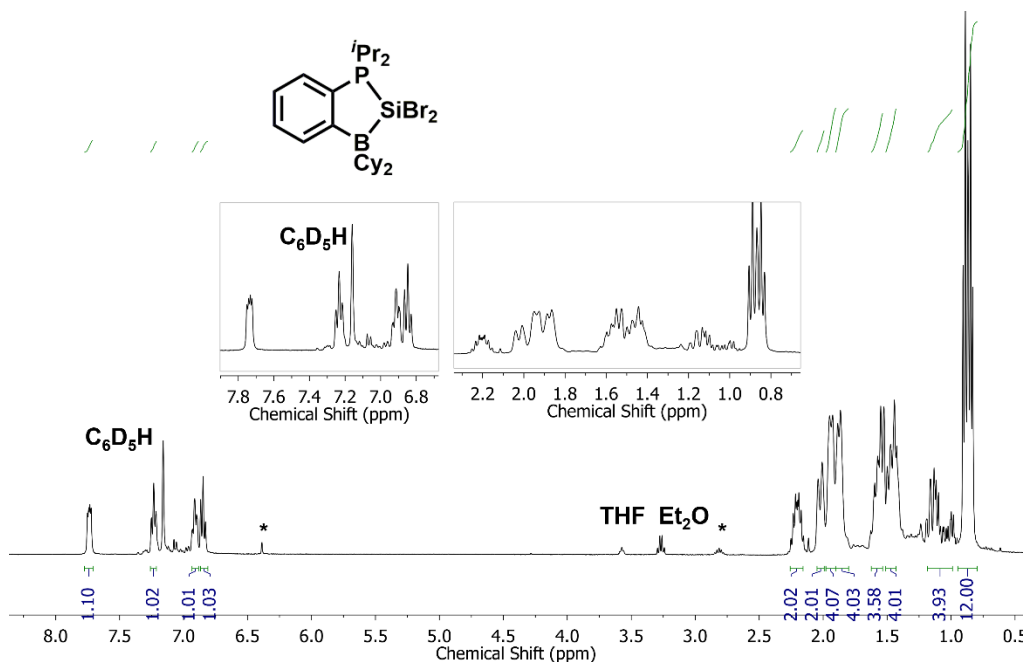

**Figure S1.**  $^1H$  NMR spectrum of  $[PB\{SiBr_2\}]$  (5) in  $C_6D_6$ . Peaks labelled with an asterisk (\*) are consistent with the literature data for  $IPr\bullet SiBr_2$ .<sup>55</sup>

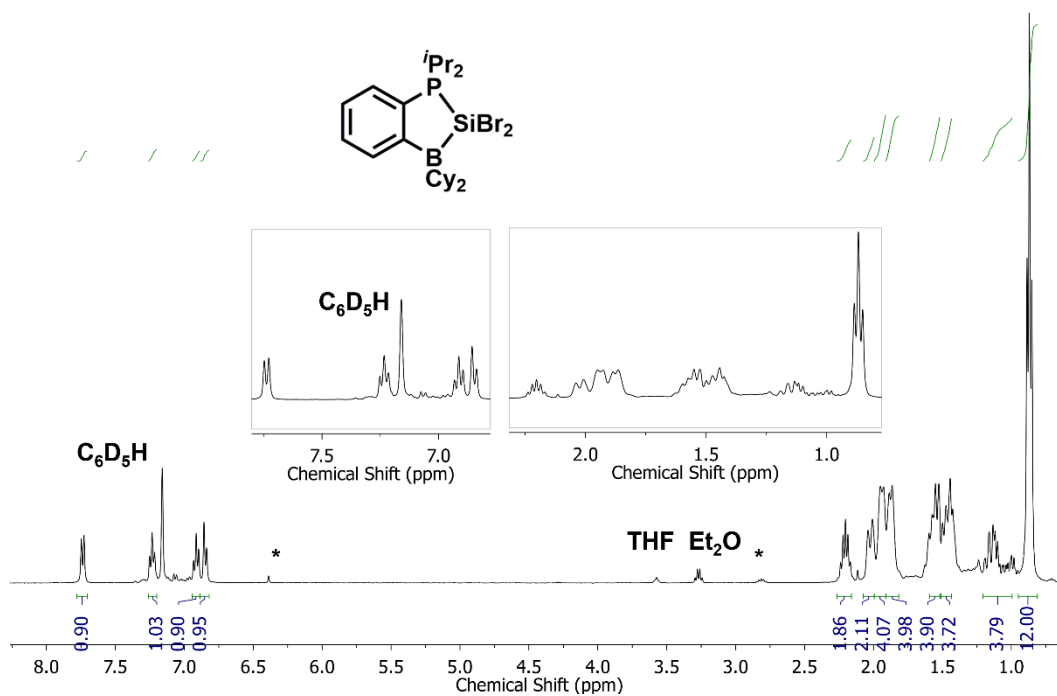

**Figure S2.**  $^1H\{^{31}P\}$  NMR spectrum of  $[PB\{SiBr_2\}]$  (5) in  $C_6D_6$ . Peaks labelled with an asterisk (\*) are consistent with the literature data for  $IPr\bullet SiBr_2$ .<sup>55</sup>

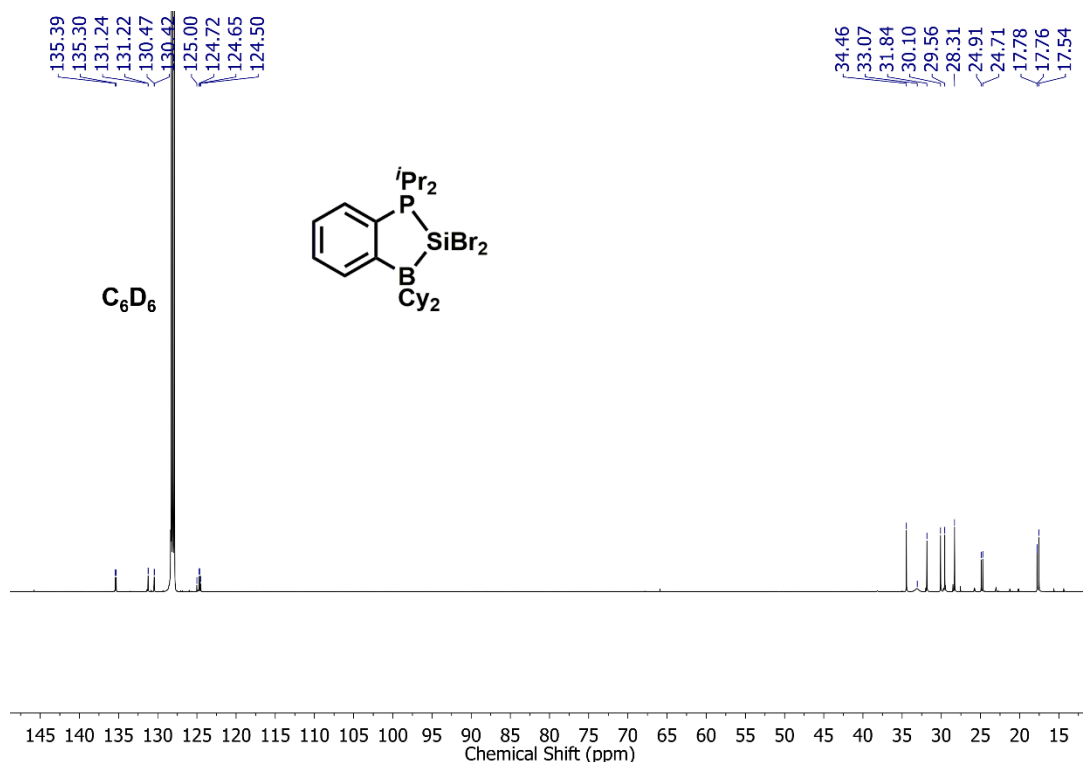

Figure S3.  $^{13}C\{^1H\}$  NMR spectrum of  $[PB\{SiBr_2\}]$  (**5**) in  $C_6D_6$ .

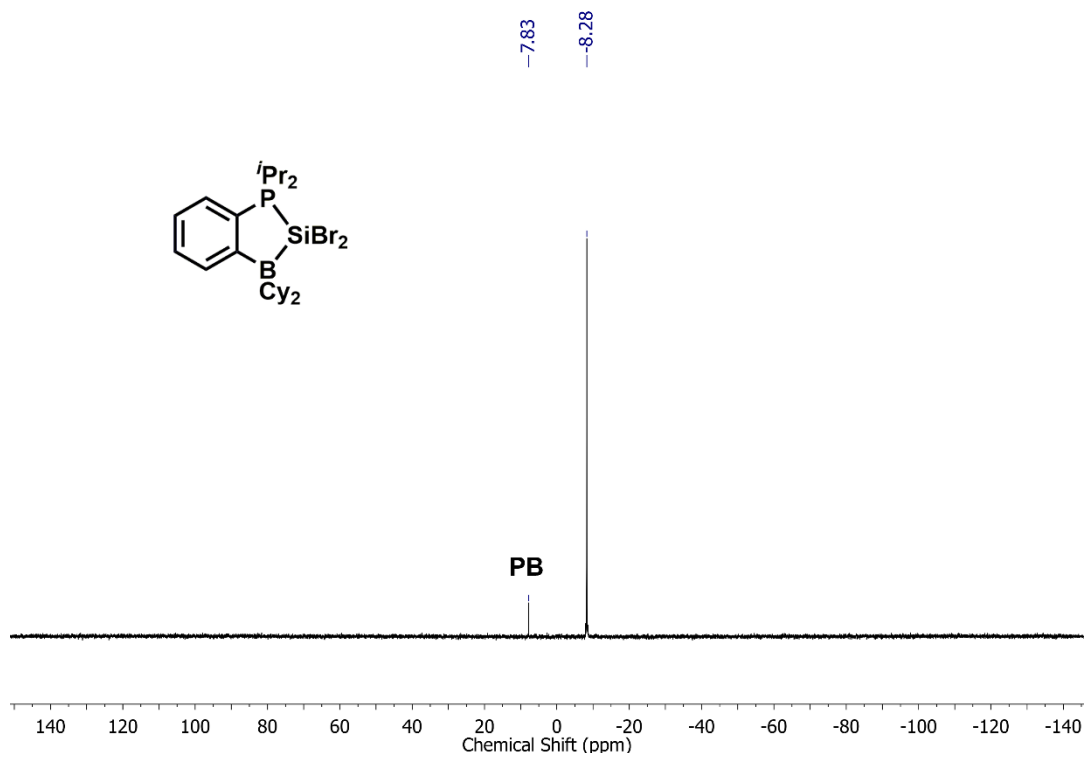

Figure S4.  $^{31}P\{^1H\}$  NMR spectrum of  $[PB\{SiBr_2\}]$  (**5**) in  $C_6D_6$ .



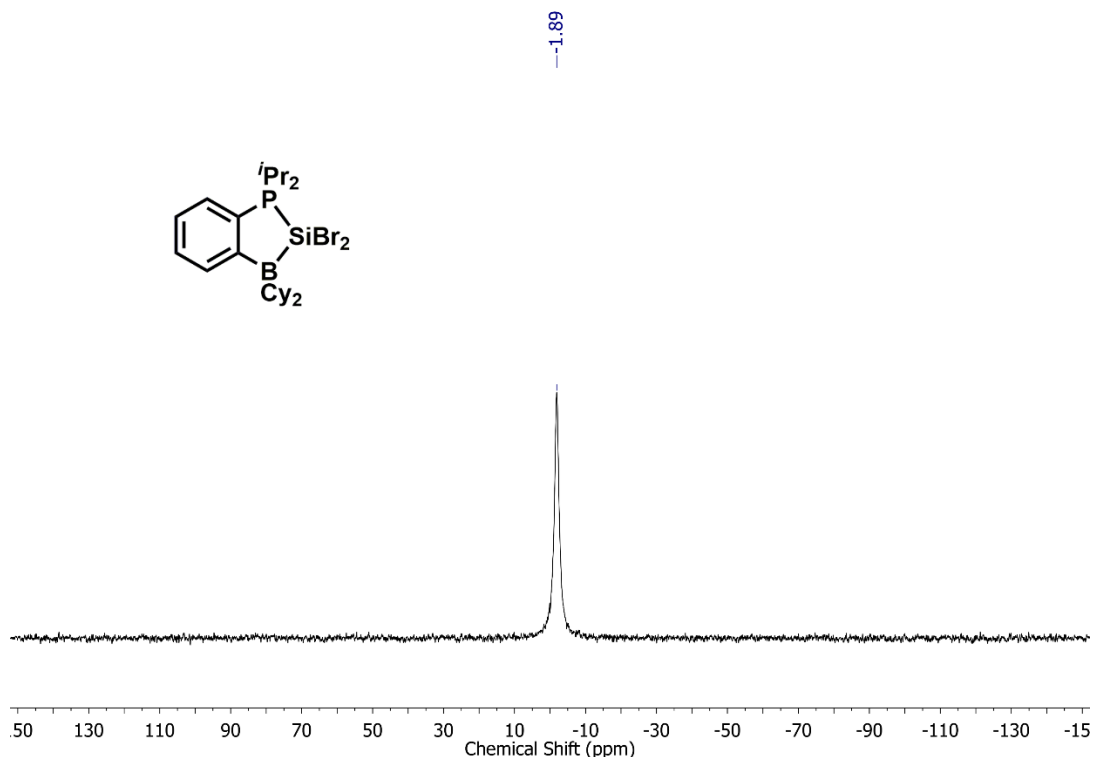

**Figure S5.**  $^{11}\text{B}\{^1\text{H}\}$  NMR spectrum of [PB{SiBr<sub>2</sub>}] (5) in C<sub>6</sub>D<sub>6</sub>.

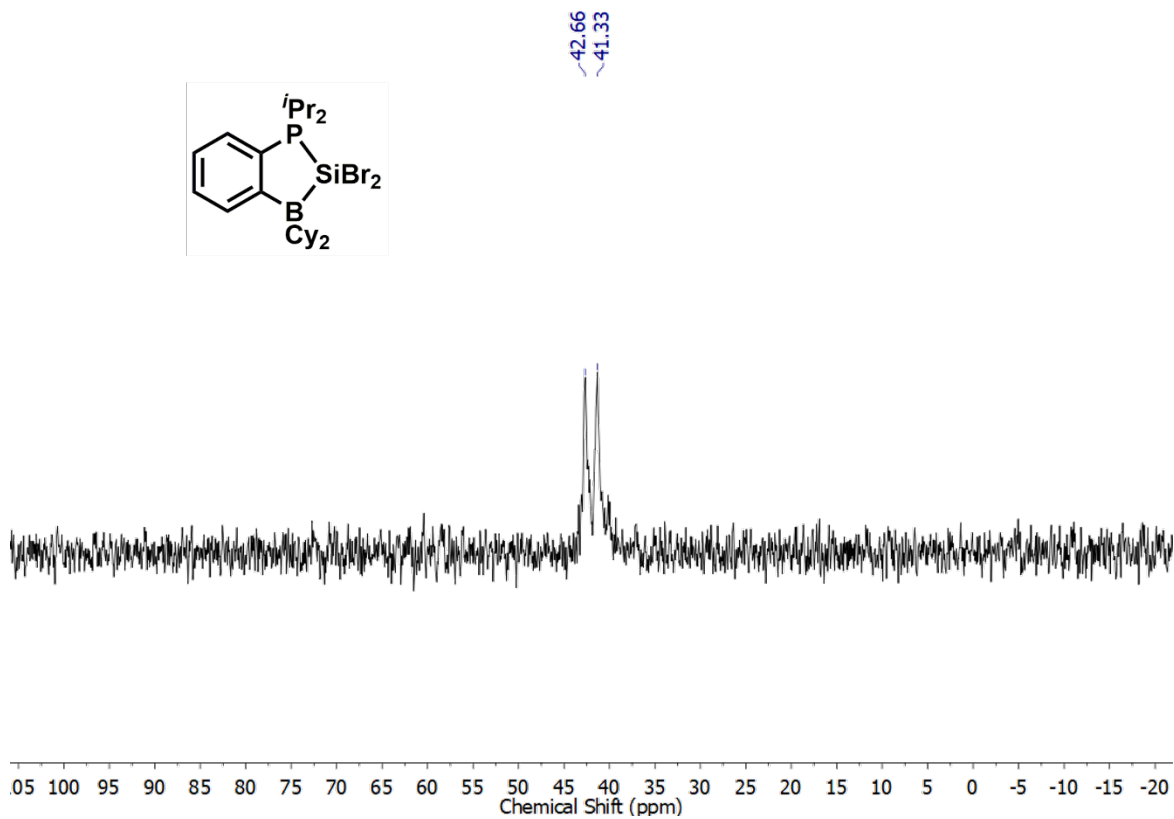

**Figure S6.**  $^{29}\text{Si}\{^1\text{H}\}$  NMR spectrum of [PB{SiBr<sub>2</sub>}] (5) in C<sub>6</sub>D<sub>6</sub>.

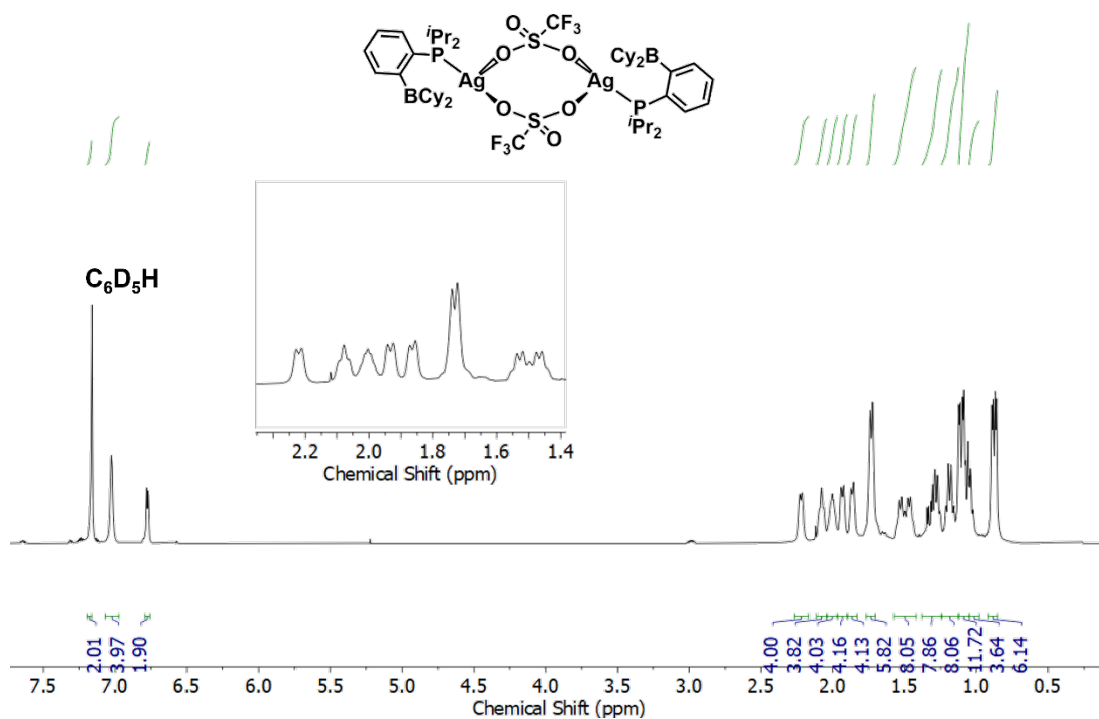

Figure S7.  $^1\text{H}$  NMR spectrum of  $[\text{PB}\{\text{AgOTf}\}]_2$  in  $\text{C}_6\text{D}_6$ .

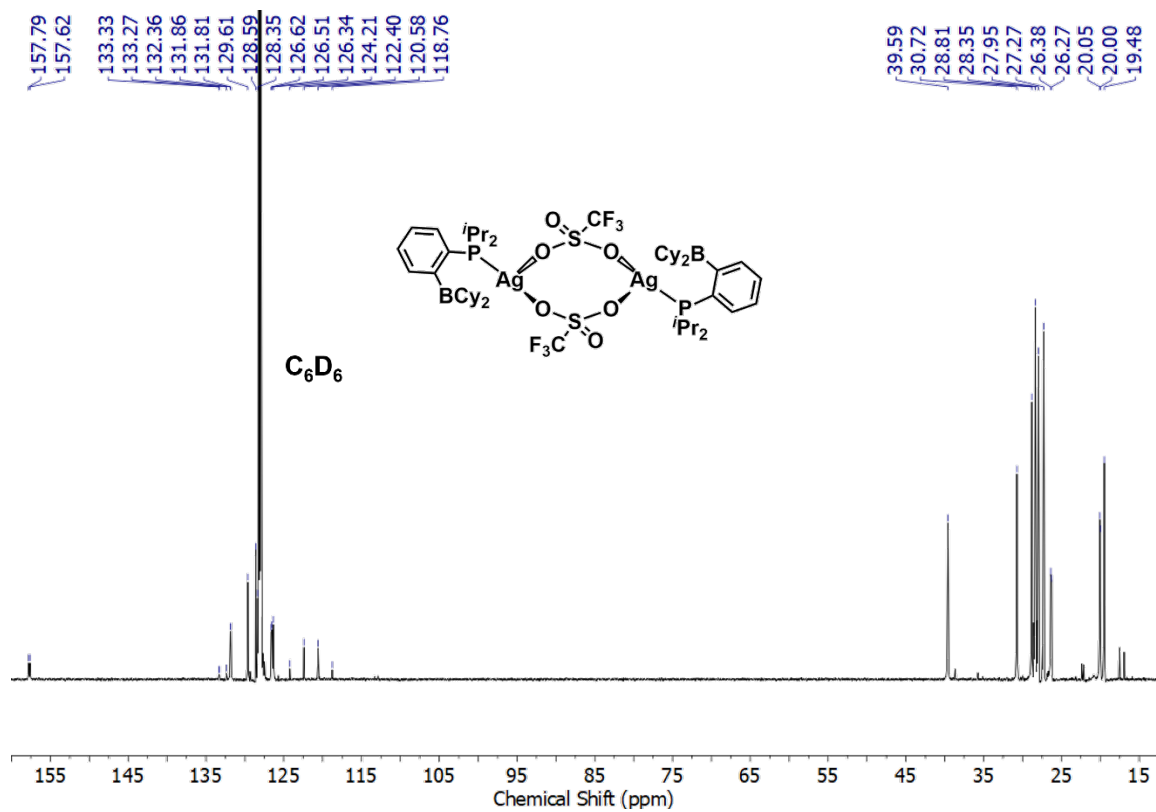

Figure S8.  $^{13}\text{C}\{^1\text{H}\}$  NMR spectrum of  $[\text{PB}\{\text{AgOTf}\}]_2$  in  $\text{C}_6\text{D}_6$ .

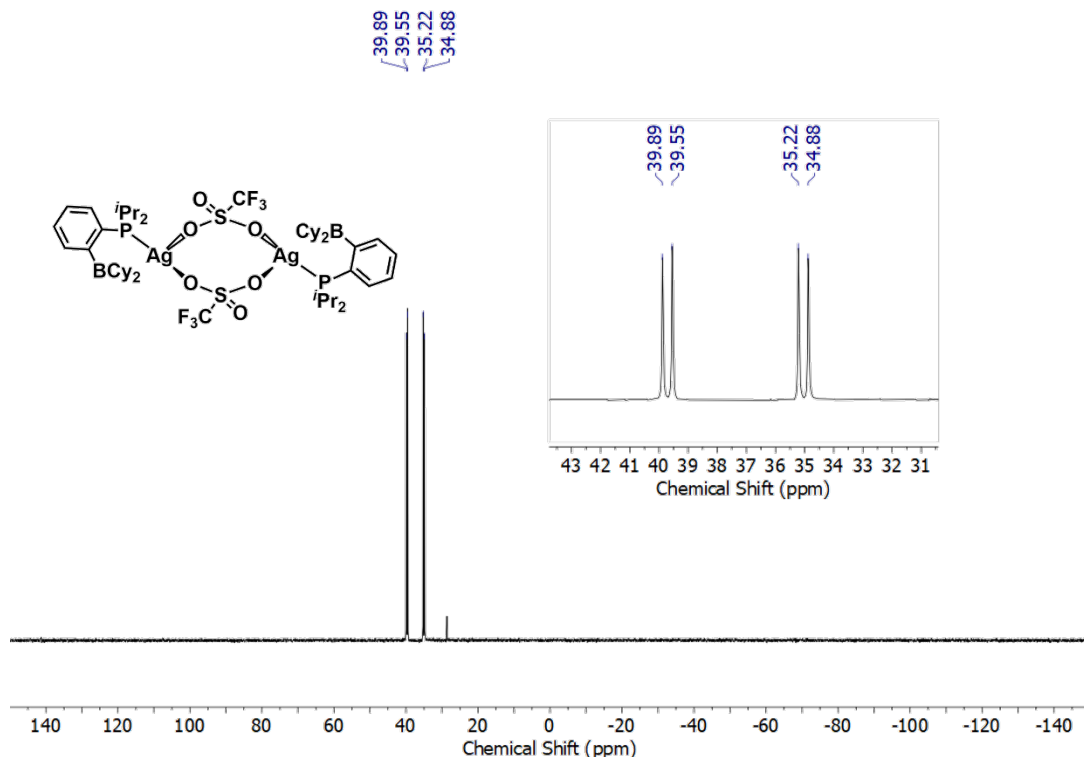

**Figure S9.**  $^{31}P\{^1H\}$  NMR spectrum of  $[PB\{AgOTf\}_2]_2$  in  $C_6D_6$ . The  $^{31}P$  resonance near 23 ppm is from an unknown impurity.

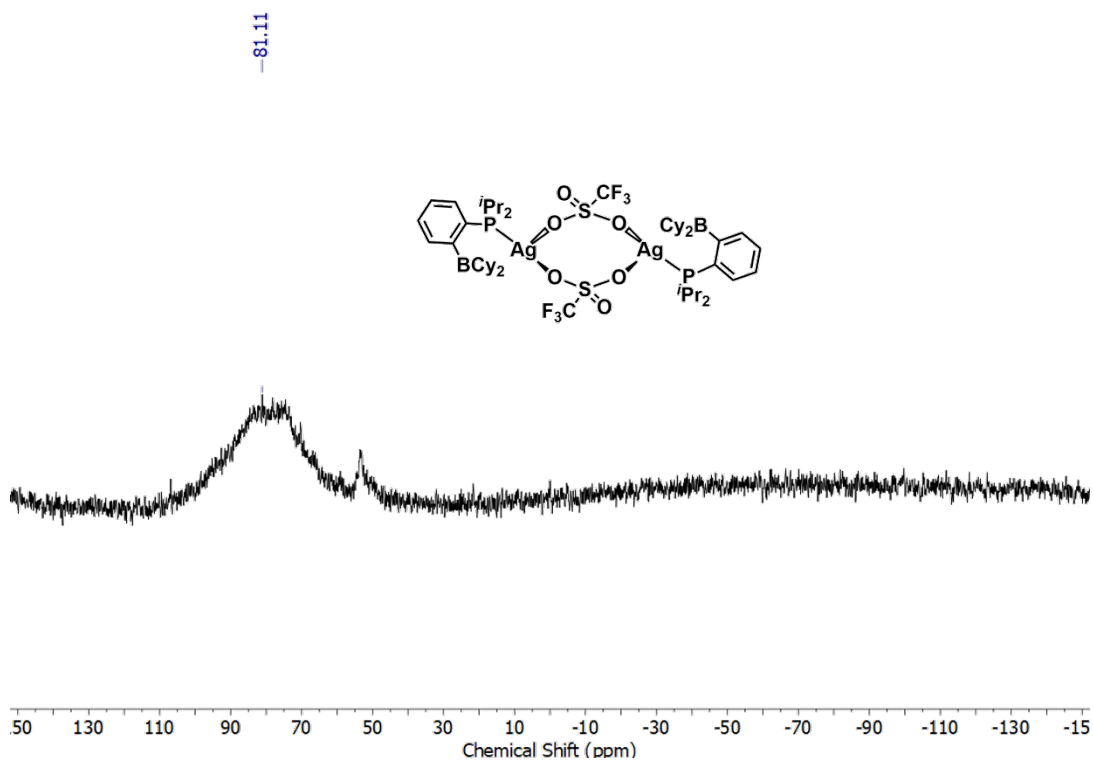

**Figure S10.**  $^{11}B\{^1H\}$  NMR spectrum of  $[PB\{AgOTf\}_2]_2$  in  $C_6D_6$ .

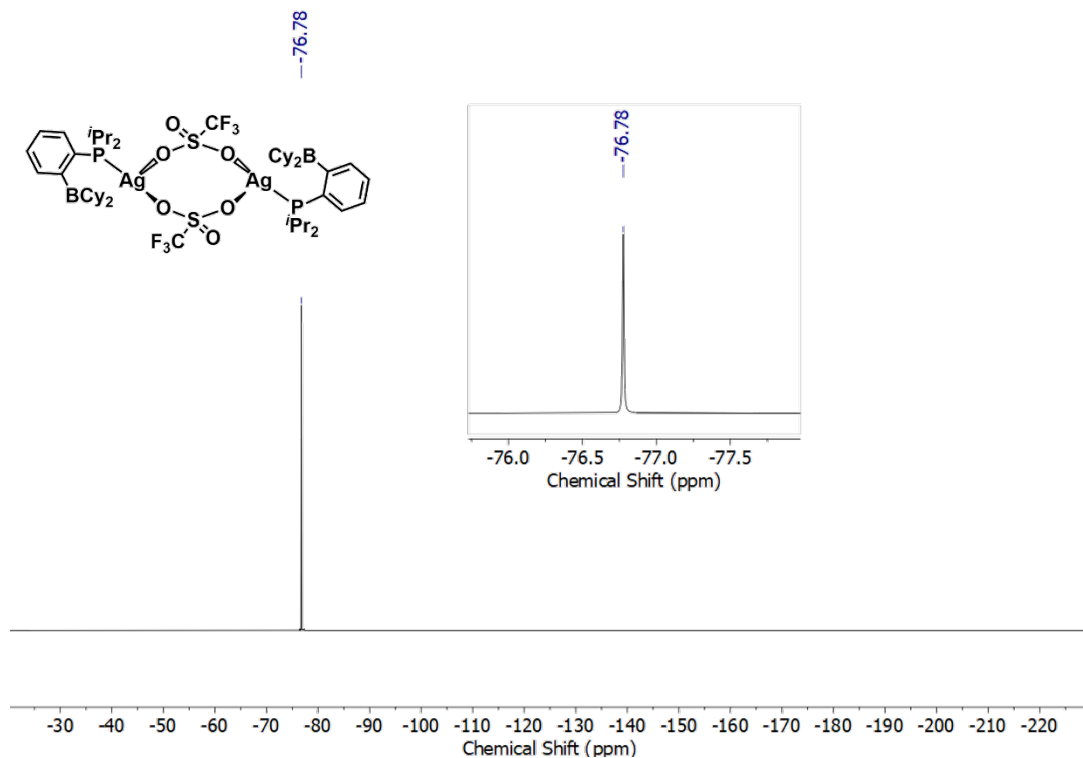

**Figure S11.**  $^{19}\text{F}\{^1\text{H}\}$  NMR spectrum of  $[\text{PB}\{\text{AgOTf}\}]_2$  in  $\text{C}_6\text{D}_6$ .

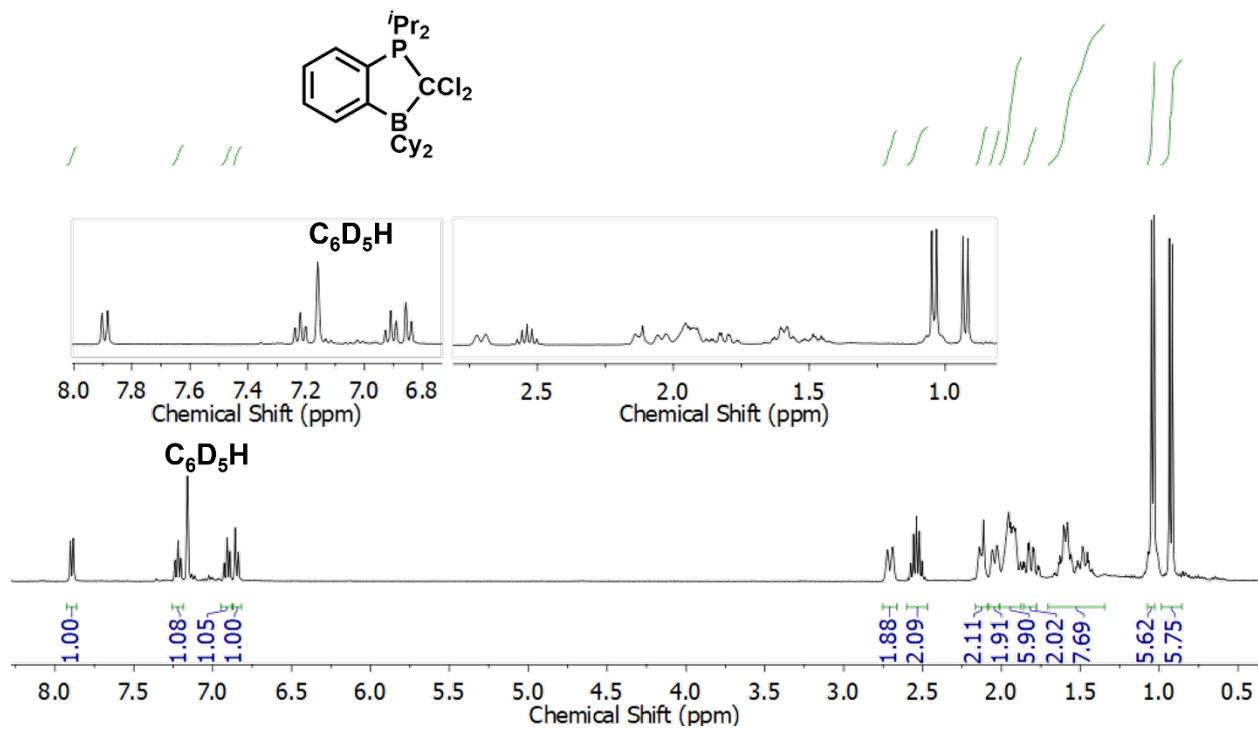

**Figure S12.**  $^1\text{H}\{^{31}\text{P}\}$  NMR spectrum of  $[\text{PB}\{\text{CCl}_2\}]$  (**6**) in  $\text{C}_6\text{D}_6$ .

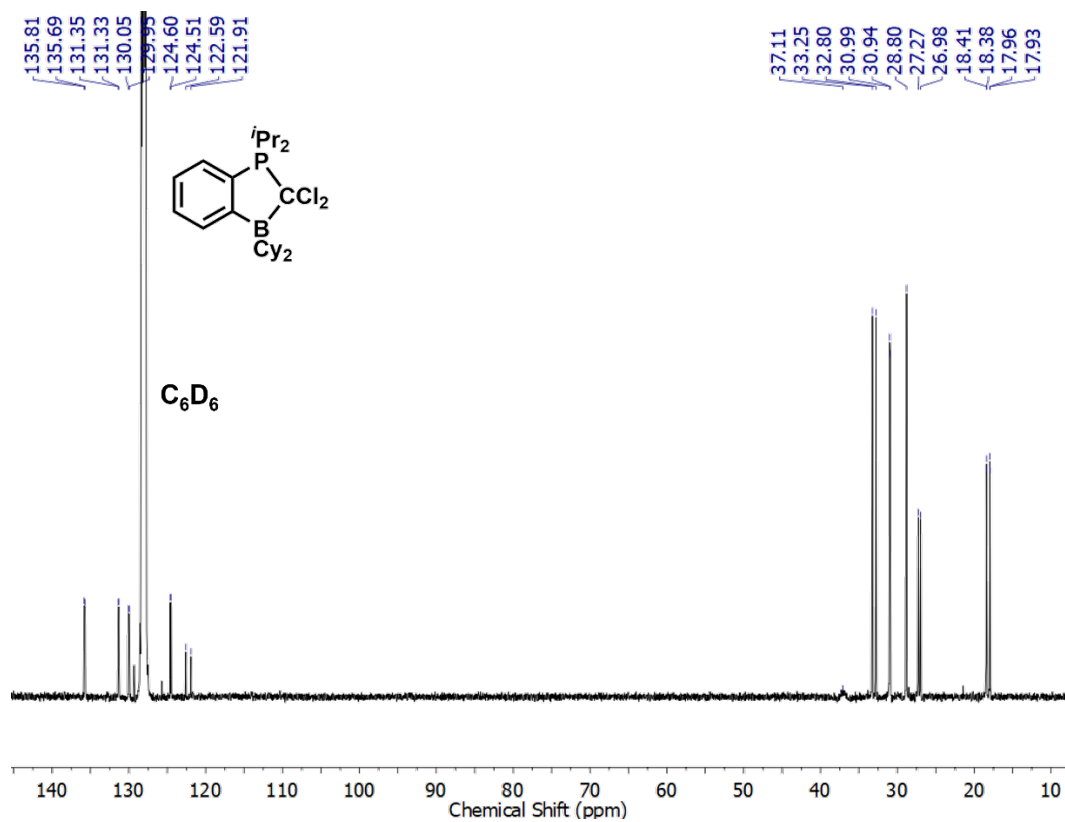

Figure S13.  $^{13}C\{^1H\}$  NMR spectrum of  $[PB\{CCl_2\}]$  (**6**) in  $C_6D_6$ .

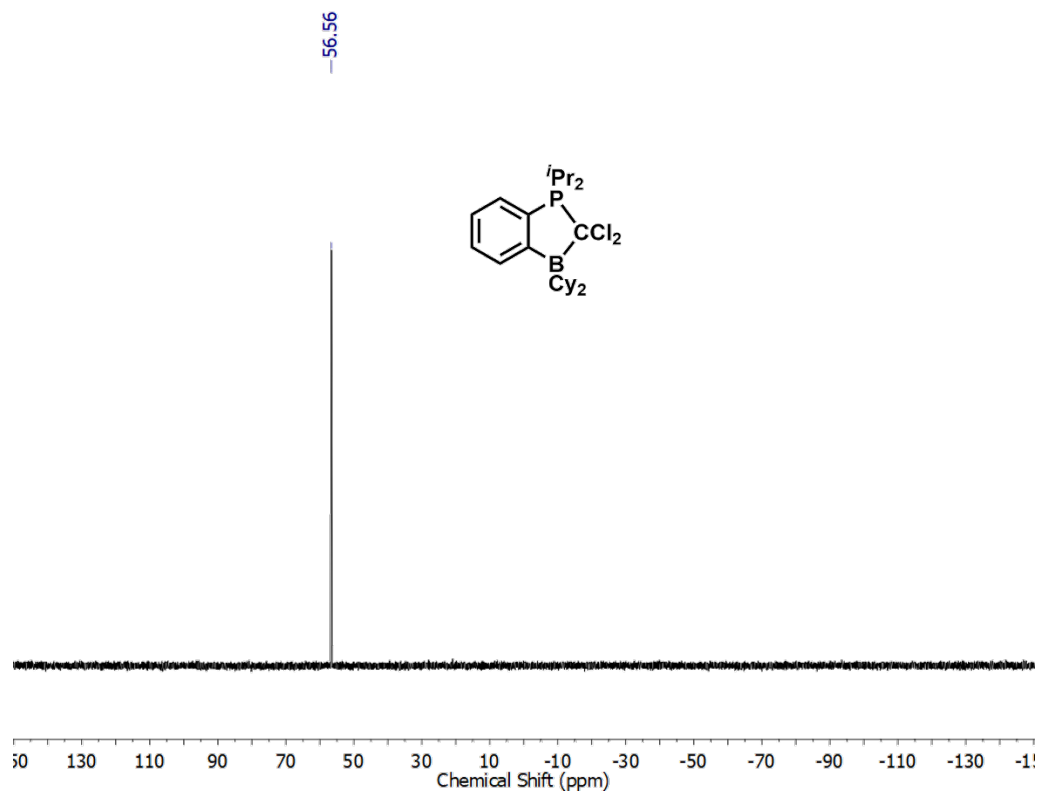

Figure S14.  $^{31}P\{^1H\}$  NMR spectrum of  $[PB\{CCl_2\}]$  (**6**) in  $C_6D_6$ .

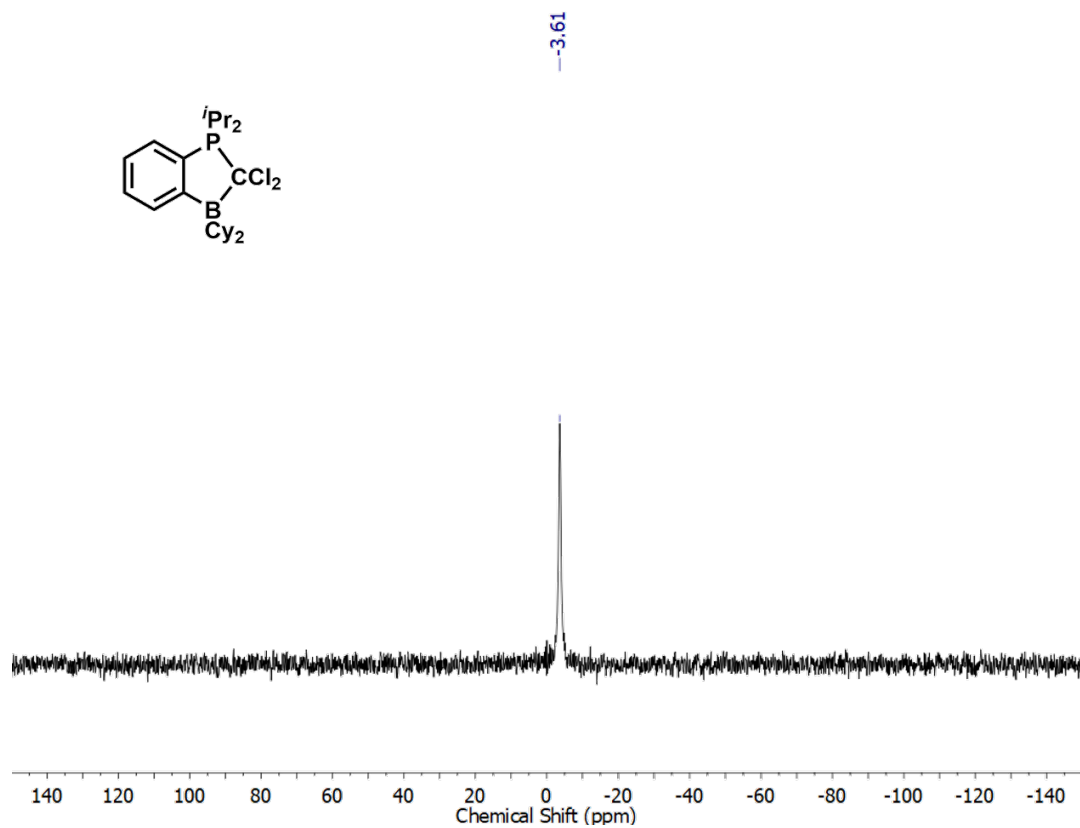

Figure S15.  $^{11}\text{B}\{^1\text{H}\}$  NMR spectrum of  $[\text{PB}\{\text{CCl}_2\}]$  (**6**) in  $\text{C}_6\text{D}_6$ .

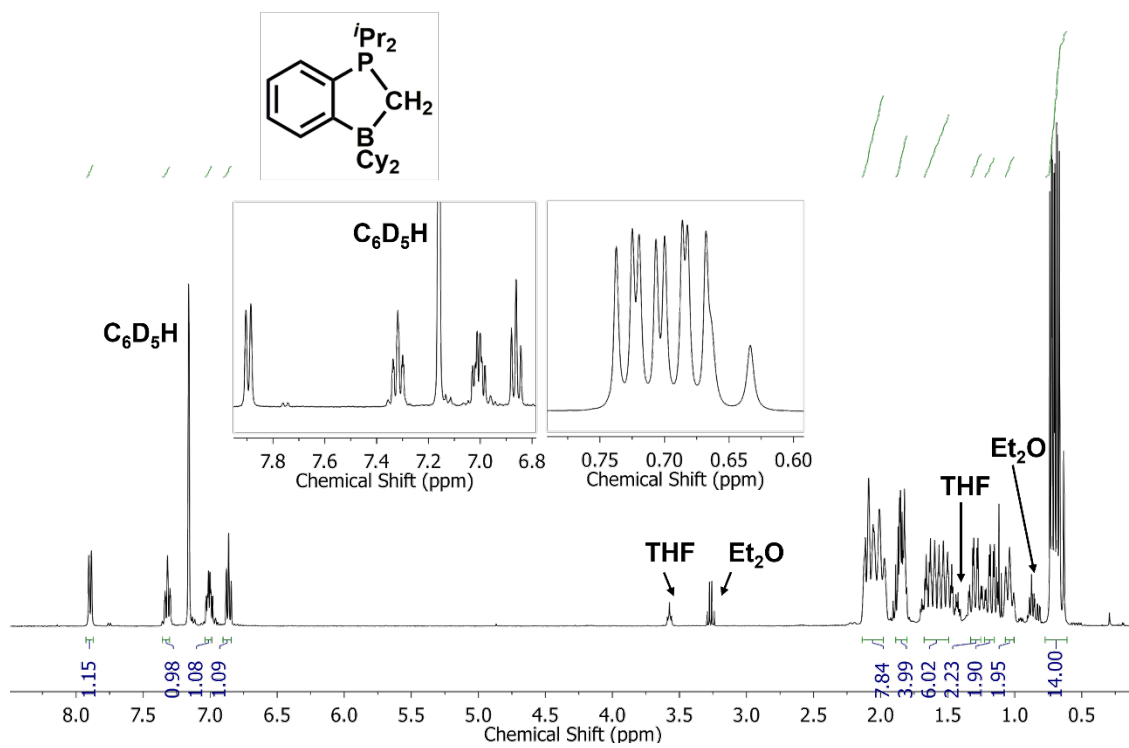

Figure S16.  $^1\text{H}$  NMR spectrum of  $[\text{PB}\{\text{CH}_2\}]$  (**7**) in  $\text{C}_6\text{D}_6$ .

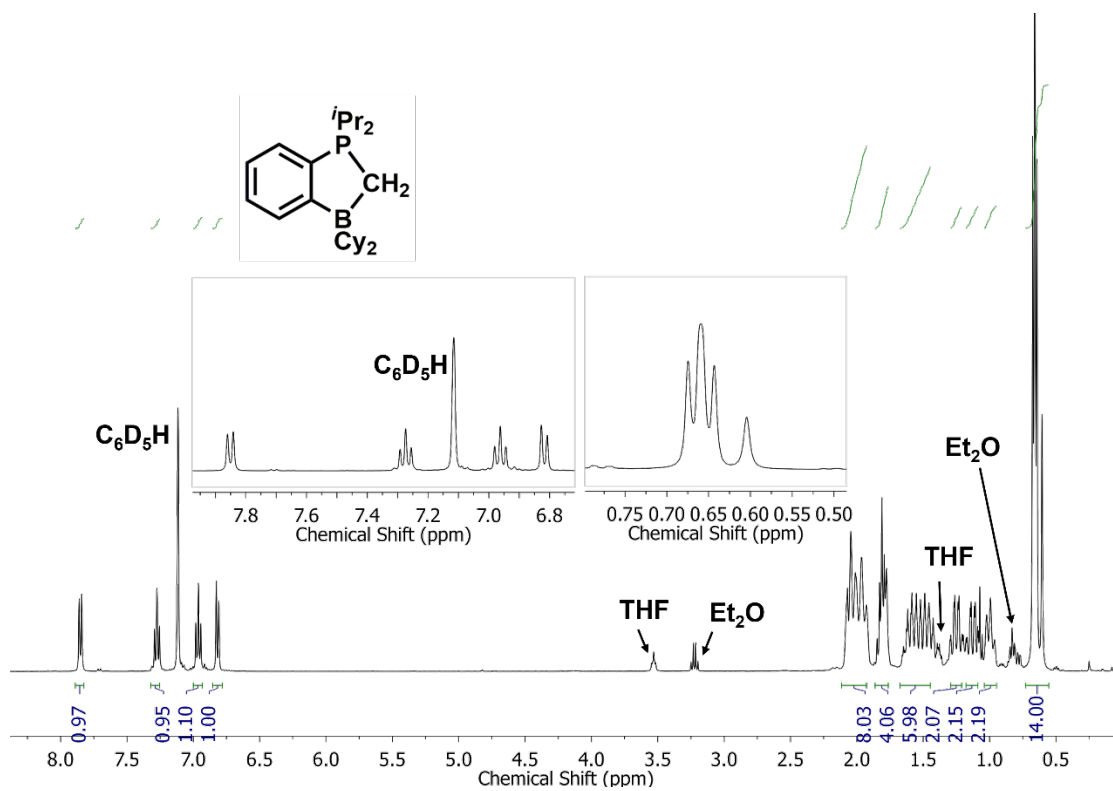

Figure S17. <sup>1</sup>H{<sup>31</sup>P} NMR spectrum of [PB{CH<sub>2</sub>}] (7) in C<sub>6</sub>D<sub>6</sub>.

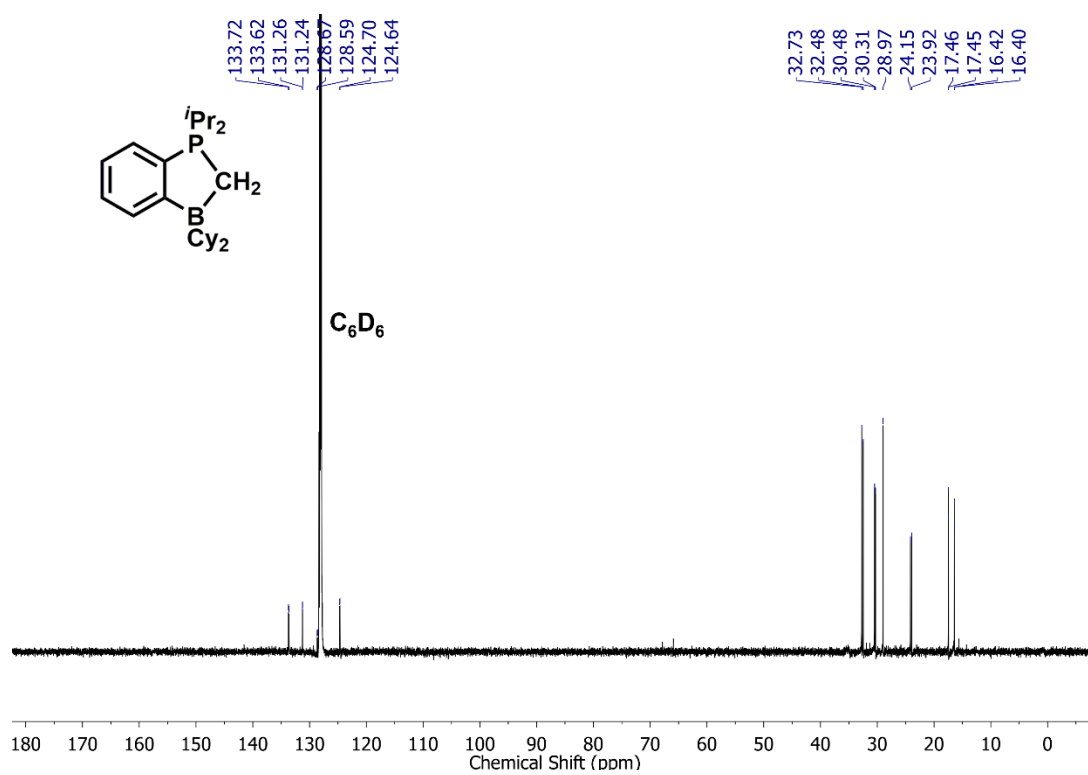

Figure S18. <sup>13</sup>C{<sup>1</sup>H} NMR spectrum of [PB{CH<sub>2</sub>}] (7) in C<sub>6</sub>D<sub>6</sub>.

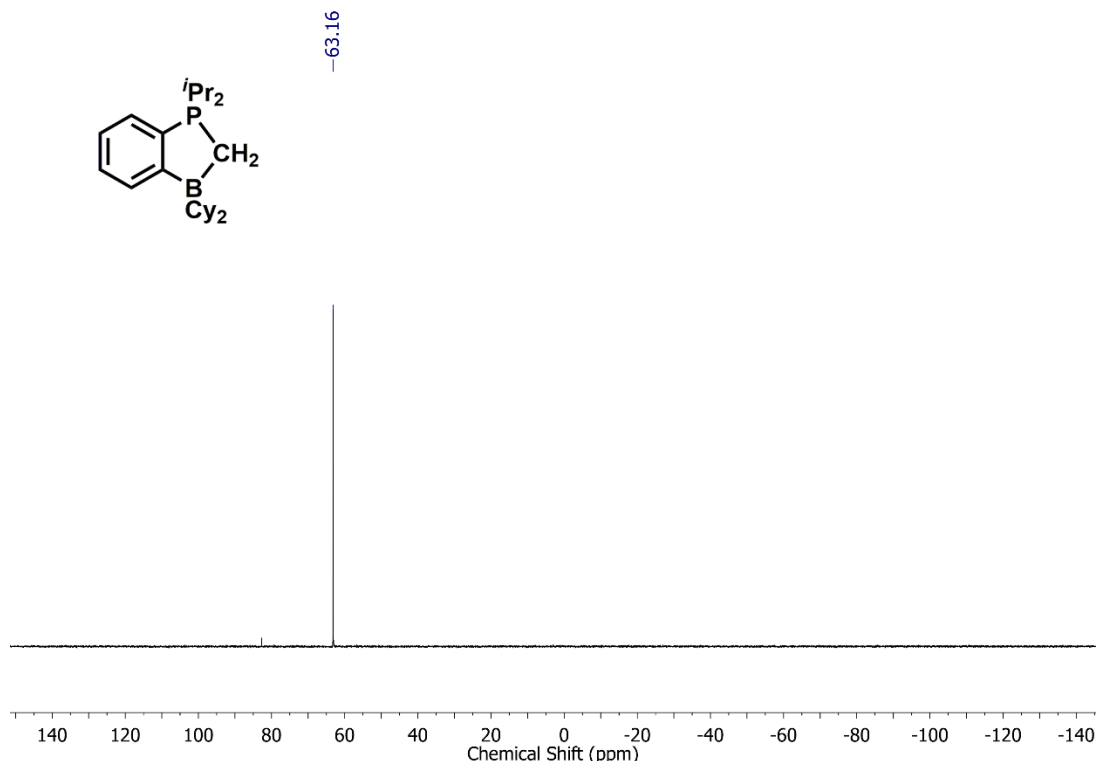

**Figure S19.**  $^{31}\text{P}\{^1\text{H}\}$  NMR spectrum of  $[\text{PB}\{\text{CH}_2\}]$  (**7**) in  $\text{C}_6\text{D}_6$ .

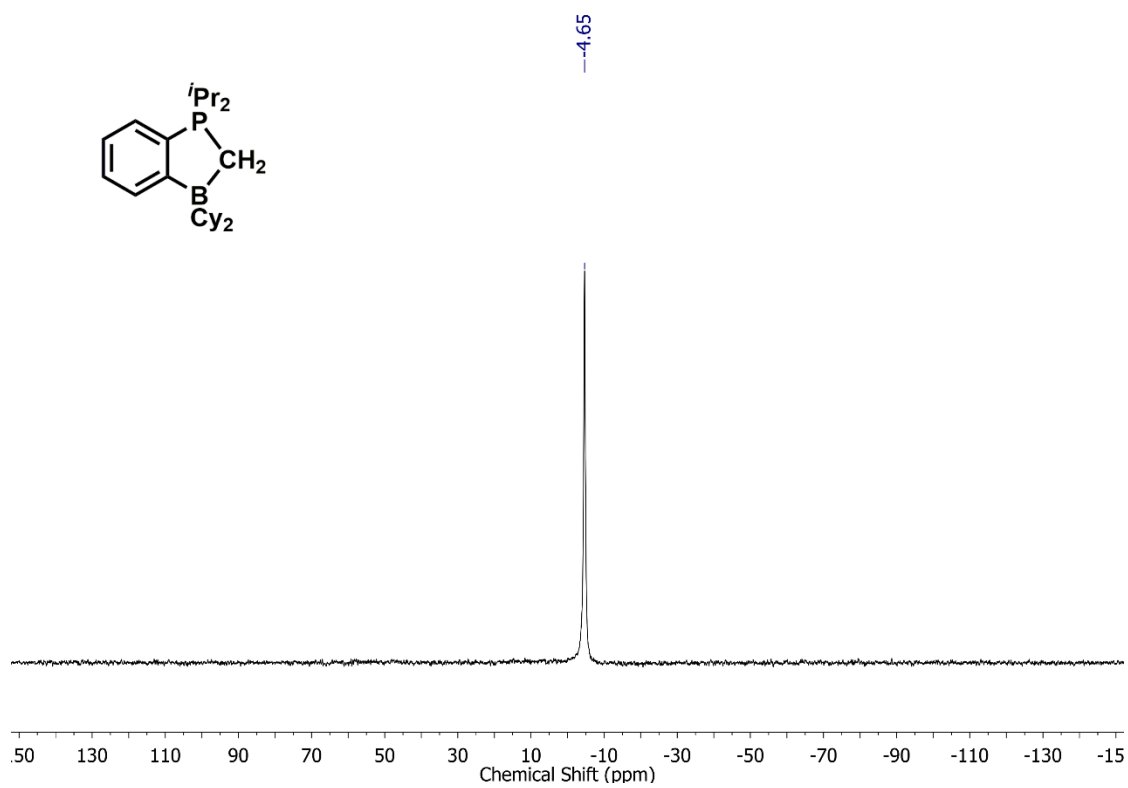

**Figure S20.**  $^{11}\text{B}\{^1\text{H}\}$  NMR spectrum of  $[\text{PB}\{\text{CH}_2\}]$  (**7**) in  $\text{C}_6\text{D}_6$ .



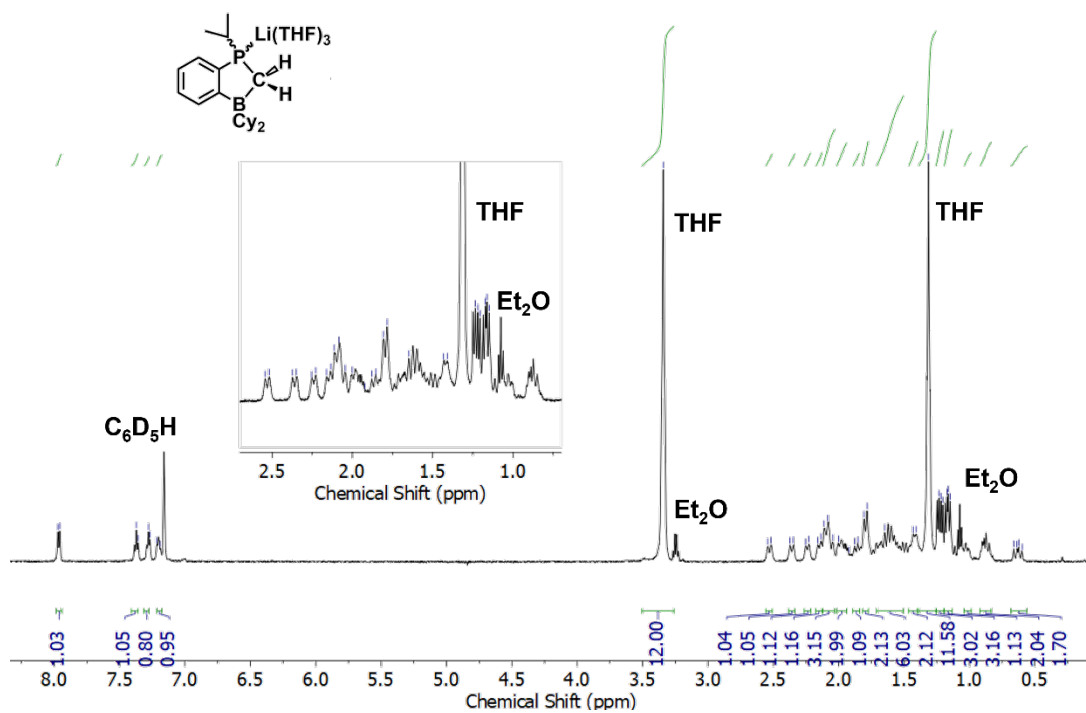

Figure S21.  $^1\text{H}$  NMR spectrum of  $[(\text{THF})_3\text{Li}]^+\text{PrP}(\text{C}_6\text{H}_4)\text{BCy}_2\{\text{CH}_2\}$  (**8**) in  $\text{C}_6\text{D}_6$ .

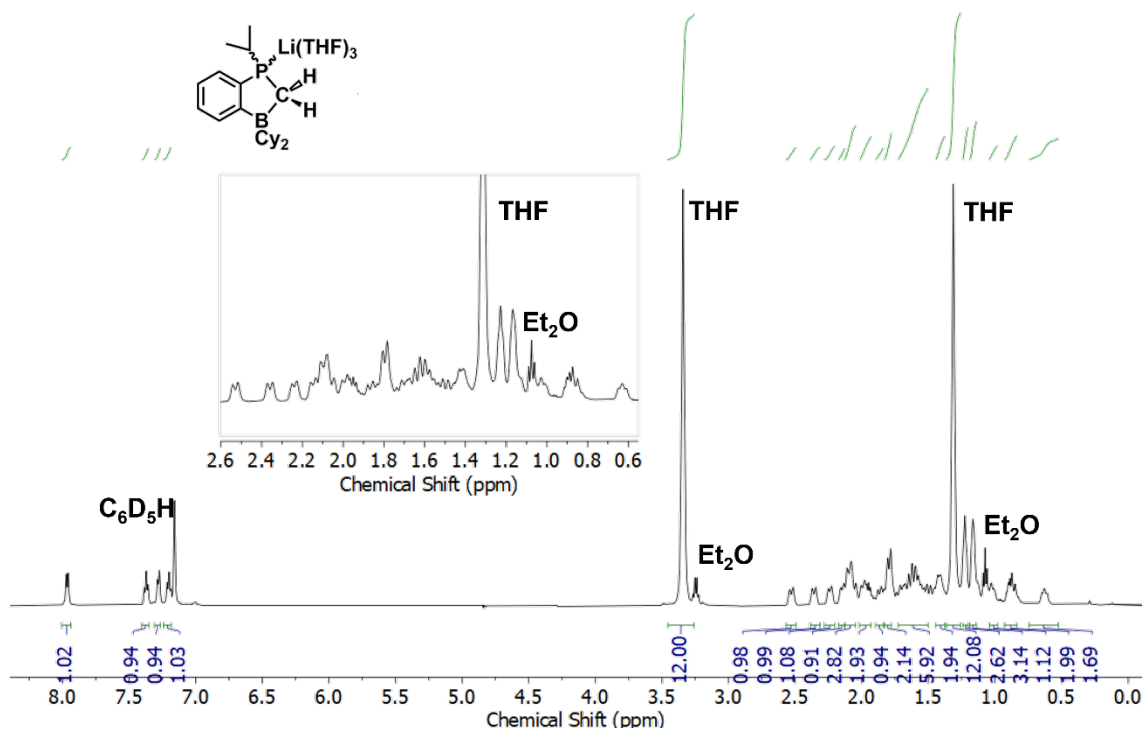

Figure S22.  $^1\text{H}\{^{31}\text{P}\}$  NMR spectrum of  $[(\text{THF})_3\text{Li}]^+\text{PrP}(\text{C}_6\text{H}_4)\text{BCy}_2\{\text{CH}_2\}$  (**8**) in  $\text{C}_6\text{D}_6$ .

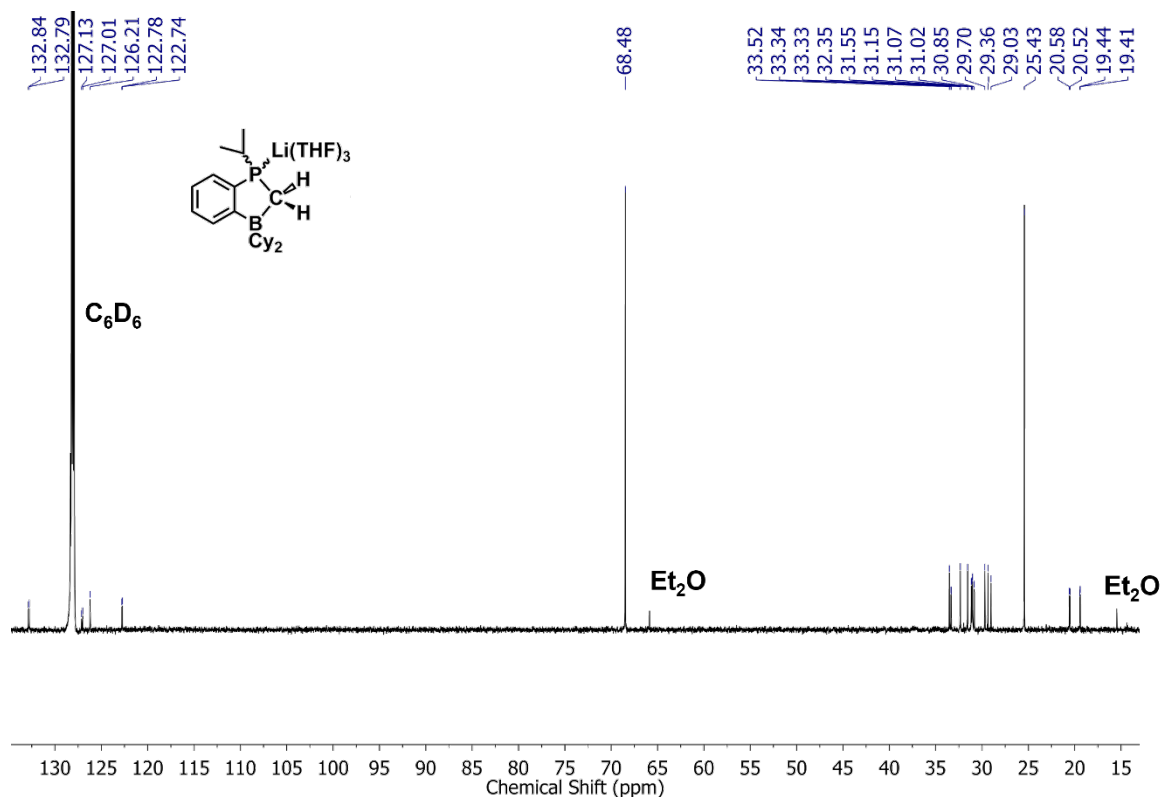

**Figure S23.** <sup>13</sup>C{<sup>1</sup>H} NMR spectrum of  $[(\text{THF})_3\text{Li}]^+\text{PrP}(\text{C}_6\text{H}_4)\text{BCy}_2\{\text{CH}_2\}$  (**8**) in C<sub>6</sub>D<sub>6</sub>.

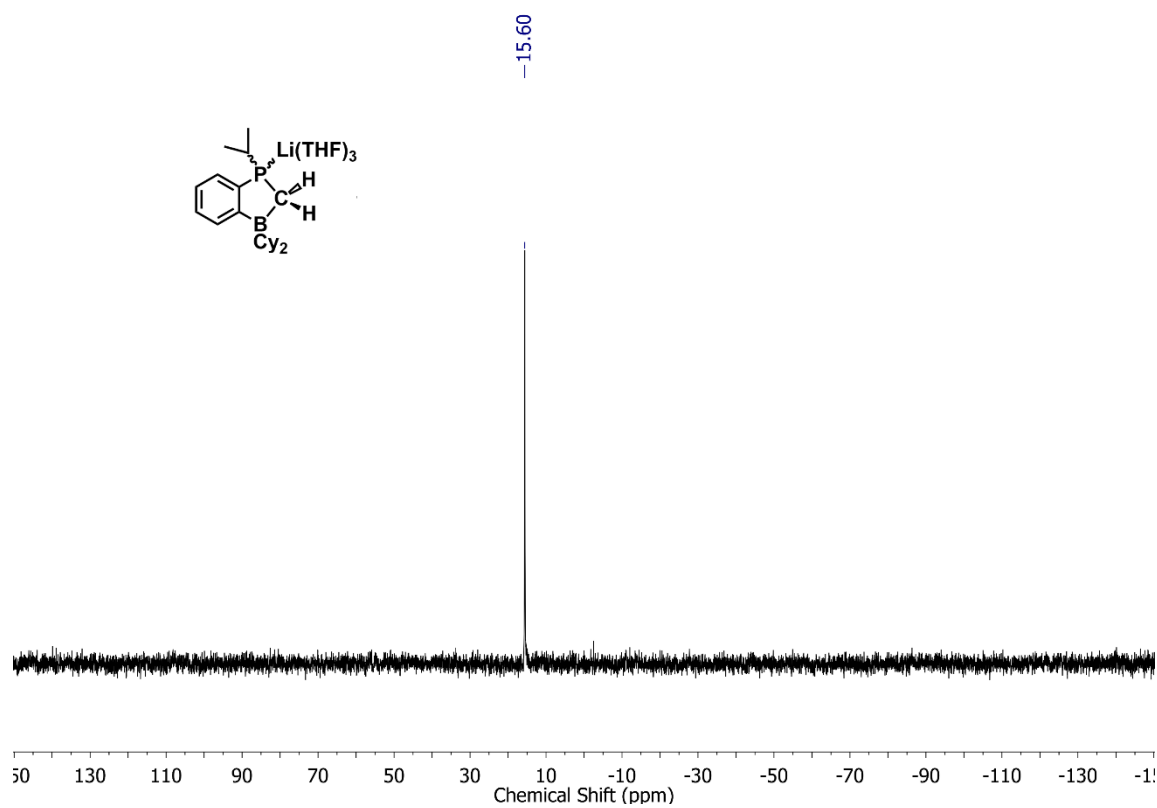

**Figure S24.** <sup>31</sup>P{<sup>1</sup>H} NMR spectrum of  $[(\text{THF})_3\text{Li}]^+\text{PrP}(\text{C}_6\text{H}_4)\text{BCy}_2\{\text{CH}_2\}$  (**8**) in C<sub>6</sub>D<sub>6</sub>.

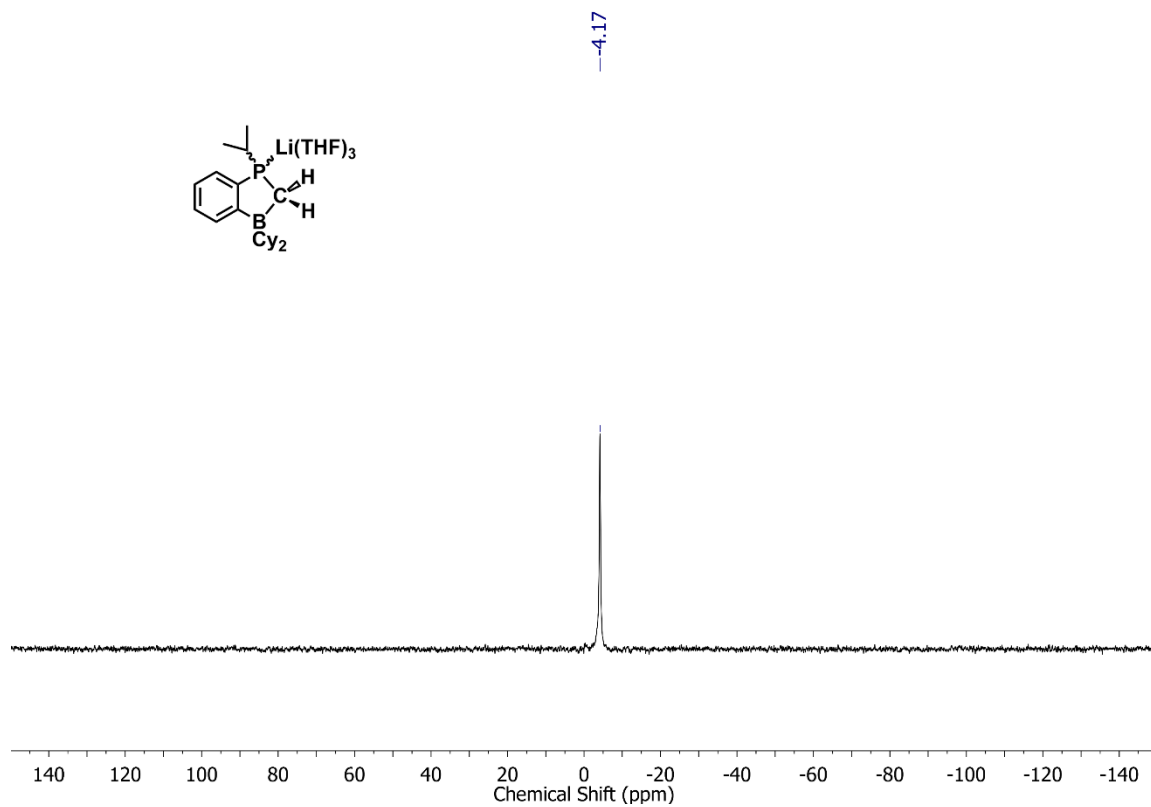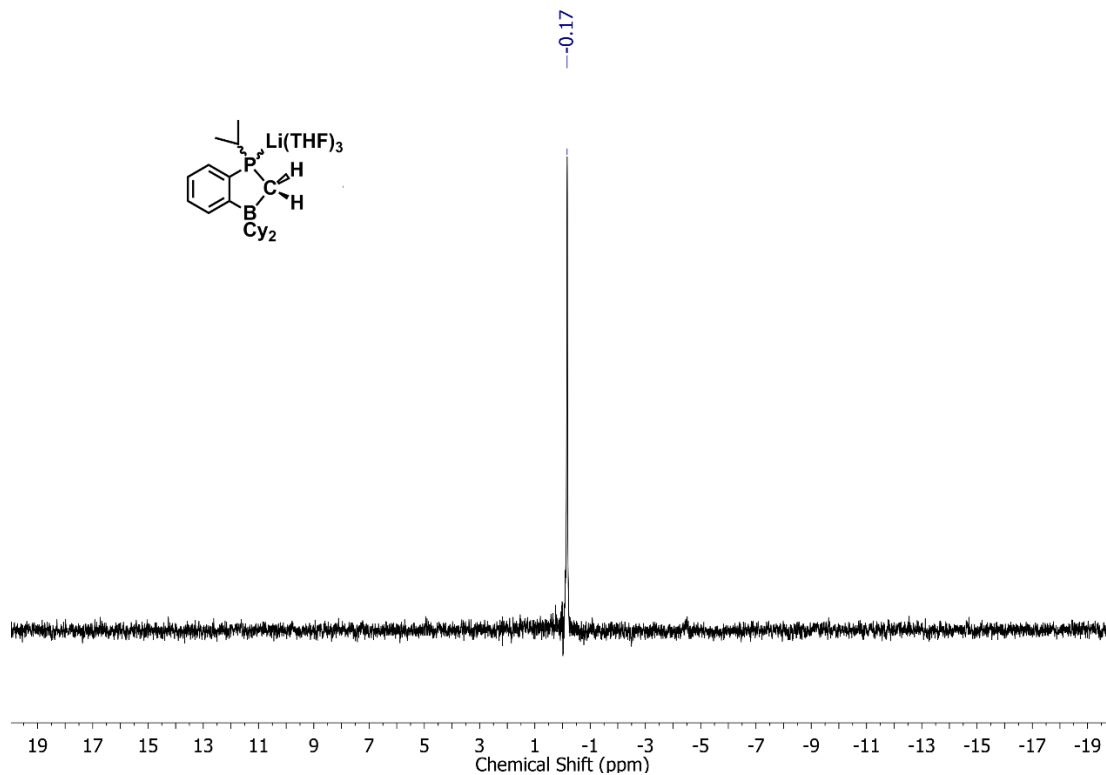

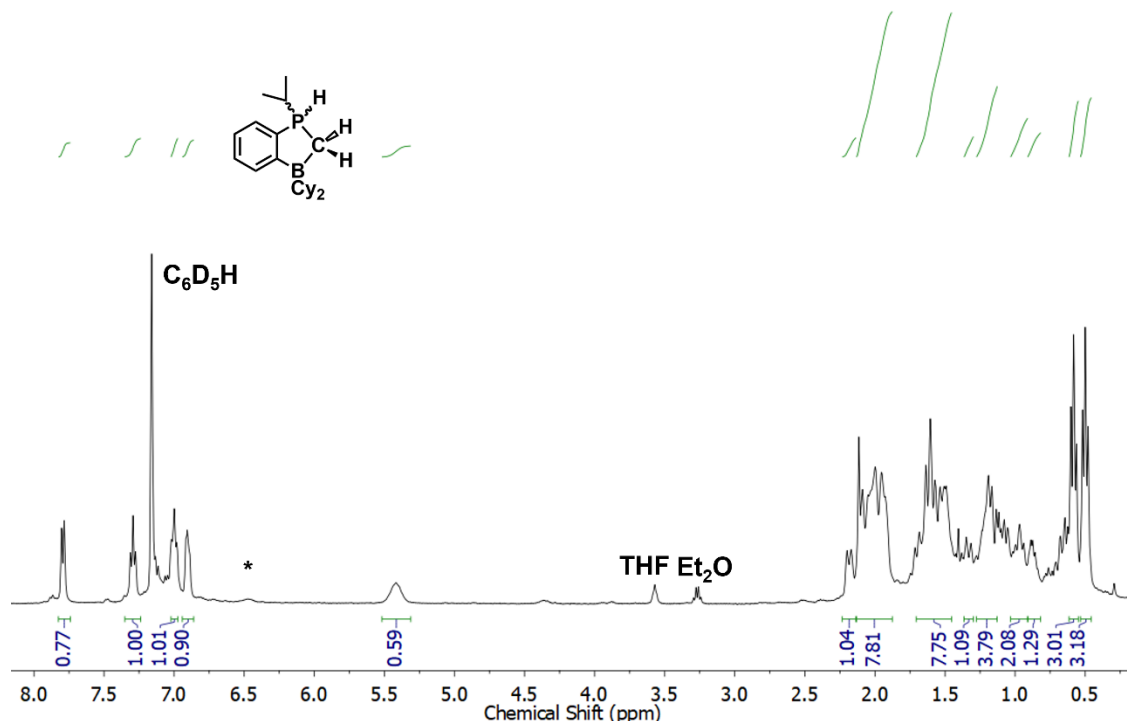

**Figure S27.**  $^1H\{^{31}P\}$  NMR spectrum of  $[iPr(H)P(C_6H_4)BCy_2\{CH_2\}]$  (9) in  $C_6D_6$ . Peaks labelled with an asterisk (\*) are unknown.

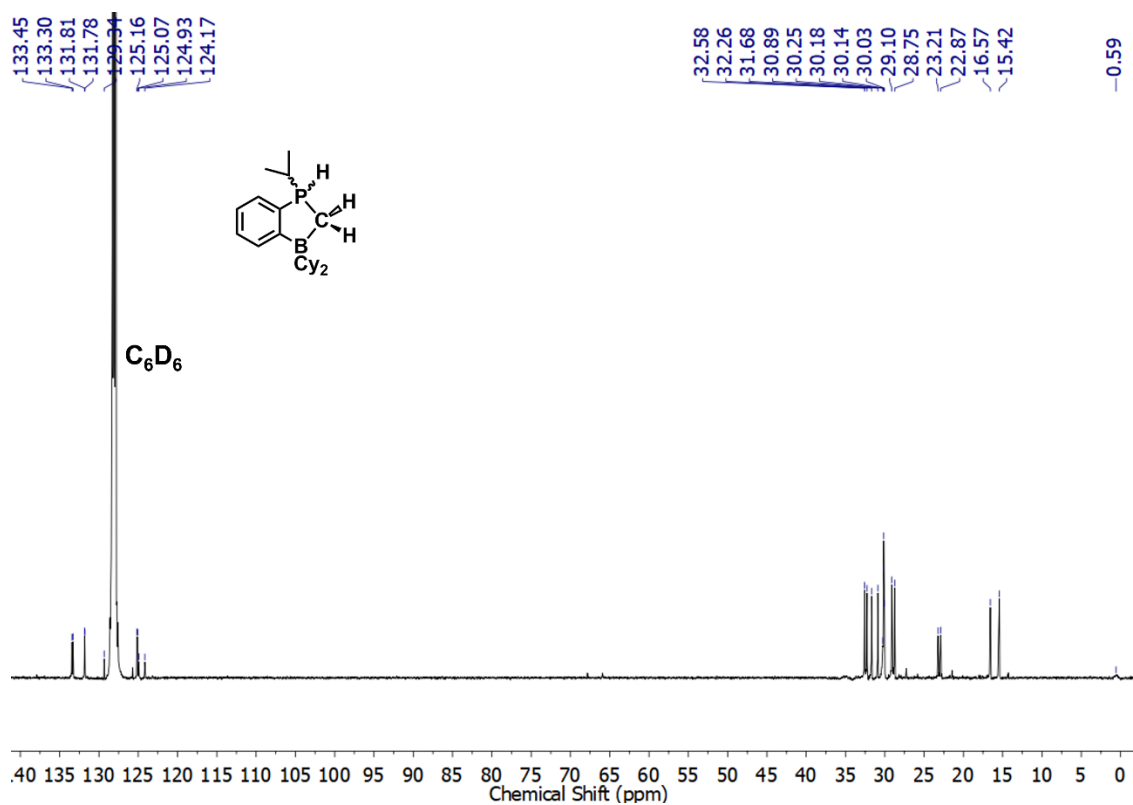

**Figure S28.**  $^{13}C\{^1H\}$  NMR spectrum of  $[iPr(H)P(C_6H_4)BCy_2\{CH_2\}]$  (9) in  $C_6D_6$ .

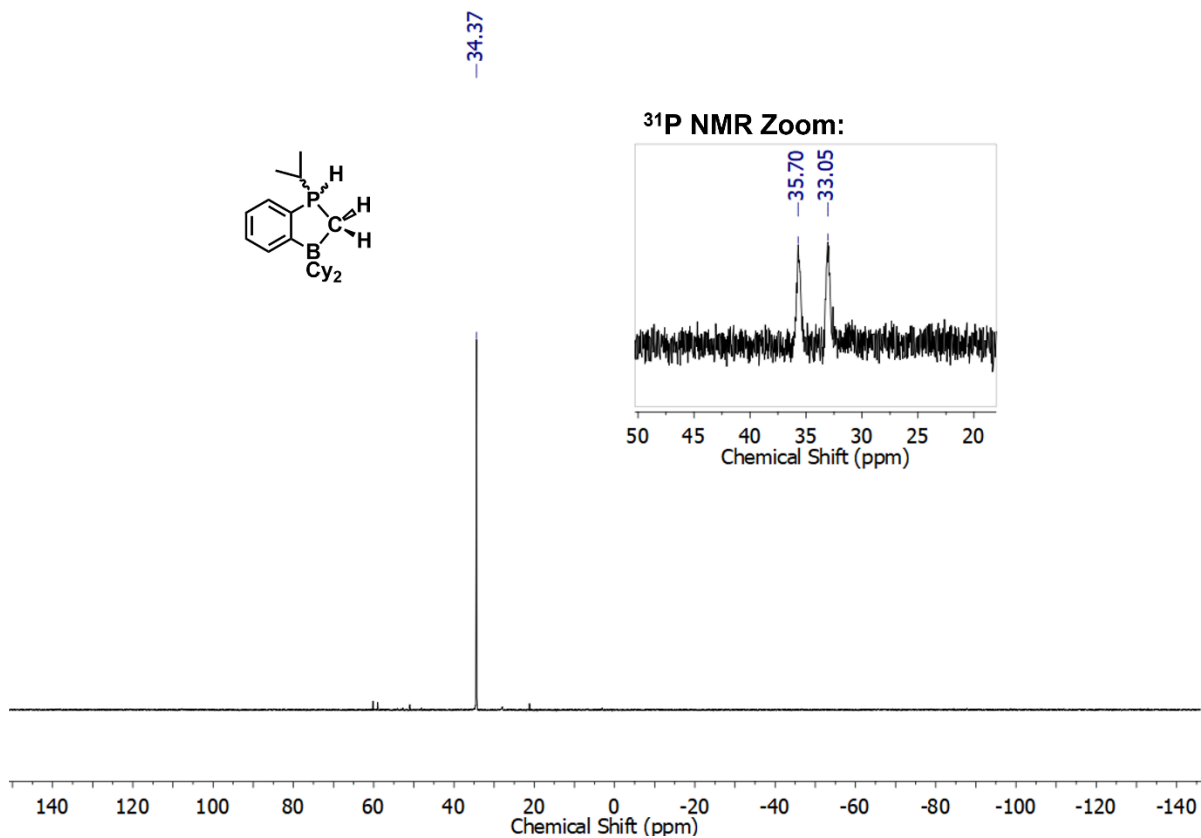

Figure S29.  $^{31}\text{P}\{^1\text{H}\}$  NMR spectrum of  $[^i\text{Pr}(\text{H})\text{P}(\text{C}_6\text{H}_4)\text{BCy}_2\{\text{CH}_2\}]$  (**9**) in  $\text{C}_6\text{D}_6$ .

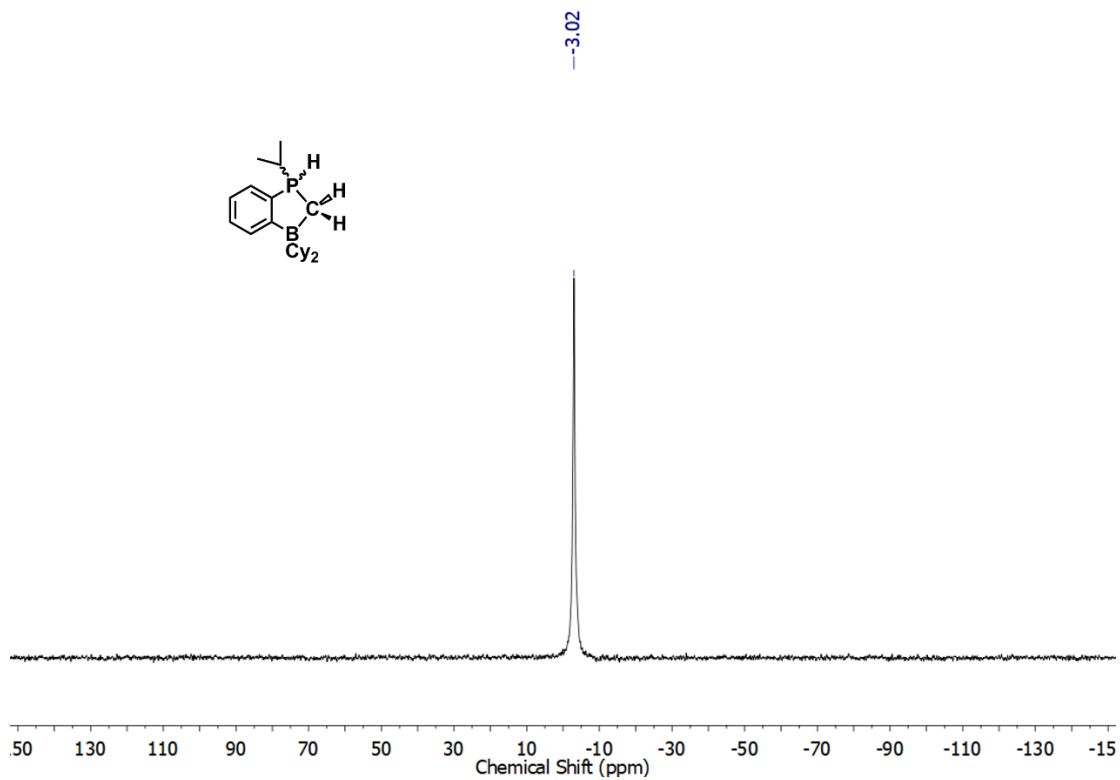

Figure S30.  $^{11}\text{B}\{^1\text{H}\}$  NMR spectrum of  $[^i\text{Pr}(\text{H})\text{P}(\text{C}_6\text{H}_4)\text{BCy}_2\{\text{CH}_2\}]$  (**9**) in  $\text{C}_6\text{D}_6$ .

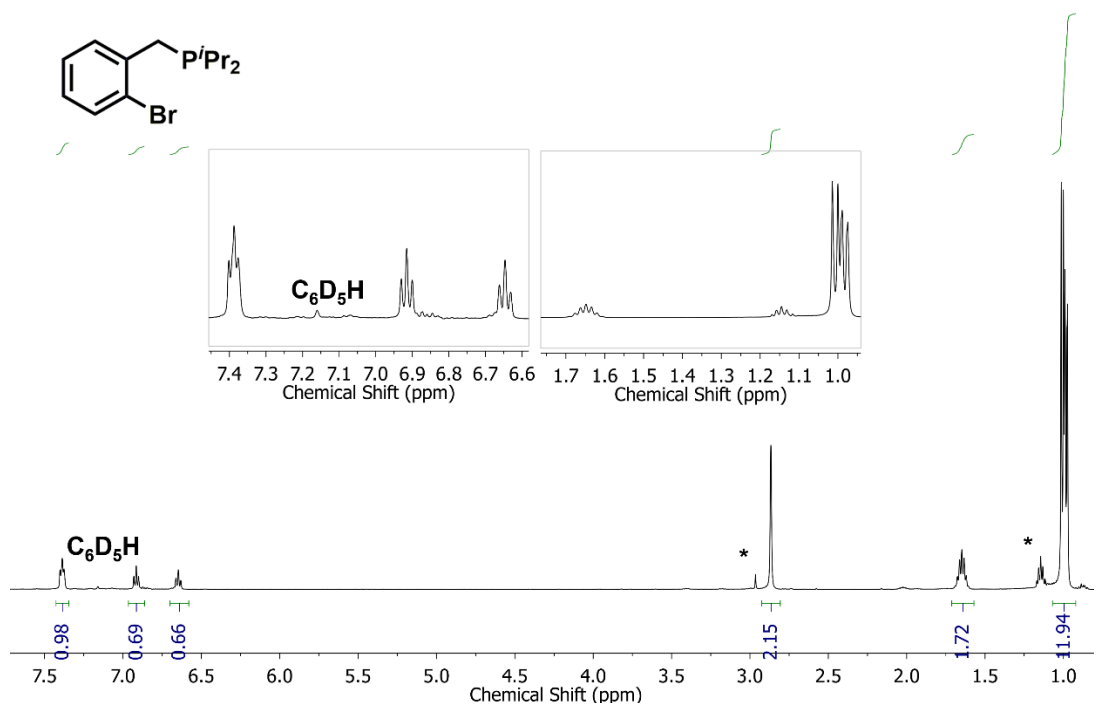

**Figure S31.**  $^1\text{H}$  NMR spectrum of  $i\text{Pr}_2\text{PCH}_2(\text{C}_6\text{H}_4)\text{Br}$  in  $\text{C}_6\text{D}_6$ . Peaks labelled with an asterisk (\*) are unknown; however, it is likely  $(i\text{Pr}_2\text{P})_2$  since the  $^{31}\text{P}$  NMR of this sample (Figure S34; see below) shows an impurity consistent with the reported  $^{31}\text{P}$  data for  $(i\text{Pr}_2\text{P})_2$ .<sup>S6</sup>

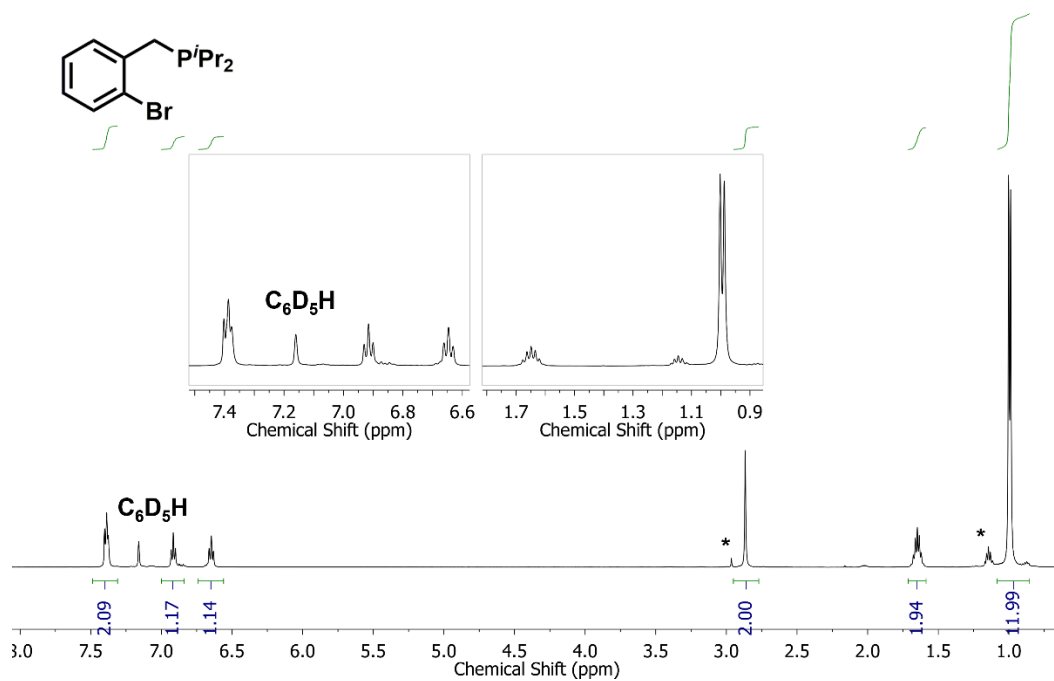

**Figure S32.**  $^1\text{H}\{^{31}\text{P}\}$  NMR spectrum of  $i\text{Pr}_2\text{PCH}_2(\text{C}_6\text{H}_4)\text{Br}$  in  $\text{C}_6\text{D}_6$ . Peaks labelled with an asterisk (\*) are unknown; however, it is likely  $(i\text{Pr}_2\text{P})_2$  since the  $^{31}\text{P}$  NMR of this sample (Figure S34; see below) shows an impurity consistent with the reported  $^{31}\text{P}$  data for  $(i\text{Pr}_2\text{P})_2$ .<sup>S6</sup>

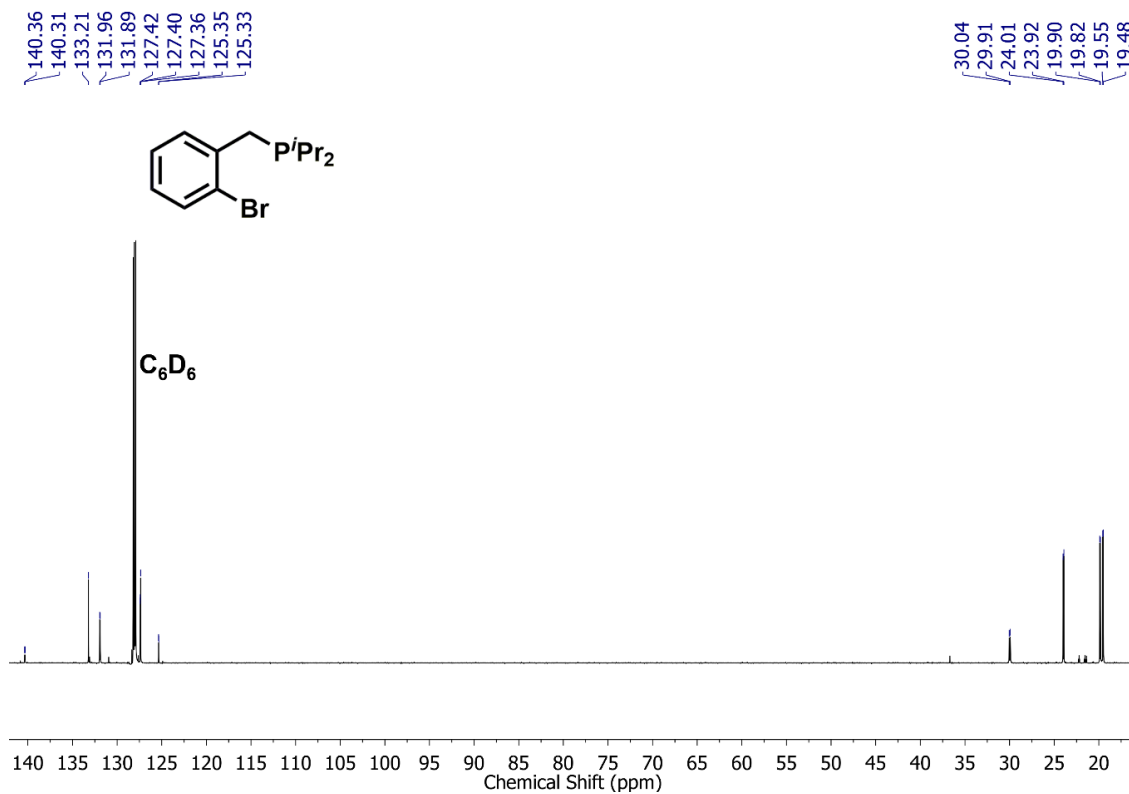

**Figure S33.**  $^{13}\text{C}\{^1\text{H}\}$  NMR spectrum of  $i\text{Pr}_2\text{PCH}_2(\text{C}_6\text{H}_4)\text{Br}$  in  $\text{C}_6\text{D}_6$ .

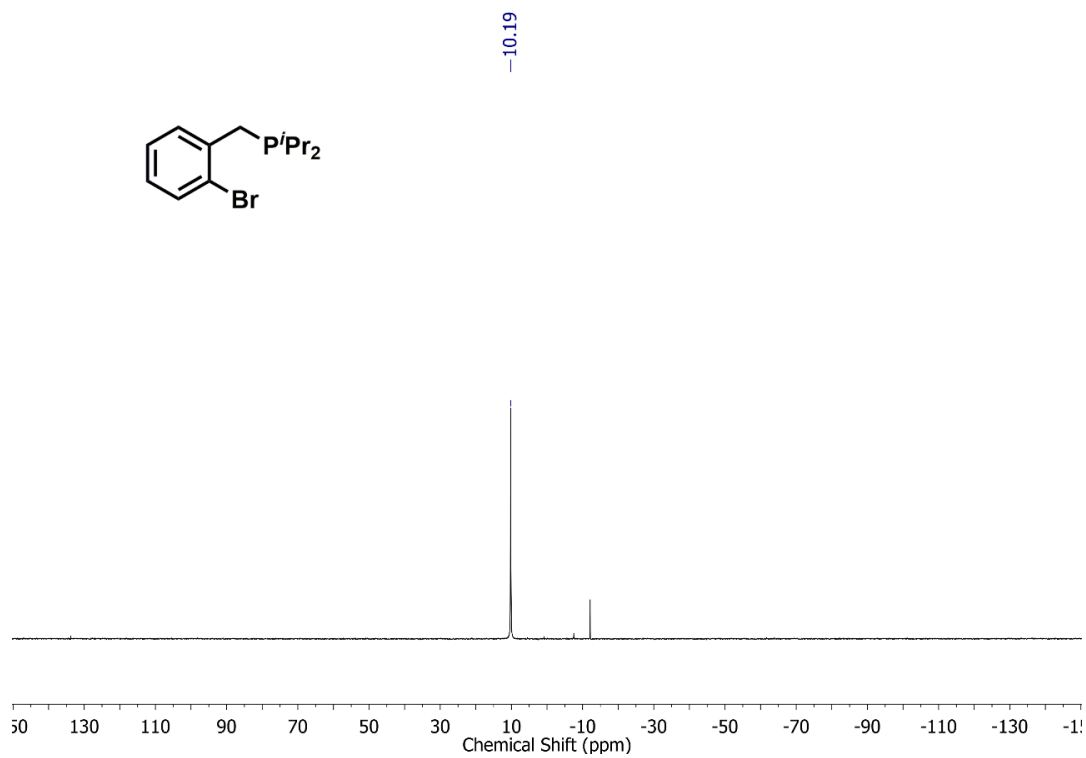

**Figure S34.**  $^{31}\text{P}\{^1\text{H}\}$  NMR spectrum of  $i\text{Pr}_2\text{PCH}_2(\text{C}_6\text{H}_4)\text{Br}$  in  $\text{C}_6\text{D}_6$ . The  $^{31}\text{P}$  resonance at -12 ppm is consistent with the reported  $^{31}\text{P}$  data for  $(i\text{Pr}_2\text{P})_2$ .<sup>56</sup>

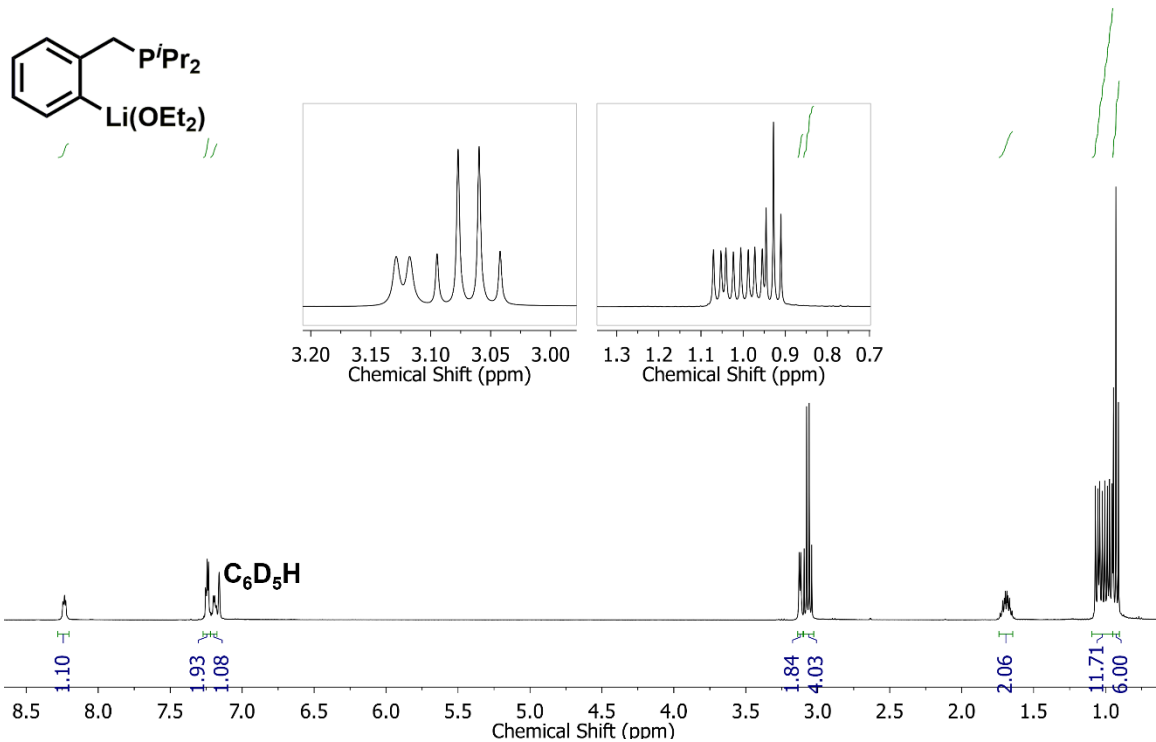

Figure S35.  $^1\text{H}$  NMR spectrum of  $[\text{iPr}_2\text{PCH}_2(\text{C}_6\text{H}_4)\text{Li}(\text{OEt}_2)]_2$  (**10**) in  $\text{C}_6\text{D}_6$ .

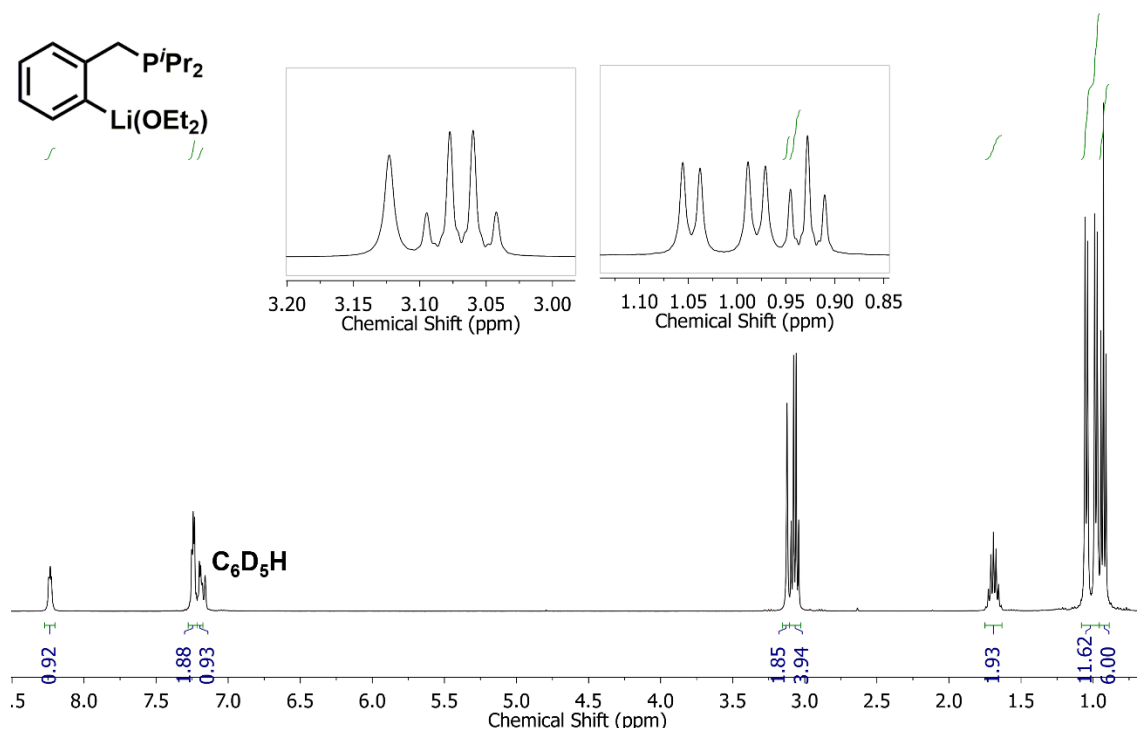

Figure S36.  $^1\text{H}\{^{31}\text{P}\}$  NMR spectrum of  $[\text{iPr}_2\text{PCH}_2(\text{C}_6\text{H}_4)\text{Li}(\text{OEt}_2)]_2$  (**10**) in  $\text{C}_6\text{D}_6$ .



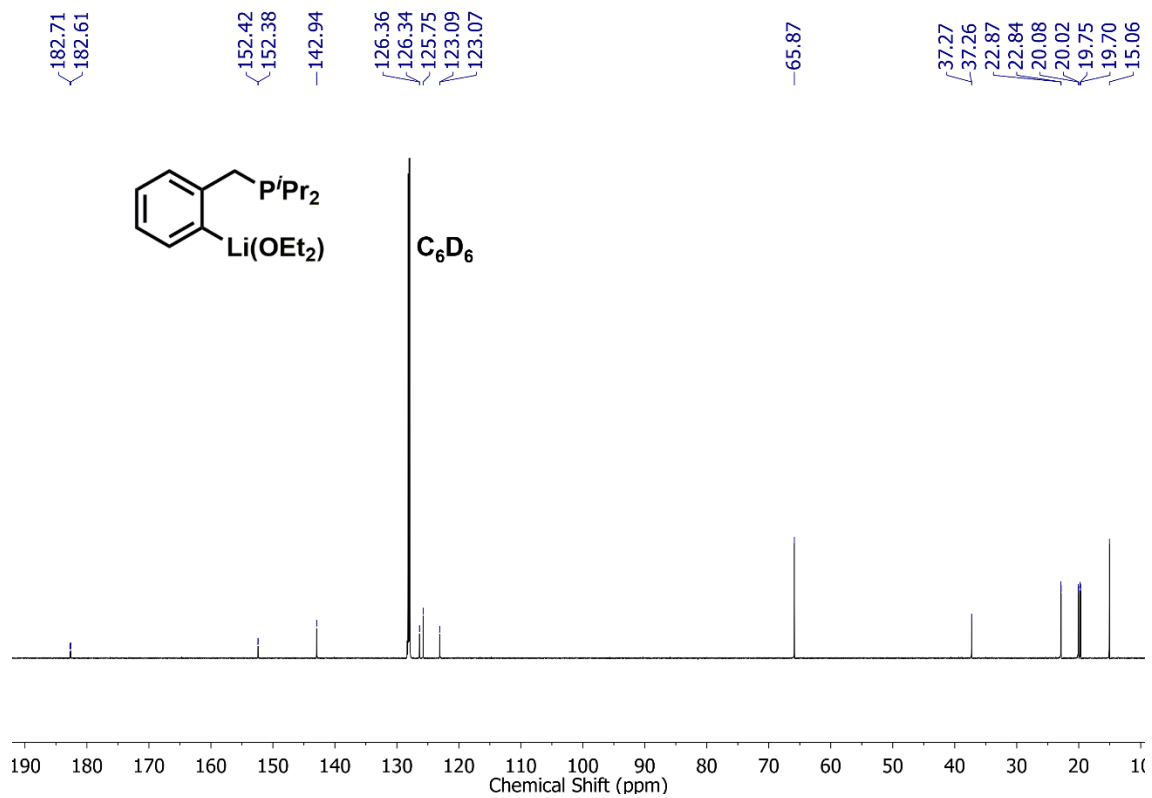

Figure S37.  $^{13}\text{C}\{^1\text{H}\}$  NMR spectrum of  $[\text{iPr}_2\text{PCH}_2(\text{C}_6\text{H}_4)\text{Li}(\text{OEt}_2)]_2$  (**10**) in  $\text{C}_6\text{D}_6$ .

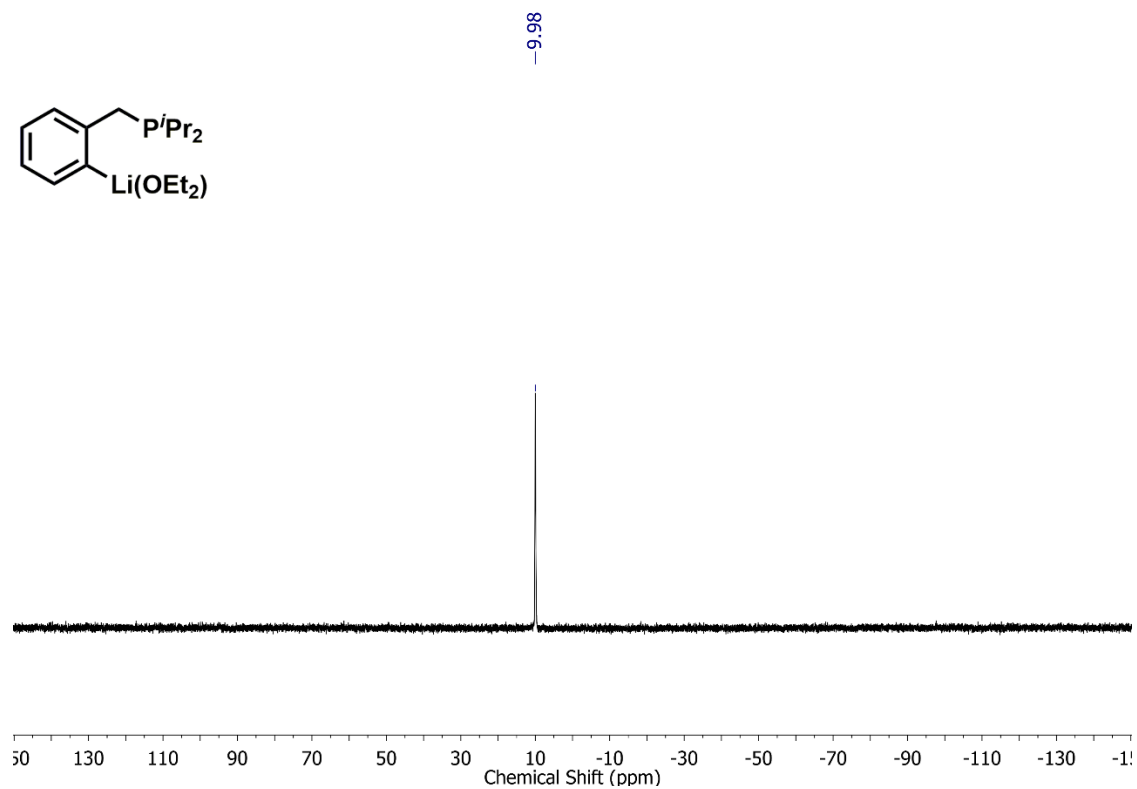

Figure S38.  $^{31}\text{P}\{^1\text{H}\}$  NMR spectrum of  $[\text{iPr}_2\text{PCH}_2(\text{C}_6\text{H}_4)\text{Li}(\text{OEt}_2)]_2$  (**10**) in  $\text{C}_6\text{D}_6$ .

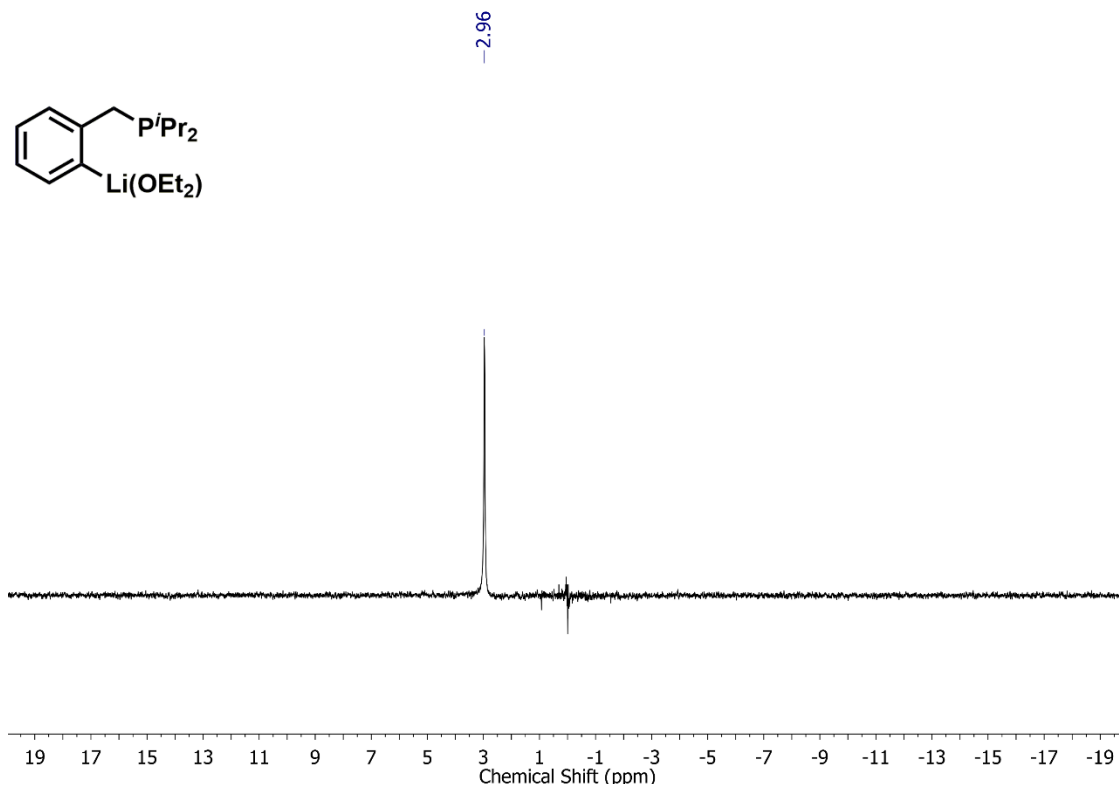

**Figure S39.**  $^7\text{Li}\{^1\text{H}\}$  NMR spectrum of  $[\text{iPr}_2\text{PCH}_2(\text{C}_6\text{H}_4)\text{Li}(\text{OEt}_2)]_2$  (**10**) in  $\text{C}_6\text{D}_6$ .

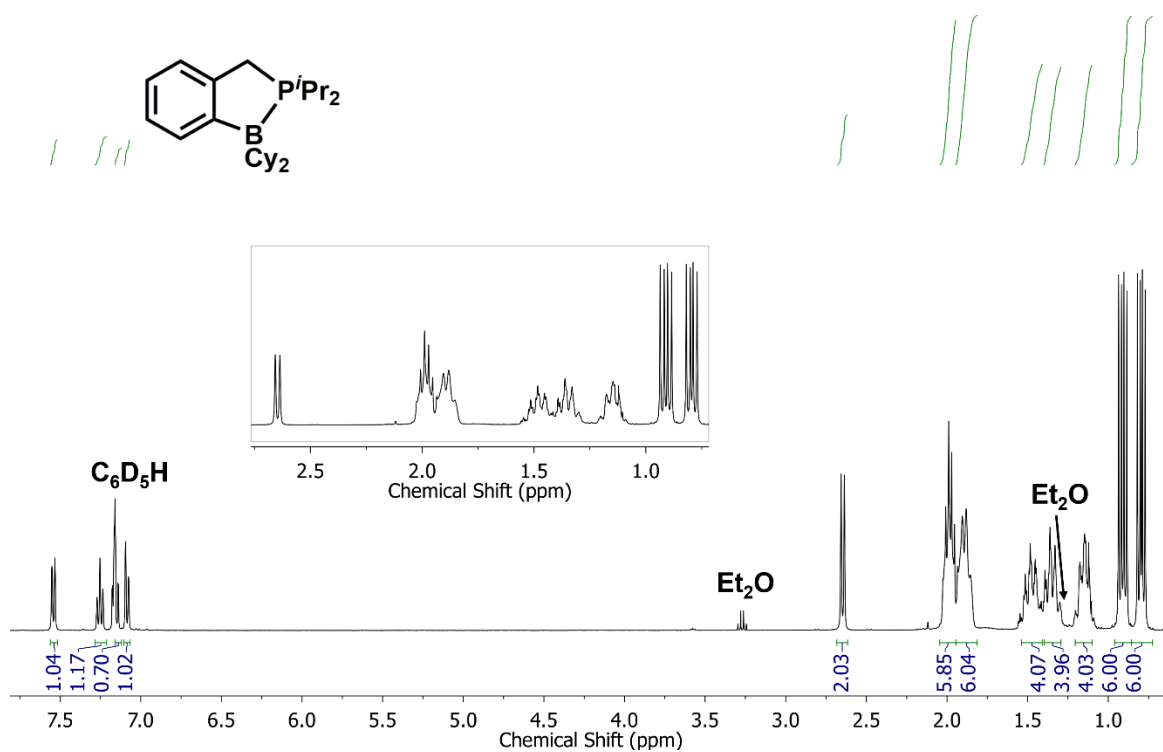

**Figure S40.**  $^1\text{H}$  NMR spectrum of  $\text{iPr}_2\text{PCH}_2(\text{C}_6\text{H}_4)\text{BCy}_2$  ( $\text{CH}_2\text{PB}$ ) in  $\text{C}_6\text{D}_6$ .

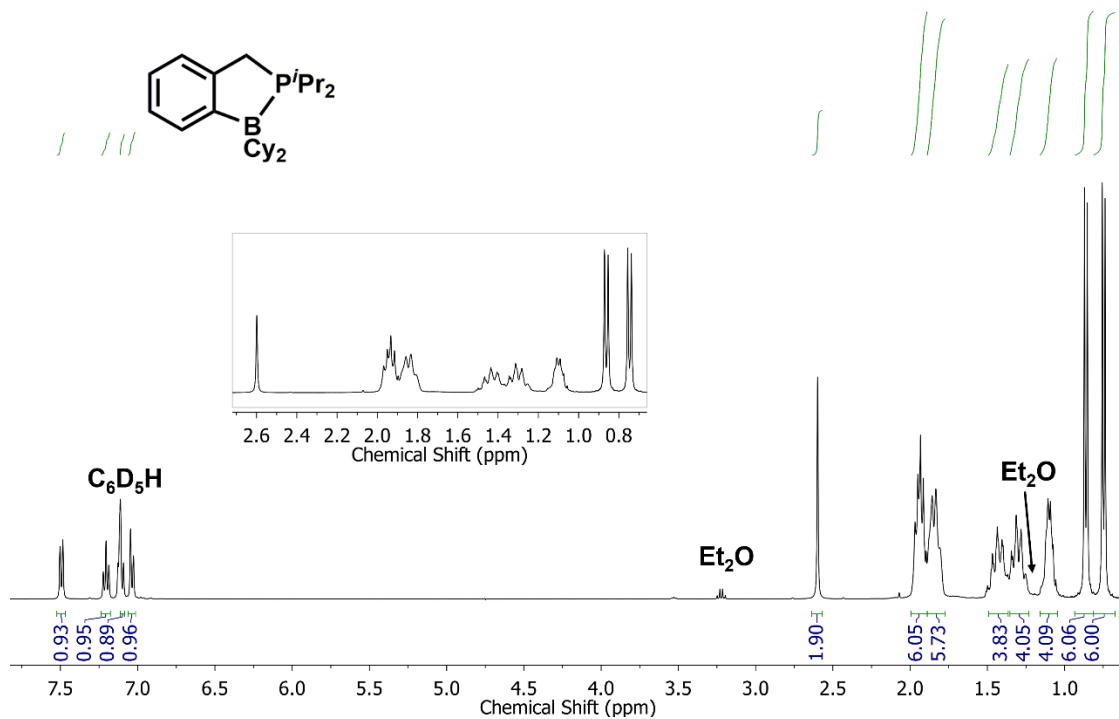

Figure S41.  $^1\text{H}\{^{31}\text{P}\}$  NMR spectrum of  $i\text{Pr}_2\text{PCH}_2(\text{C}_6\text{H}_4)\text{BCy}_2$  ( $\text{CH}_2\text{PB}$ ) in  $\text{C}_6\text{D}_6$ .

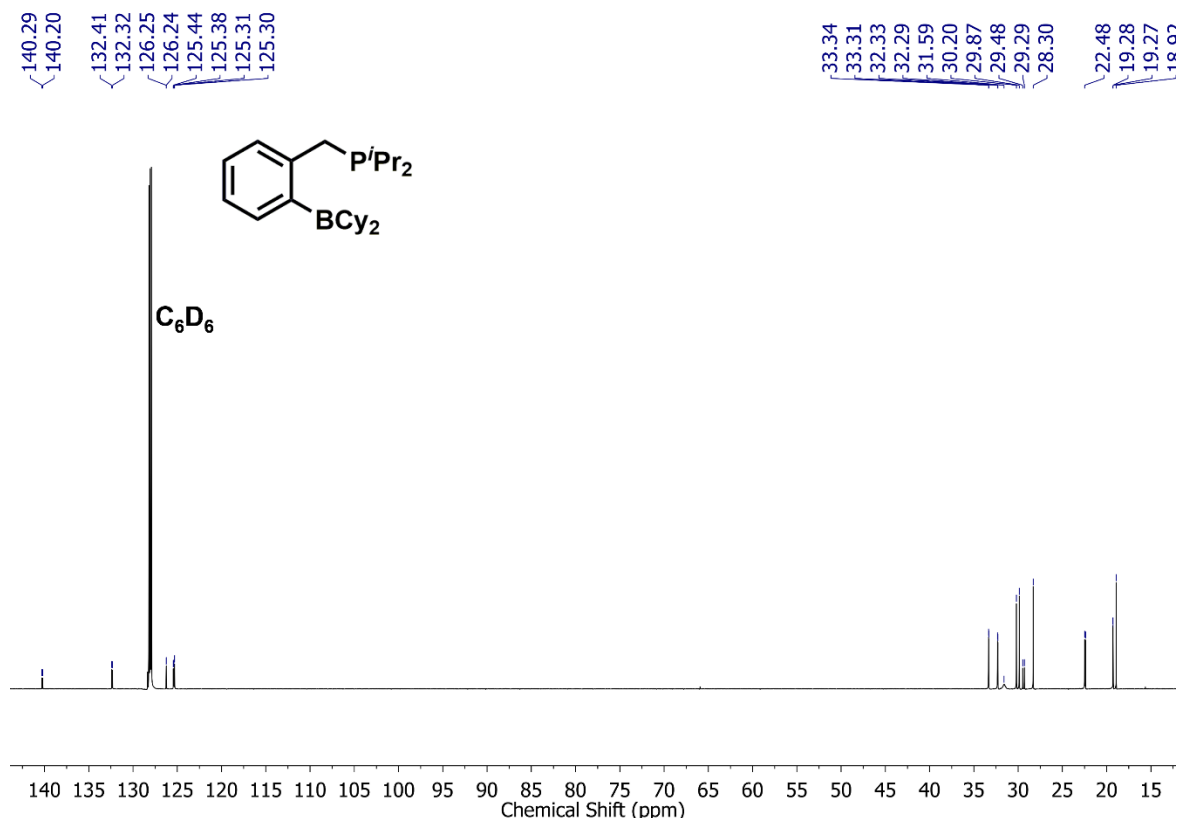

Figure S42.  $^{13}\text{C}\{^1\text{H}\}$  NMR spectrum of  $i\text{Pr}_2\text{PCH}_2(\text{C}_6\text{H}_4)\text{BCy}_2$  ( $\text{CH}_2\text{PB}$ ) in  $\text{C}_6\text{D}_6$ .

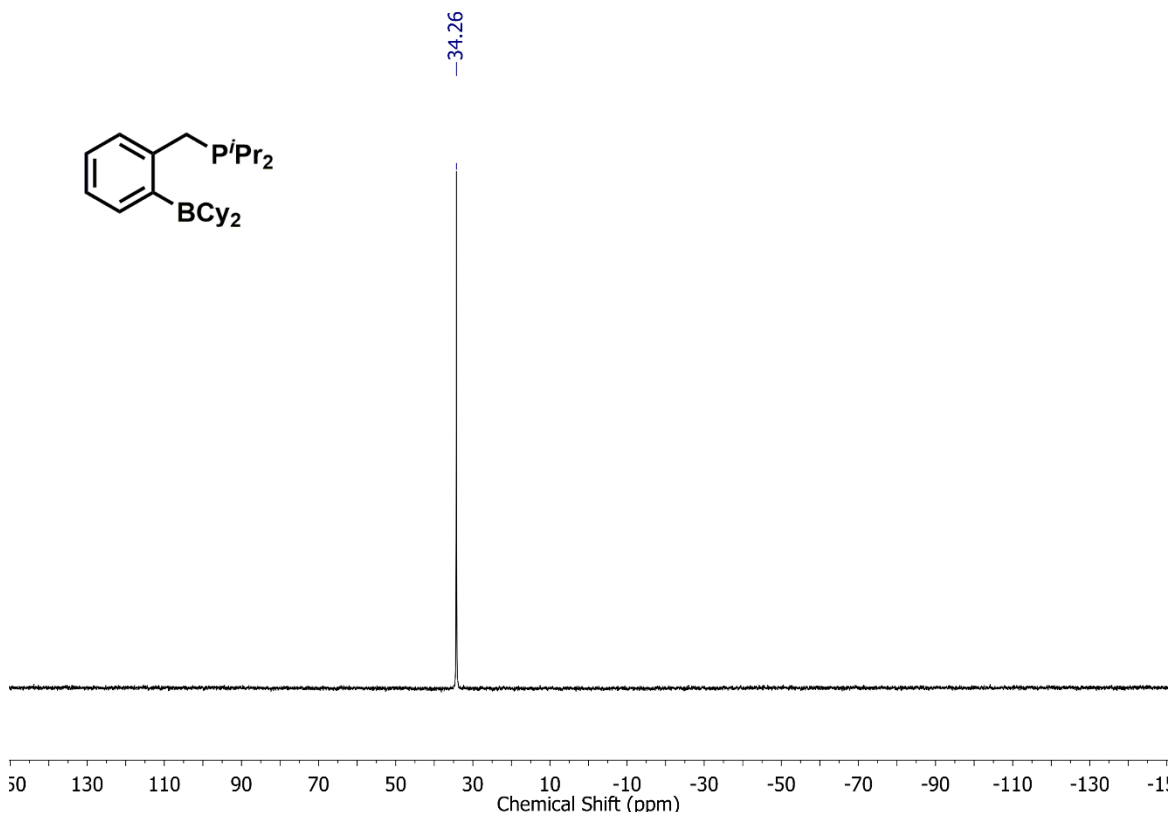

Figure S43.  $^{31}\text{P}\{^1\text{H}\}$  NMR spectrum of  $i\text{Pr}_2\text{PCH}_2(\text{C}_6\text{H}_4)\text{BCy}_2$  ( $\text{CH}_2\text{PB}$ ) in  $\text{C}_6\text{D}_6$ .

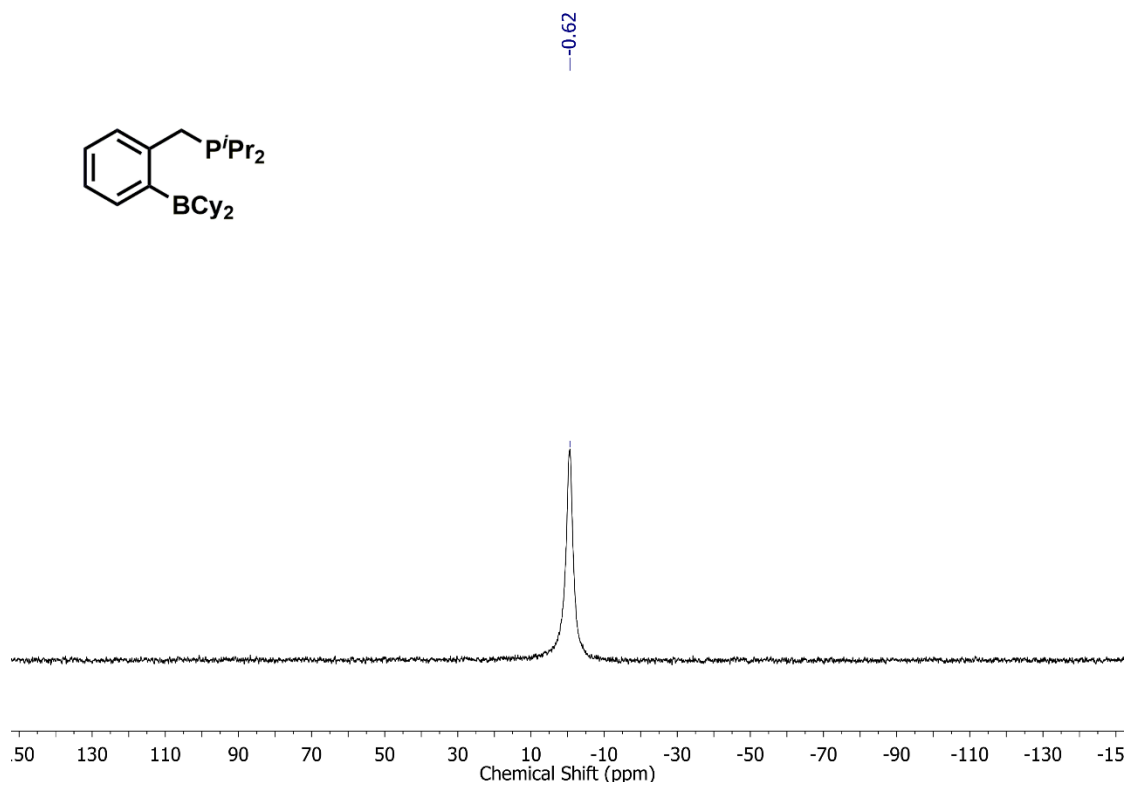

Figure S44.  $^{11}\text{B}\{^1\text{H}\}$  NMR spectrum of  $i\text{Pr}_2\text{PCH}_2(\text{C}_6\text{H}_4)\text{BCy}_2$  ( $\text{CH}_2\text{PB}$ ) in  $\text{C}_6\text{D}_6$ .

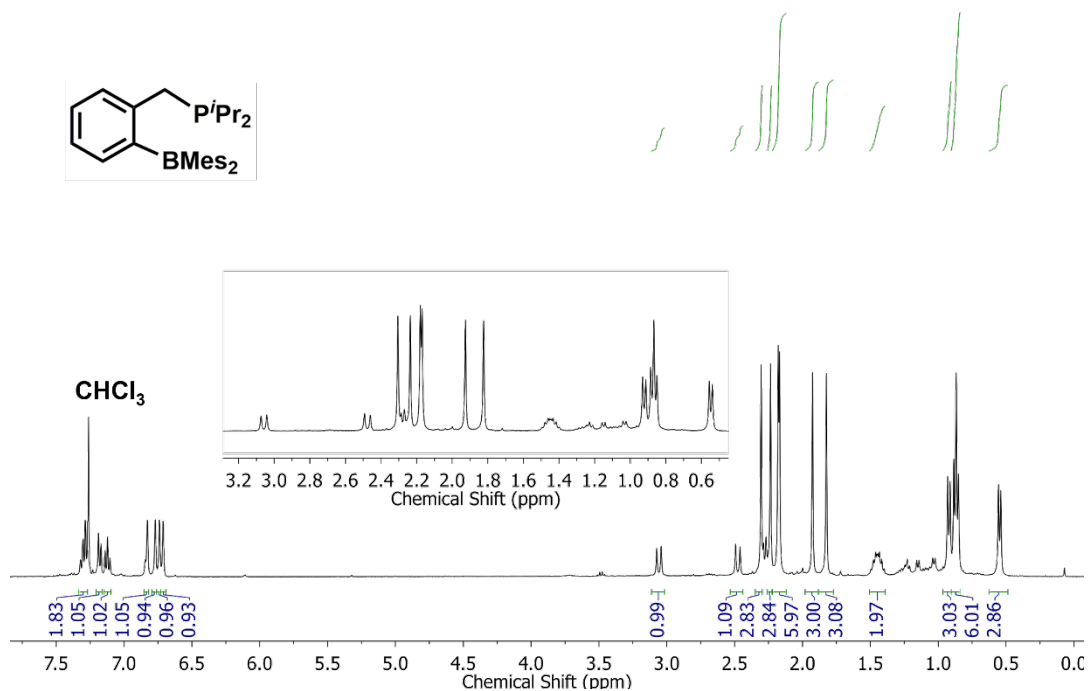

Figure S45.  $^1\text{H}\{^{31}\text{P}\}$  NMR spectrum of  $i\text{Pr}_2\text{PCH}_2(\text{C}_6\text{H}_4)\text{BMe}_2$  ( $\text{CH}_2\text{PB}_{\text{Mes}}$ ) in  $\text{CDCl}_3$  collected at  $-40\text{ }^\circ\text{C}$ .

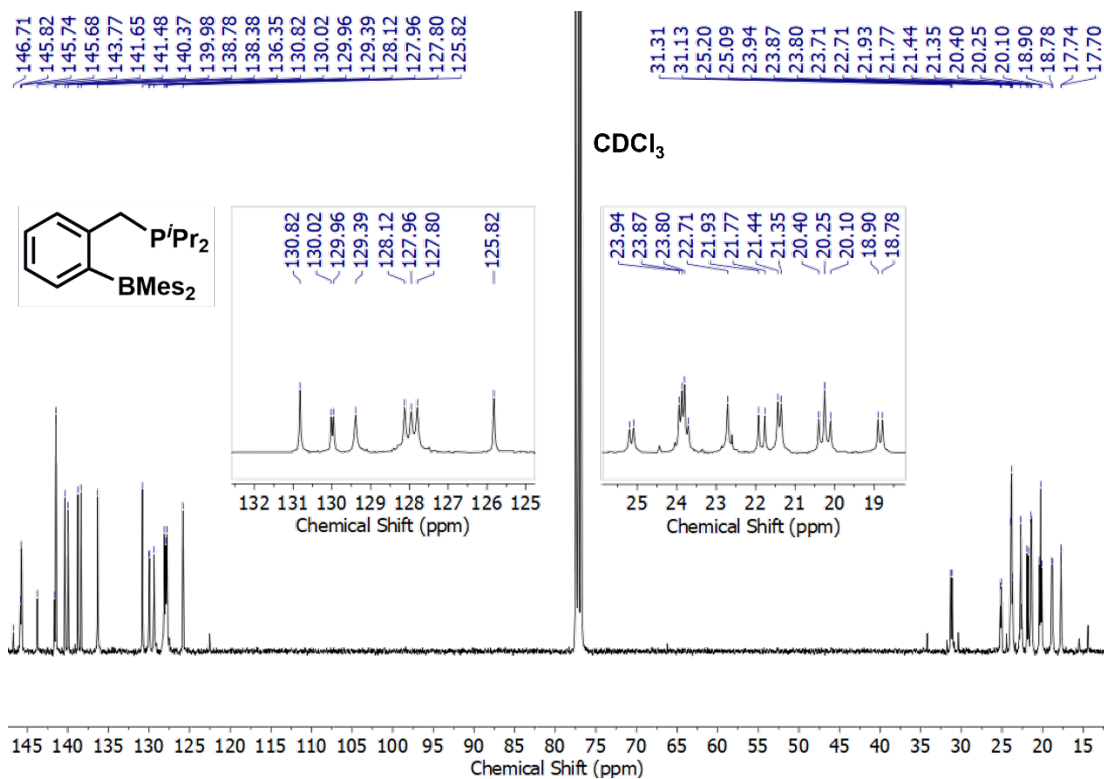

Figure S46.  $^{13}\text{C}\{^1\text{H}\}$  NMR spectrum of  $i\text{Pr}_2\text{PCH}_2(\text{C}_6\text{H}_4)\text{BMe}_2$  ( $\text{CH}_2\text{PB}_{\text{Mes}}$ ) in  $\text{CDCl}_3$  collected at  $-40\text{ }^\circ\text{C}$ .

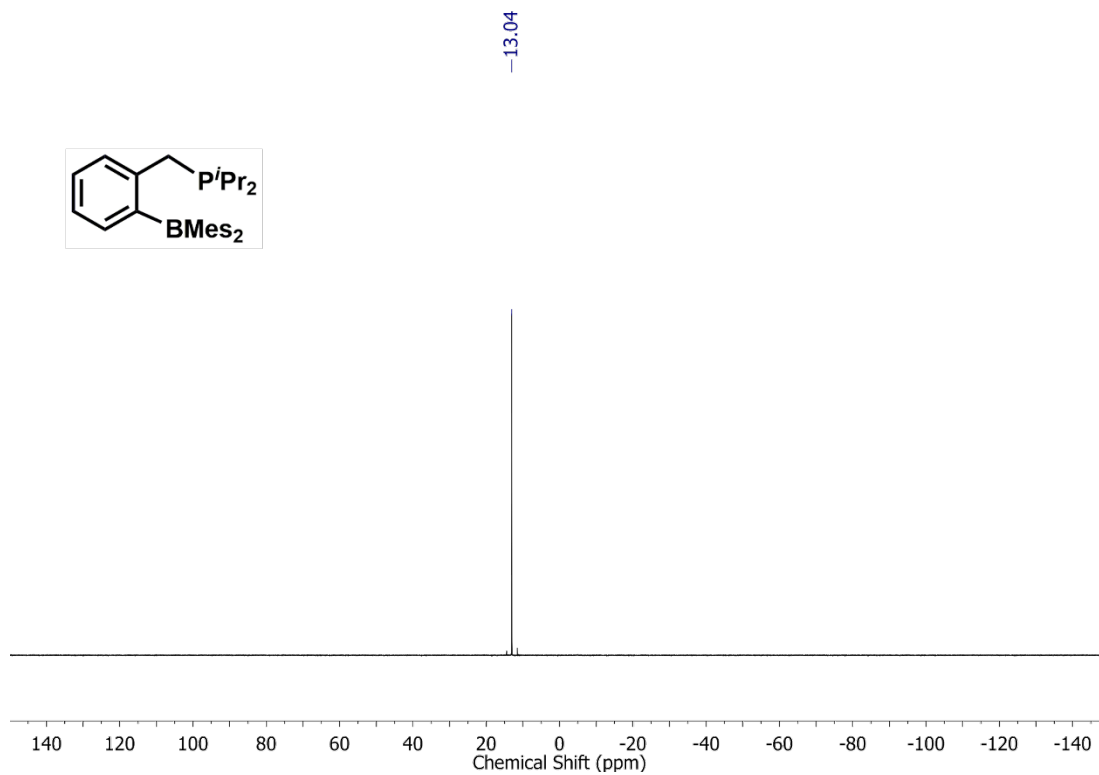

Figure S47.  $^{31}\text{P}\{^1\text{H}\}$  NMR spectrum of  $i\text{Pr}_2\text{PCH}_2(\text{C}_6\text{H}_4)\text{BMe}_2$  ( $^{\text{CH}_2}\text{PB}_{\text{Mes}}$ ) in  $\text{CDCl}_3$  collected at  $-40\text{ }^\circ\text{C}$ .

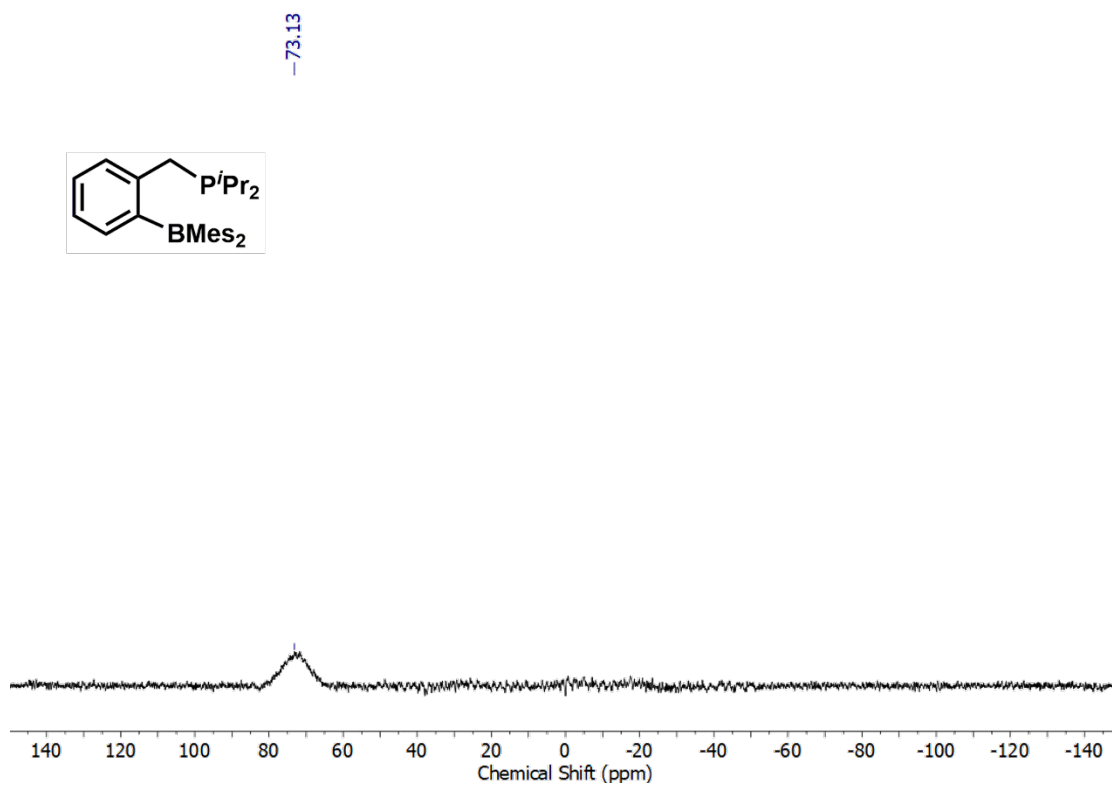

Figure S48.  $^{11}\text{B}\{^1\text{H}\}$  NMR spectrum of  $i\text{Pr}_2\text{PCH}_2(\text{C}_6\text{H}_4)\text{BMe}_2$  ( $^{\text{CH}_2}\text{PB}_{\text{Mes}}$ ) in  $\text{CDCl}_3$  collected at  $25\text{ }^\circ\text{C}$ .

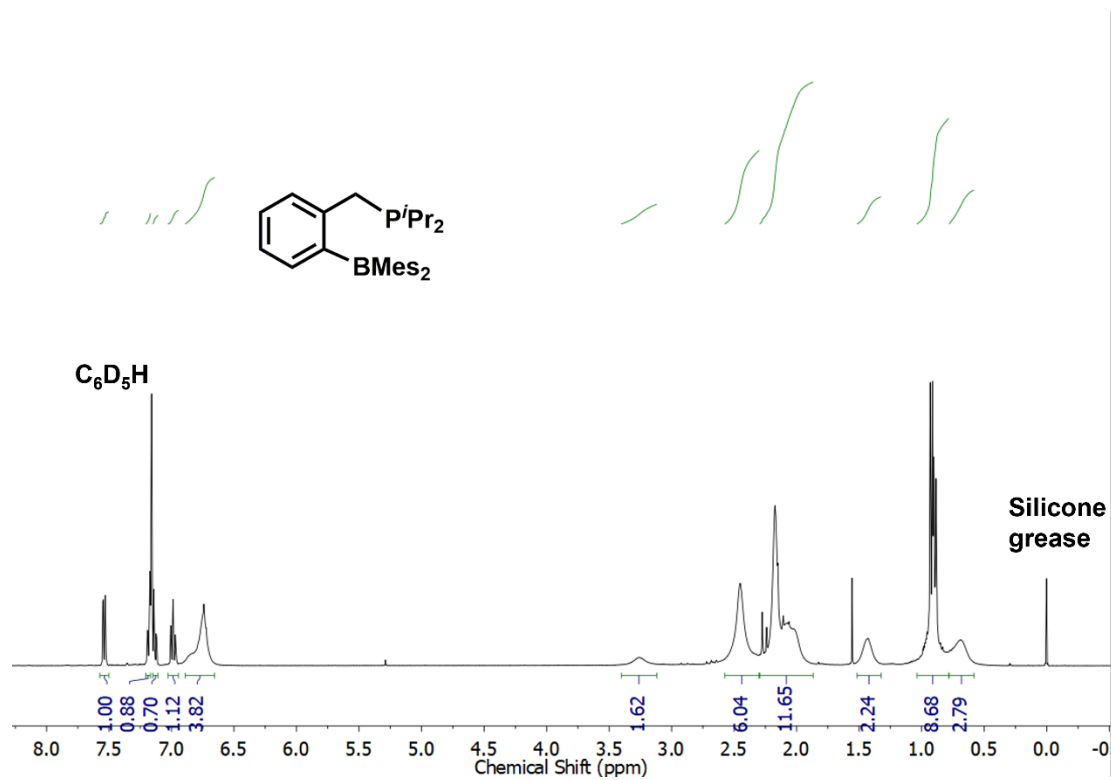

Figure S49.  $^1\text{H}$  NMR spectrum of  $i\text{Pr}_2\text{PCH}_2(\text{C}_6\text{H}_4)\text{BMe}_2$  ( $\text{CH}_2\text{PB}_{\text{Mes}}$ ) in  $\text{C}_6\text{D}_6$  collected at 25 °C.

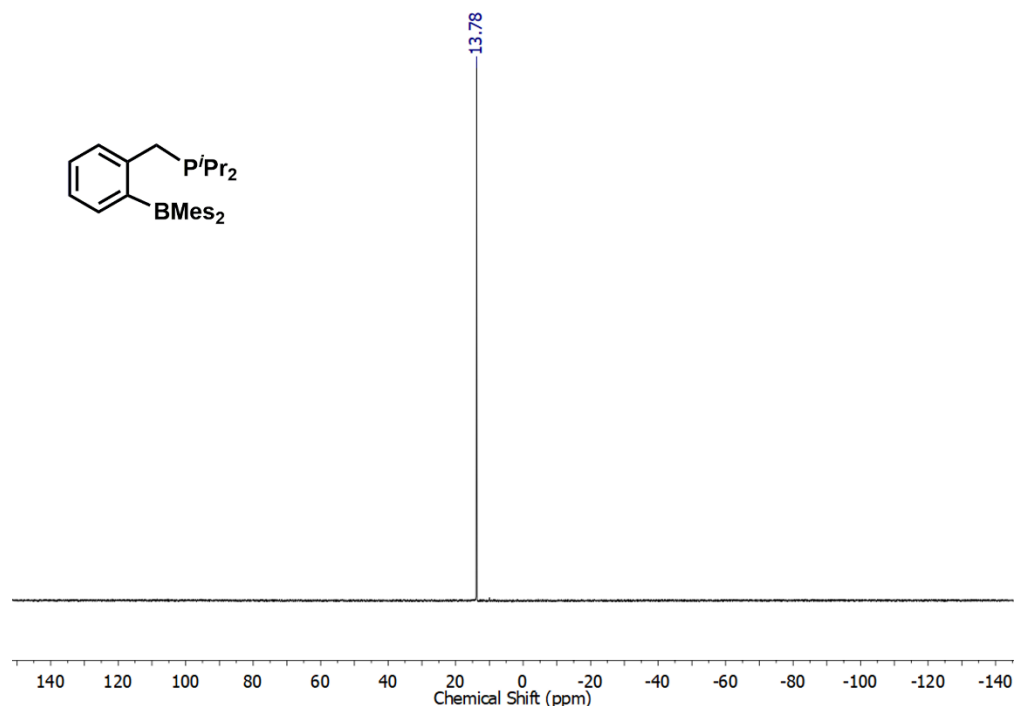

Figure S50.  $^{31}\text{P}\{^1\text{H}\}$  NMR spectrum of  $i\text{Pr}_2\text{PCH}_2(\text{C}_6\text{H}_4)\text{BMe}_2$  ( $\text{CH}_2\text{PB}_{\text{Mes}}$ ) in  $\text{C}_6\text{D}_6$  collected at 25 °C.

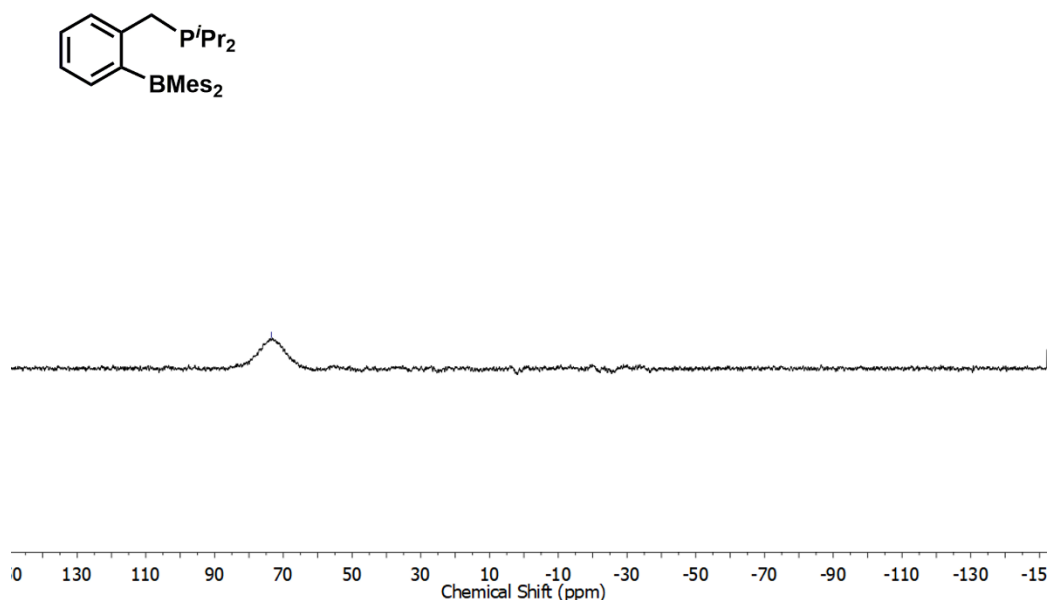

Figure S51.  $^{11}\text{B}\{^1\text{H}\}$  NMR spectrum of  $i\text{Pr}_2\text{PCH}_2(\text{C}_6\text{H}_4)\text{BMe}_2$  ( $^{\text{CH}_2}\text{PB}_{\text{Mes}}$ ) in  $\text{C}_6\text{D}_6$  collected at 25 °C.

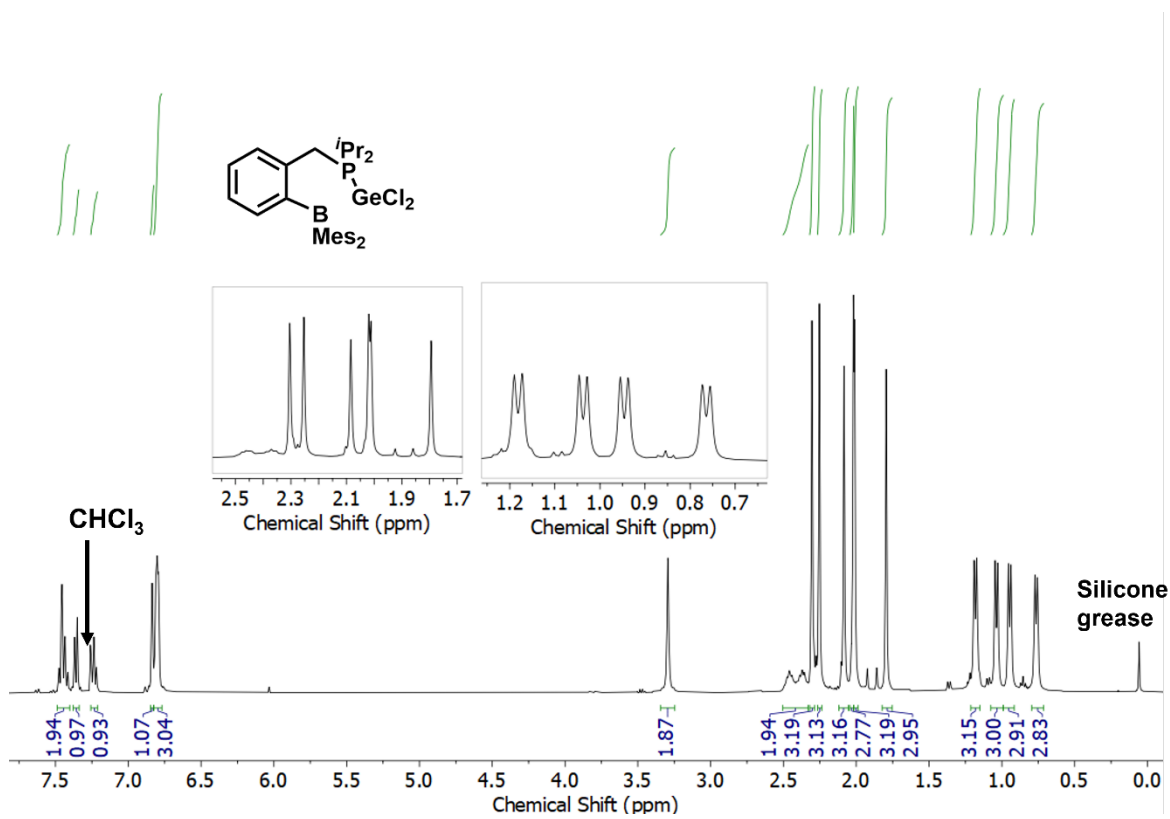

Figure S52.  $^1\text{H}\{^{31}\text{P}\}$  NMR spectrum of  $[i\text{Pr}_2\text{PCH}_2(\text{C}_6\text{H}_4)\text{BMe}_2\{\text{GeCl}_2\}]$  (**11**) in  $\text{CDCl}_3$  collected at -40 °C.



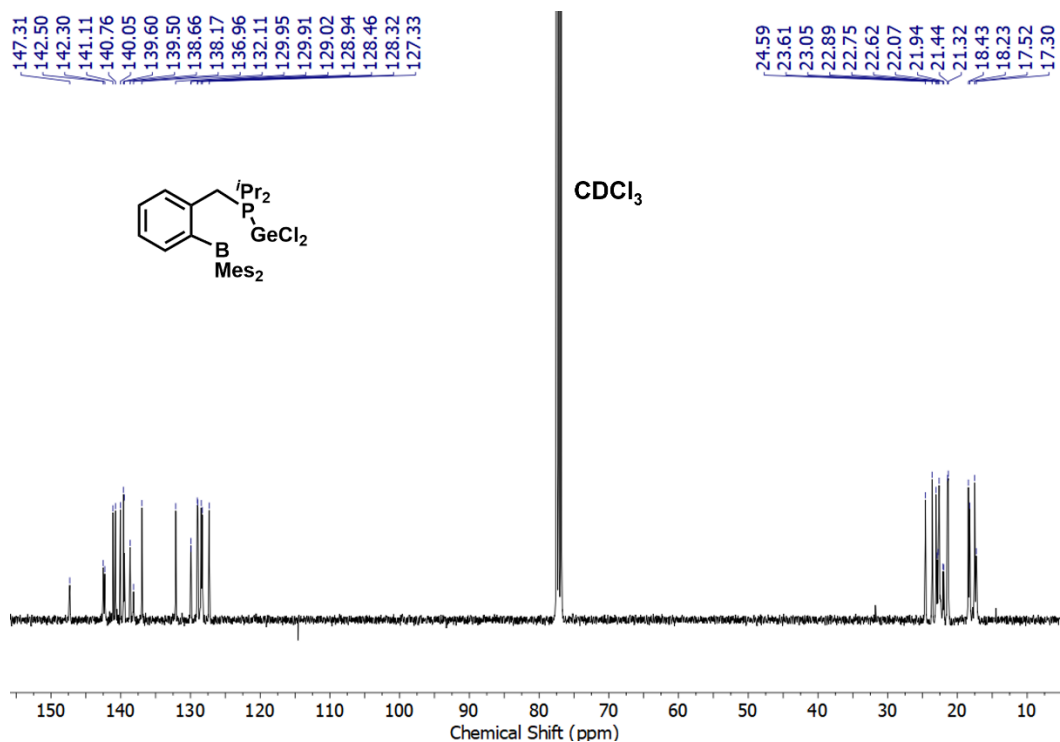

**Figure S53.**  $^{13}\text{C}\{^1\text{H}\}$  NMR spectrum of  $[i\text{Pr}_2\text{PCH}_2(\text{C}_6\text{H}_4)\text{BMes}_2\{\text{GeCl}_2\}]$  (**11**) in  $\text{CDCl}_3$  collected at  $-40\text{ }^\circ\text{C}$ .

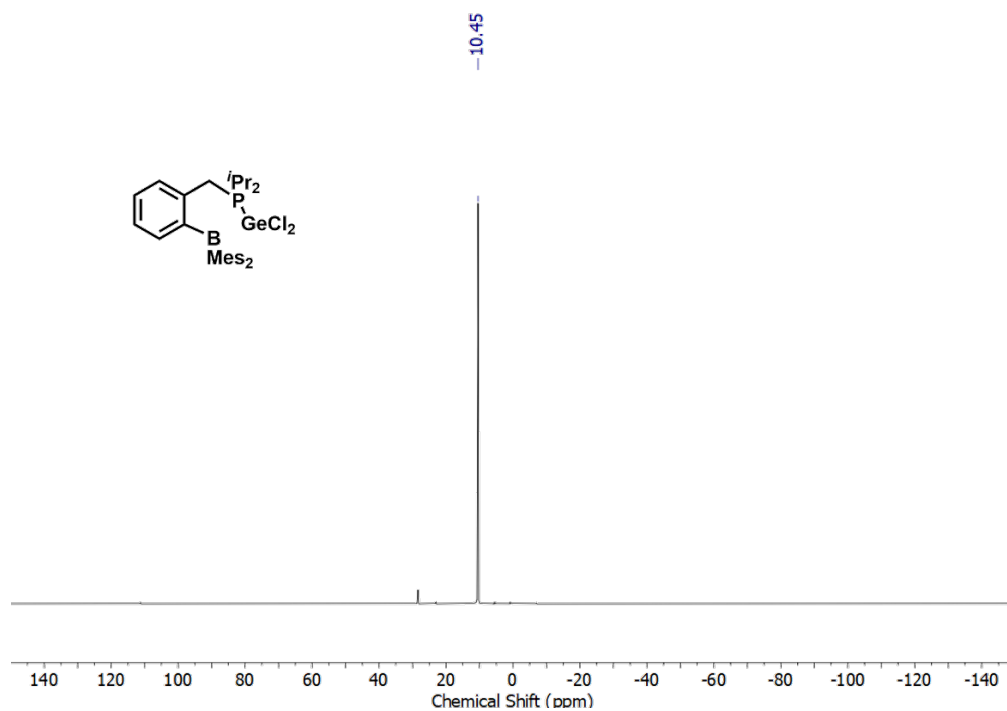

**Figure S54.**  $^{31}\text{P}\{^1\text{H}\}$  NMR spectrum of  $[i\text{Pr}_2\text{PCH}_2(\text{C}_6\text{H}_4)\text{BMes}_2\{\text{GeCl}_2\}]$  (**11**) in  $\text{CDCl}_3$  collected at  $-40\text{ }^\circ\text{C}$ . The  $^{31}\text{P}$  resonance near 28 ppm has been tentatively assigned as  $[i\text{Pr}_2\text{PCH}_2(\text{C}_6\text{H}_4)\text{BMes}_2\{\text{HCl}\}]$  from protonolysis of  $\text{CH}_2\text{PB}_{\text{Mes}}$ , since the peak appears as a doublet in the  $^{31}\text{P}$  NMR spectrum.

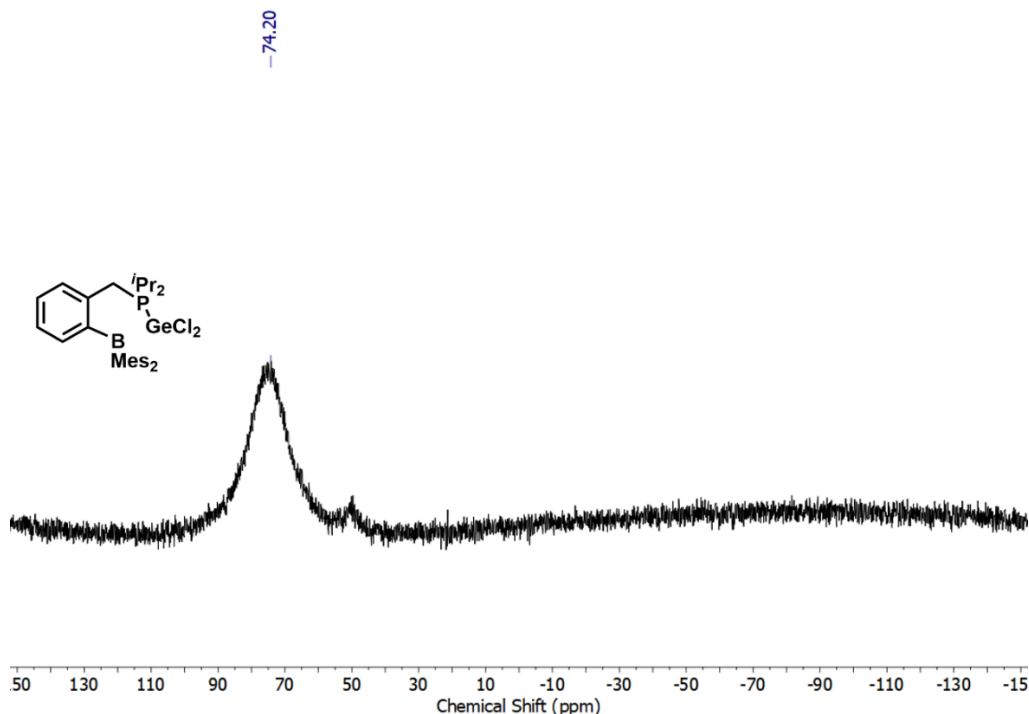

**Figure S55.**  $^{11}\text{B}\{^1\text{H}\}$  NMR spectrum of  $[\text{iPr}_2\text{PCH}_2(\text{C}_6\text{H}_4)\text{BMe}_2\{\text{GeCl}_2\}]$  (**11**) in  $\text{CDCl}_3$  collected at  $-40^\circ\text{C}$ .

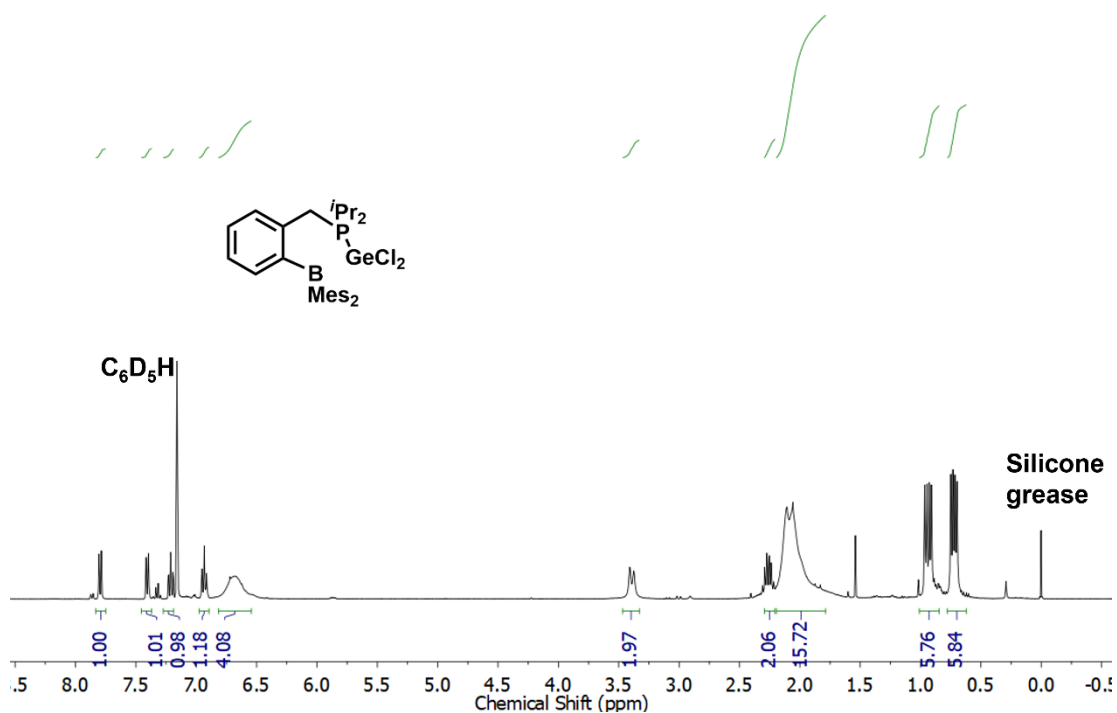

**Figure S56.**  $^1\text{H}$  NMR spectrum of  $[\text{iPr}_2\text{PCH}_2(\text{C}_6\text{H}_4)\text{BMe}_2\{\text{GeCl}_2\}]$  (**11**) in  $\text{C}_6\text{D}_6$  at  $25^\circ\text{C}$ . Note that the integration of the  $\text{Mes-CH}_3$  (m, 1.87-2.19) is often undercalculated at 16H (instead of 18H) due to significant broadening.

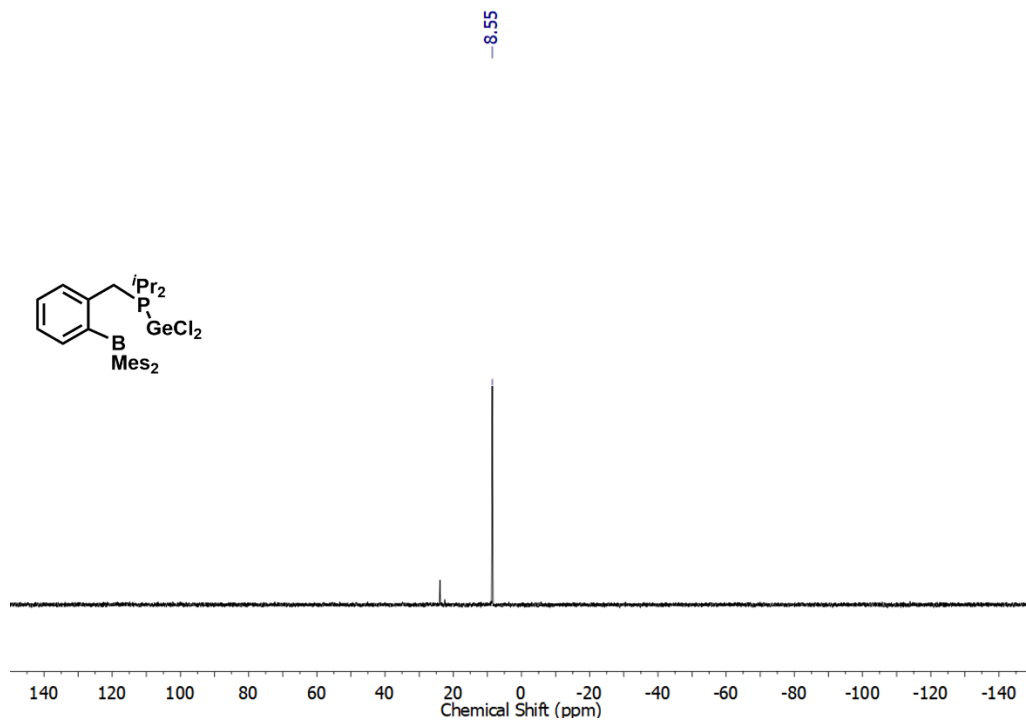

Figure S57.  $^{31}\text{P}\{^1\text{H}\}$  NMR spectrum of  $[i\text{Pr}_2\text{PCH}_2(\text{C}_6\text{H}_4)\text{BMe}_2\{\text{GeCl}_2\}]$  (**11**) in  $\text{C}_6\text{D}_6$  at 25 °C.

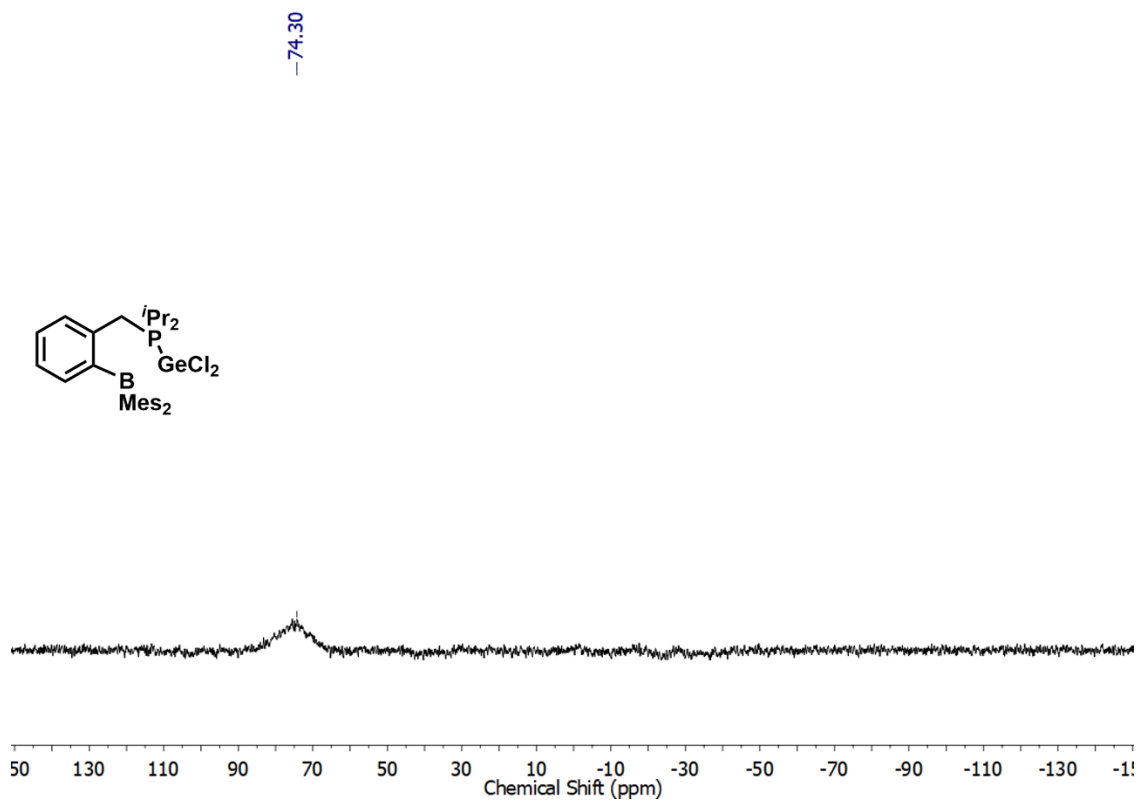

Figure S58.  $^{11}\text{B}\{^1\text{H}\}$  NMR spectrum of  $[i\text{Pr}_2\text{PCH}_2(\text{C}_6\text{H}_4)\text{BMe}_2\{\text{GeCl}_2\}]$  (**11**) in  $\text{C}_6\text{D}_6$  at 25 °C.

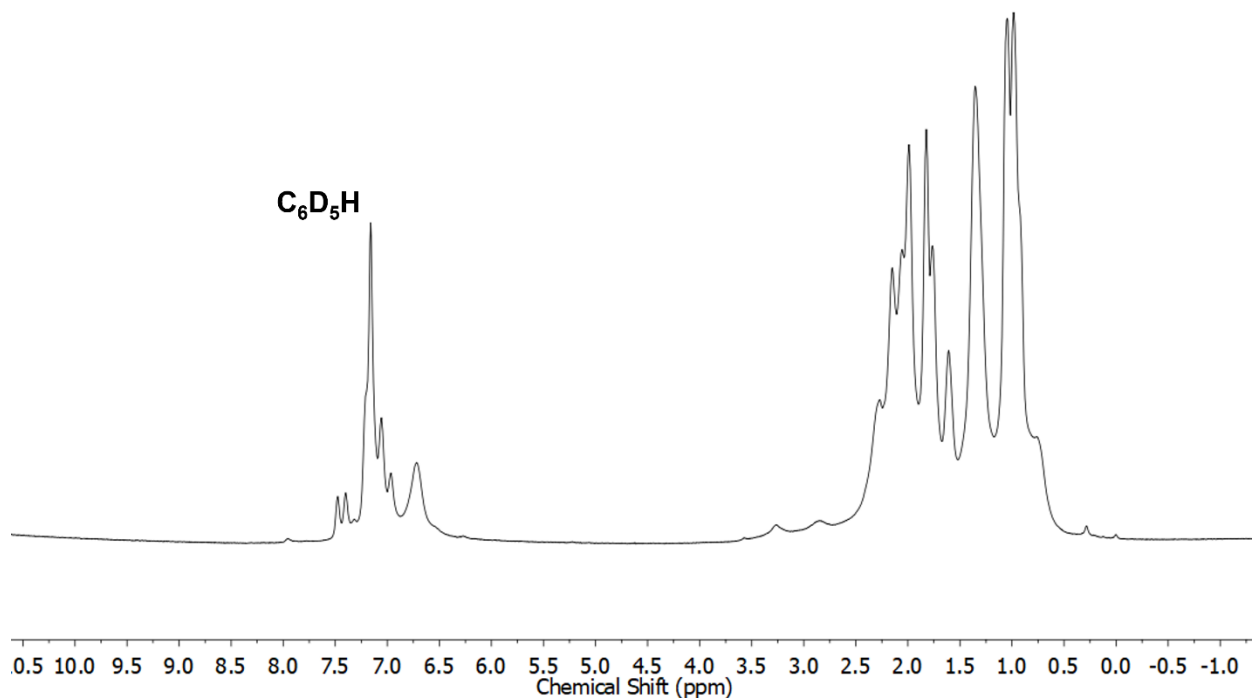

**Figure S59.**  $^1\text{H}$  NMR spectrum of the crude reaction mixture from the combination of  $[\text{Pr}_2\text{PCH}_2(\text{C}_6\text{H}_4)\text{BMes}_2\{\text{GeCl}_2\}]$  (**11**) with **PB** in  $\text{C}_6\text{D}_6$ . The  $^1\text{H}$  NMR data is not consistent with that of free **11**, **PB**,  $[\text{PB}\{\text{GeCl}_2\}]^{\text{S7}}$  or  $^{\text{CH}_2}\text{PB}_{\text{Mes}}$ , thus an equilibrium mixture is likely present.

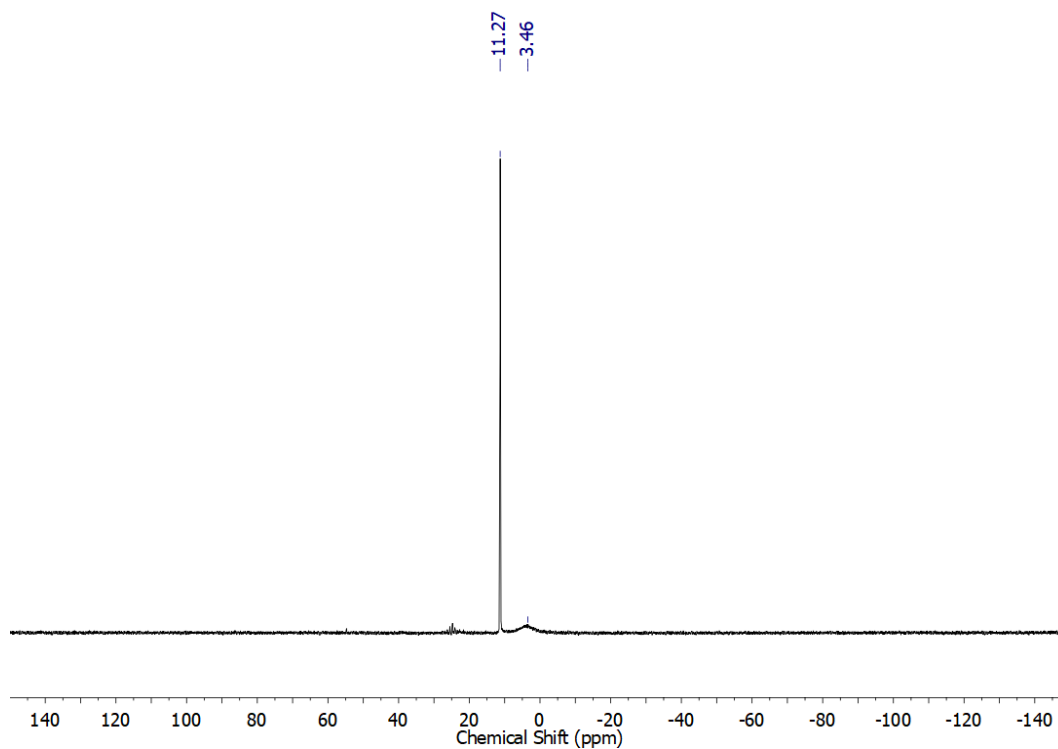

**Figure S60.**  $^{31}\text{P}\{^1\text{H}\}$  NMR spectrum of the crude reaction mixture from the combination of  $[\text{Pr}_2\text{PCH}_2(\text{C}_6\text{H}_4)\text{BMes}_2\{\text{GeCl}_2\}]$  (**11**) with **PB** in  $\text{C}_6\text{D}_6$ .

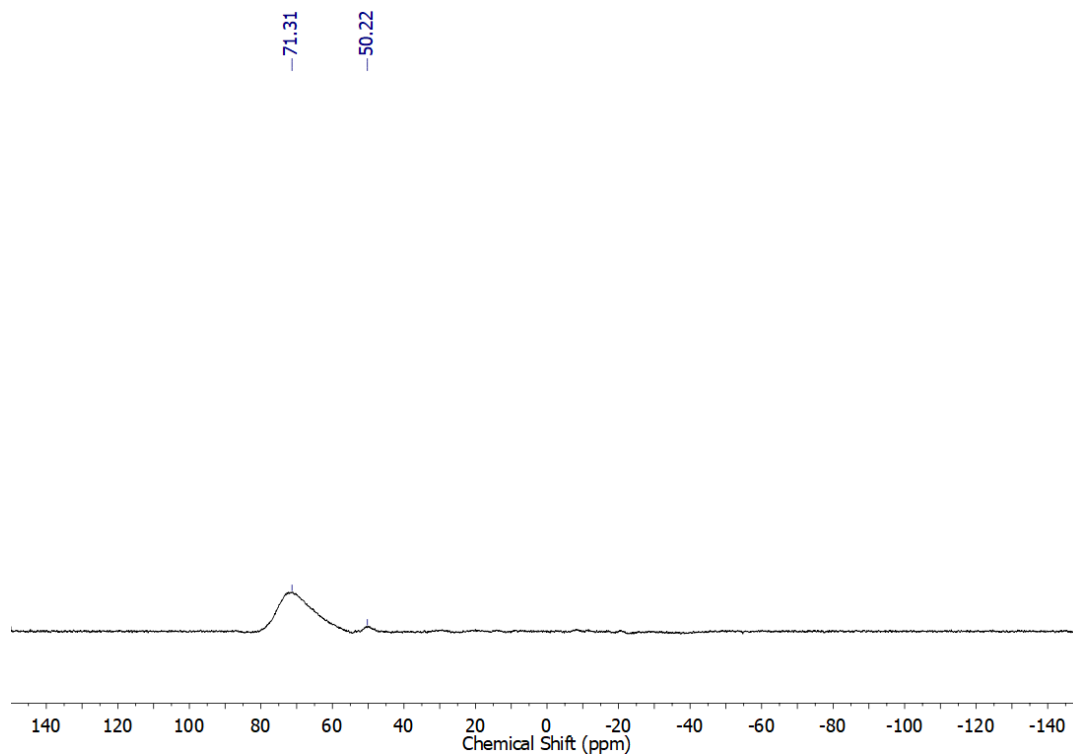

**Figure S61.**  $^{11}\text{B}\{^1\text{H}\}$  NMR spectrum of the crude reaction mixture from the combination of  $[\text{iPr}_2\text{PCH}_2(\text{C}_6\text{H}_4)\text{BMes}_2\{\text{GeCl}_2\}]$  (**11**) with **PB** in  $\text{C}_6\text{D}_6$ .

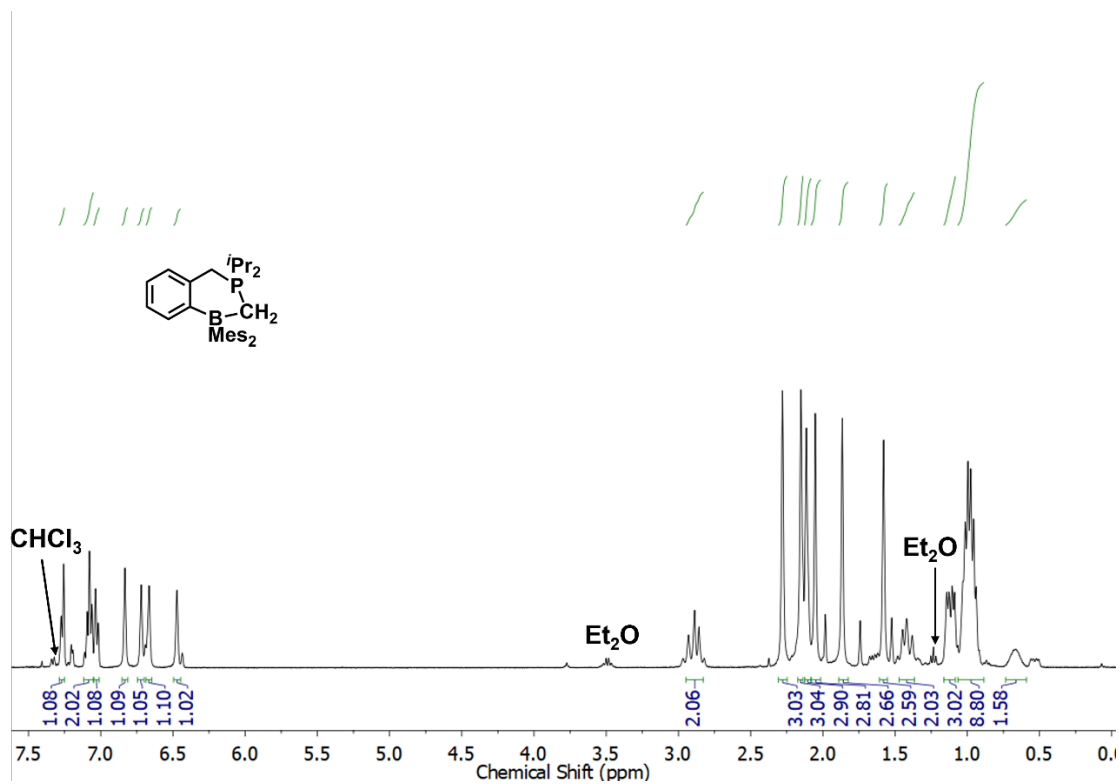

**Figure S62.**  $^1\text{H}$  NMR spectrum of  $[\text{iPr}_2\text{PCH}_2(\text{C}_6\text{H}_4)\text{BMes}_2\{\text{CH}_2\}]$  (**13**) in  $\text{CDCl}_3$  collected at  $-60^\circ\text{C}$ .

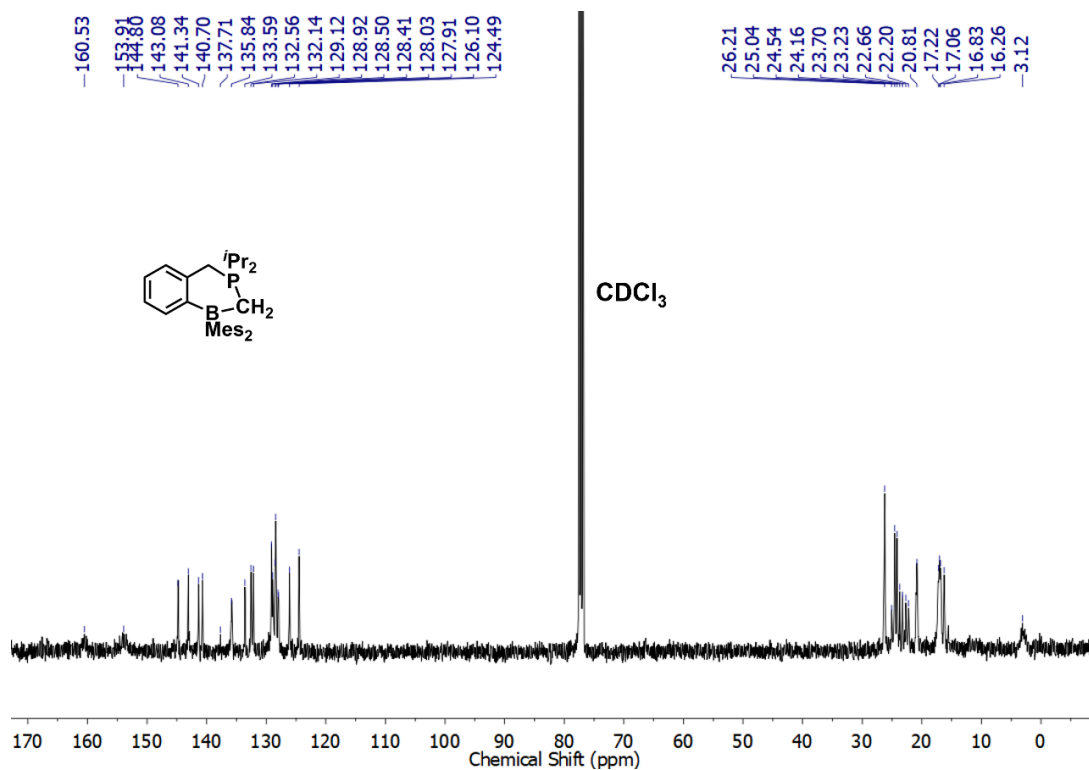

**Figure S63.**  $^{13}\text{C}\{^1\text{H}\}$  NMR spectrum of  $[\text{iPr}_2\text{PCH}_2(\text{C}_6\text{H}_4)\text{BMe}_2\{\text{CH}_2\}]$  (**13**) in  $\text{CDCl}_3$  collected at  $-60^\circ\text{C}$ .

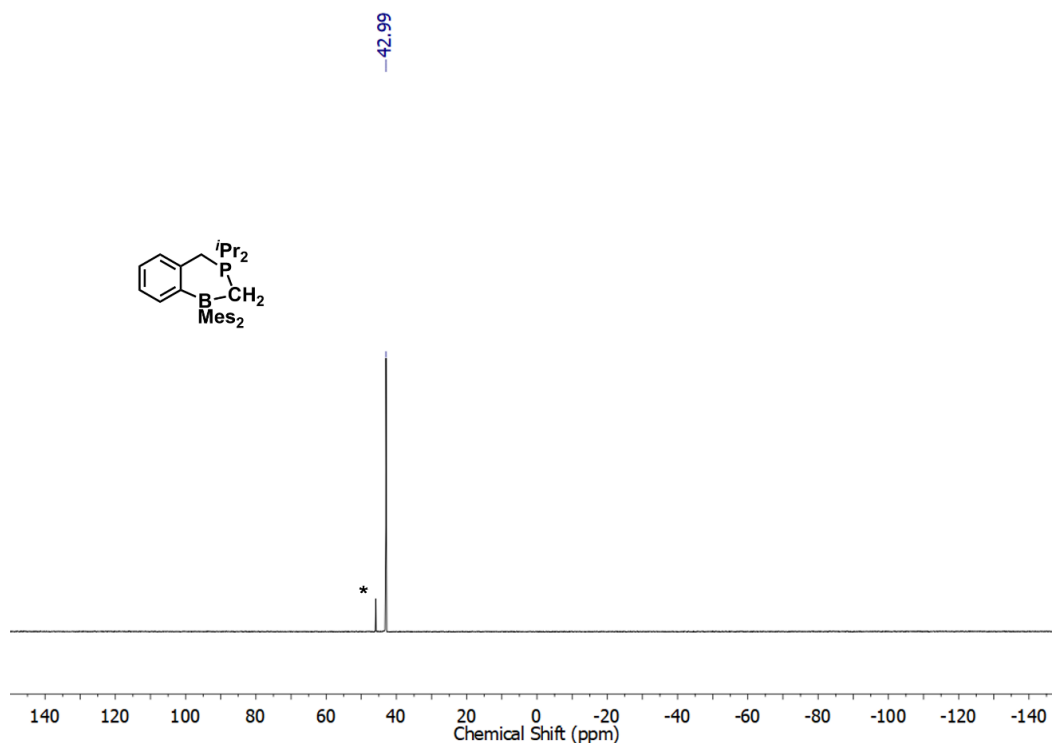

**Figure S64.**  $^{31}\text{P}\{^1\text{H}\}$  NMR spectrum of  $[\text{iPr}_2\text{PCH}_2(\text{C}_6\text{H}_4)\text{BMe}_2\{\text{CH}_2\}]$  (**13**) in  $\text{CDCl}_3$  collected at  $25^\circ\text{C}$ . The  $^{31}\text{P}$  resonance labelled with an asterisk (\*) is a minor  $[\text{iPr}_2\text{PCH}_2(\text{C}_6\text{H}_4)\text{BMe}_2\{\text{MeOTf}\}]$  impurity, the identity of which was confirmed upon multinuclear ( $^1\text{H}$ ,  $^{31}\text{P}\{^1\text{H}\}$ ,  $^{11}\text{B}\{^1\text{H}\}$ ,  $^{19}\text{F}\{^1\text{H}\}$ ) NMR spectroscopy tracking of the reaction mixture between  $\text{CH}_2\text{PB}_{\text{Mes}}$  and MeOTf over time.

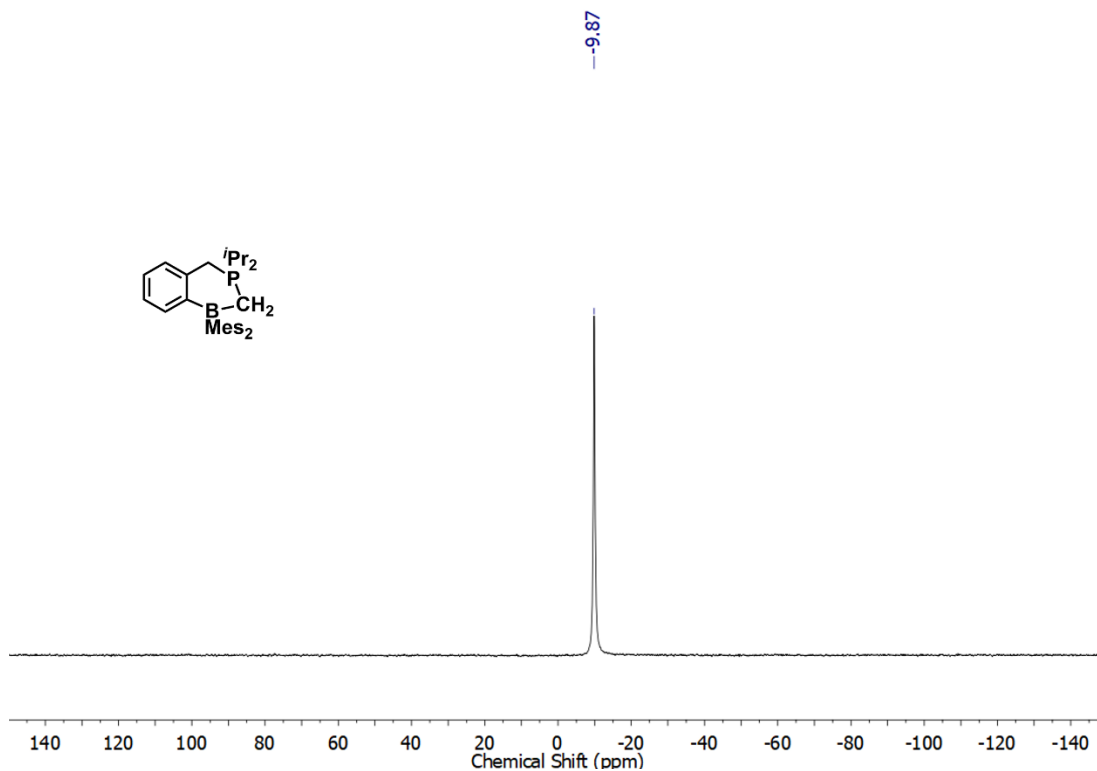

**Figure S65.**  $^{11}\text{B}\{^1\text{H}\}$  NMR spectrum of  $[\text{iPr}_2\text{PCH}_2(\text{C}_6\text{H}_4)\text{BMes}_2\{\text{CH}_2\}]$  (**13**) in  $\text{CDCl}_3$  collected at  $25^\circ\text{C}$ .

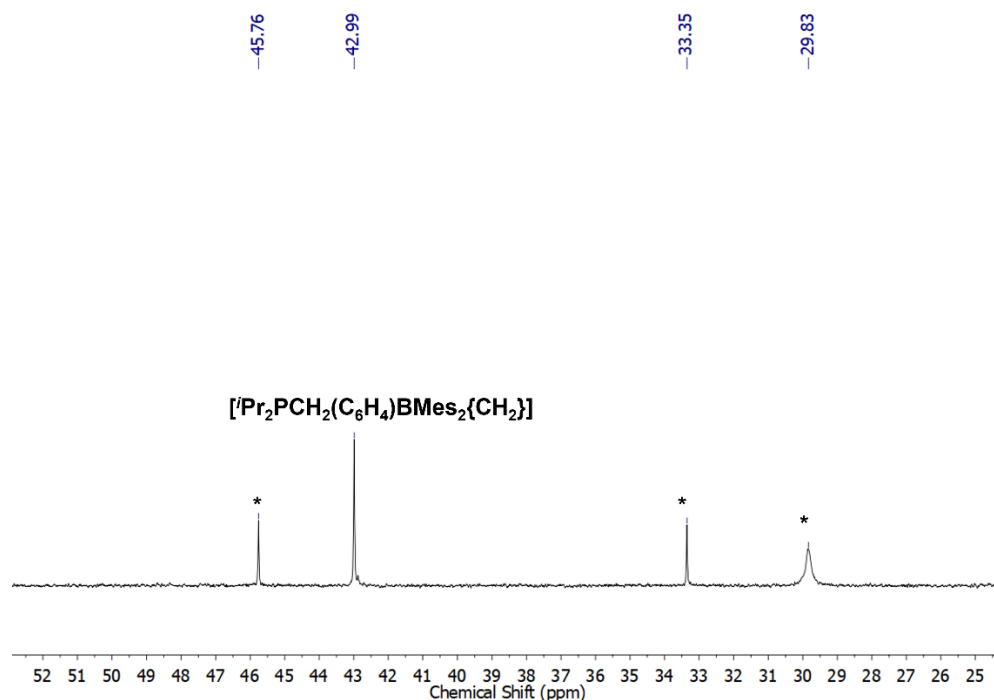

**Figure S66.**  $^{31}\text{P}\{^1\text{H}\}$  NMR spectrum of the crude reaction mixture from the combination of  $[\text{iPr}_2\text{PCH}_2(\text{C}_6\text{H}_4)\text{BMes}_2\{\text{CH}_2\}]$  (**13**) with  $n\text{BuLi}$  in  $\text{C}_6\text{D}_6$ . Peaks labelled with an asterisk (\*) are unknown.

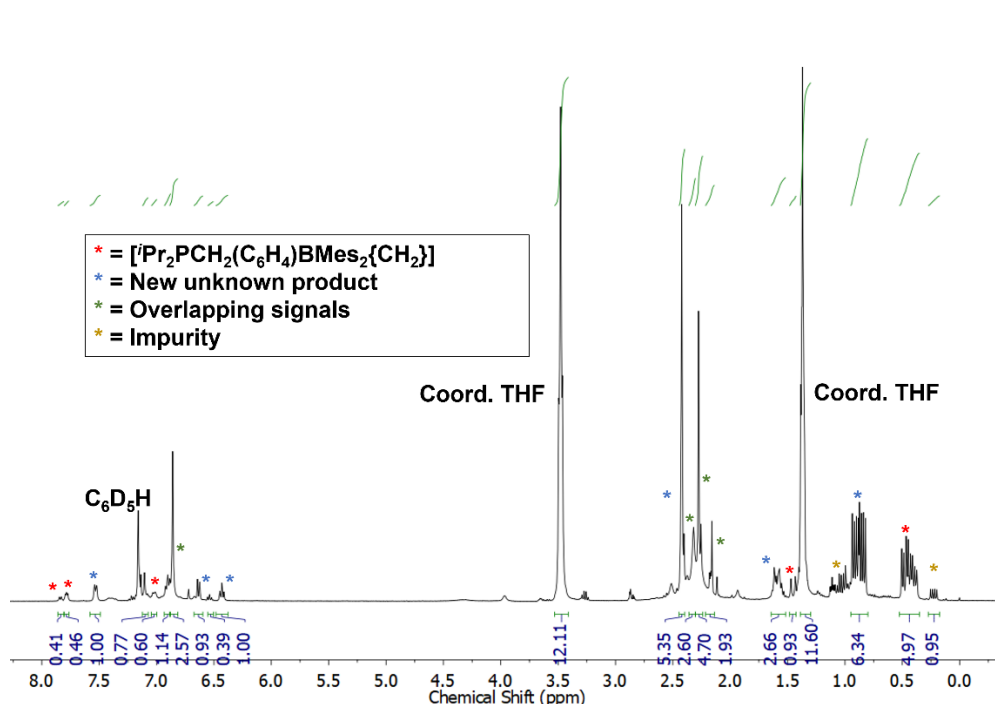

**Figure S67.**  $^1\text{H}$  NMR spectrum of the crude reaction mixture from the combination of  $[\text{Pr}_2\text{PCH}_2(\text{C}_6\text{H}_4)\text{BMes}_2\{\text{CH}_2\}]$  (**13**) with  $n\text{BuLi}$  in  $\text{C}_6\text{D}_6$ .  $^1\text{H}$  integration was performed between the ArH resonance at 7.78 ppm (pseudo-t, for **13**) and 7.54 ppm (d, for unknown new product), showing 31.5 % of **13** in the reaction mixture. To obtain accurate  $^1\text{H}$  NMR integrations, all peaks were linearly corrected to account for baseline fluctuations.



### 3. Density functional theory (DFT) computations

Structure geometries were optimized in the gas phase using the M06-2X<sup>S8</sup> functional and the cc-pVTZ<sup>S9</sup> basis set using Gaussian16.<sup>S10</sup> Frequency analyses were performed to confirm the presence of no imaginary frequencies for ground states. Optimized geometries and orbitals were rendered using VMD.<sup>S11</sup> NBO analysis was performed at the M06-2X/cc-pVTZ level of theory using the NBO 6.0 program.<sup>S12</sup>

To obtain an estimate of the collective P–E and B–E bond strengths within our FLP-stabilized SiCl<sub>2</sub>, SiBr<sub>2</sub>, and GeCl<sub>2</sub> adducts, computations were performed on the release of singlet<sup>S13</sup> EX<sub>2</sub> (E = Si, Ge; X = Cl, Br) from **1**, **2** and **5** in the gas phase.† The free energy of activation ( $\Delta G^\ddagger$ ) associated with EX<sub>2</sub> loss cannot be discussed at this time since transition states for P–E/E–B bond scission could not be located. For both **1** and **5**, the propensity to release singlet<sup>S13</sup> SiX<sub>2</sub> (X = Cl for **1**, Br for **5**) and generate free **PB** appears to be identical in magnitude and endoergic ( $\Delta G$ ) by 20.3 kcal mol<sup>-1</sup>, respectively, in the gas phase (computations at a M06-2X/cc-pVTZ level of theory; Eqn. S1). It is expected that the P–Ge and Ge–B bonds in [PB{GeCl<sub>2</sub>}] (**2**) should be easier to break versus the P–Si and Si–B linkages in [PB{SiCl<sub>2</sub>}] (**1**). Accordingly, the free energy penalty ( $\Delta G$ ) associated with the release of singlet GeCl<sub>2</sub> from [PB{GeCl<sub>2</sub>}] (**2**) was computed to be lower than the loss of SiX<sub>2</sub> from either **1** or **5** by 8.4 kcal mol<sup>-1</sup> (Eqn. S2).

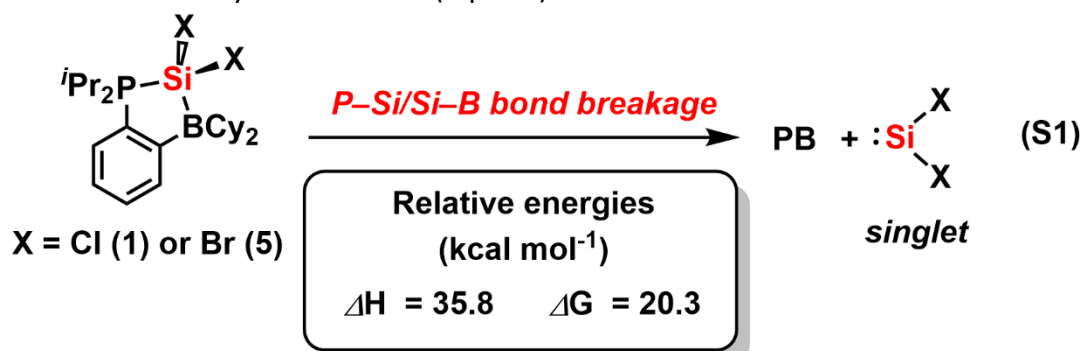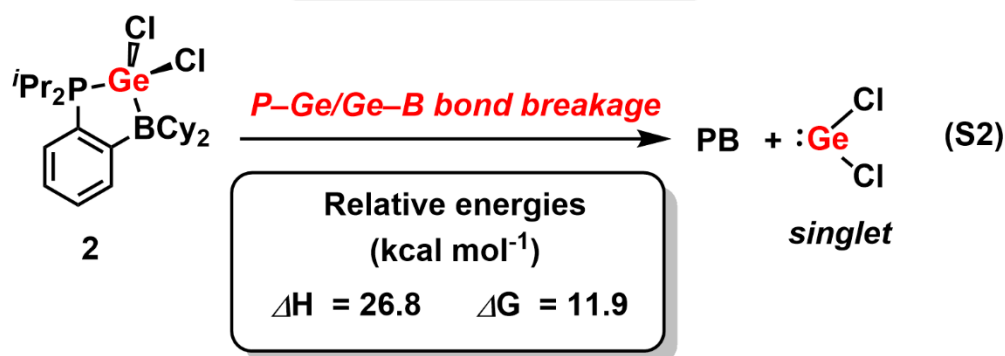

All attempts to optimize [PB{C}] in a singlet ground state (at the M06-2X/cc-pVTZ level of theory) converged into a 1,3-cyclohexyl shift product, [ ${}^1\text{Pr}_2\text{P}(\text{C}_6\text{H}_4)\text{BCy}\{\text{CCy}\}$ ]; however, by using the optimized geometry of the triplet [PB{C}] and running a frequency optimization as a singlet, the total energy of the singlet [PB{C}] complex was obtained. The triplet ground state of [PB{C}] could be optimized and the triplet structure of [PB{C}] is included below (Fig. S69). The triplet [PB{C}] structure is lower in Gibbs free energy by 16.8 kcal mol<sup>-1</sup> than the singlet [PB{C}] structure (Figs. S69 and S70). The 1,3-cyclohexyl shift product, [ ${}^1\text{Pr}_2\text{P}(\text{C}_6\text{H}_4)\text{BCy}\{\text{CCy}\}$ ], is lower in free energy by 76.7 kcal mol<sup>-1</sup> compared to the triplet [PB{C}] structure (Figs. S68 and S70). Both the *cis*- and *trans*- structures of [PB{C=C}PB] were computationally optimized as singlet ground states at a M06-2X/cc-pVTZ level of theory. Energetically, the *trans*-[PB{C=C}PB] structure was favored by -20.9 kcal mol<sup>-1</sup> in Gibbs free energy over the *cis*-[PB{C=C}PB] structure (Fig. S71).

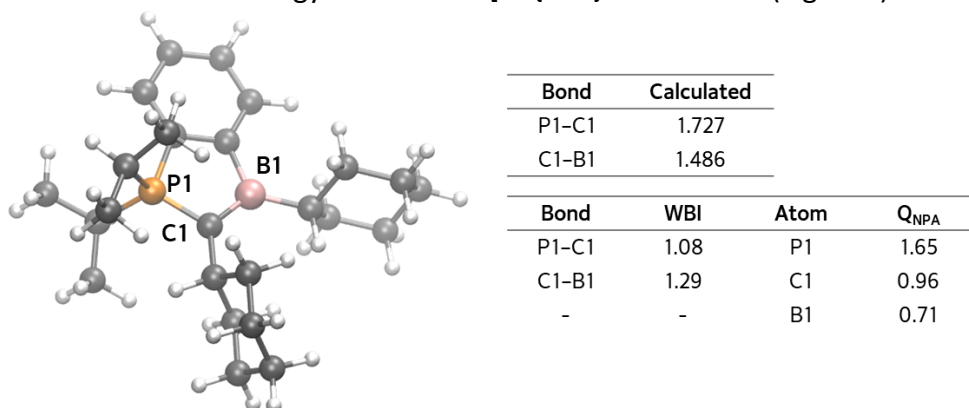

**Figure S68.** Optimized [ ${}^1\text{Pr}_2\text{P}(\text{C}_6\text{H}_4)\text{BCy}\{\text{CCy}\}$ ] structure (at the M06-2X/cc-pVTZ level of theory) with selected bond lengths (Å), Wiberg bond indices (WBI) and natural charges (Q<sub>NPA</sub>).

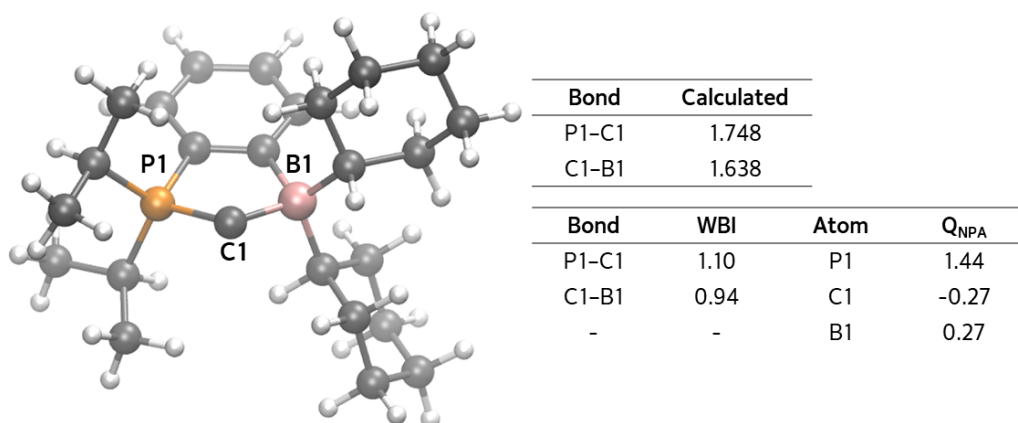

**Figure S69.** Optimized triplet ground state of [PB{C}] (at the M06-2X/cc-pVTZ level of theory) with selected bond lengths (Å), Wiberg bond indices (WBI) and natural charges (Q<sub>NPA</sub>).

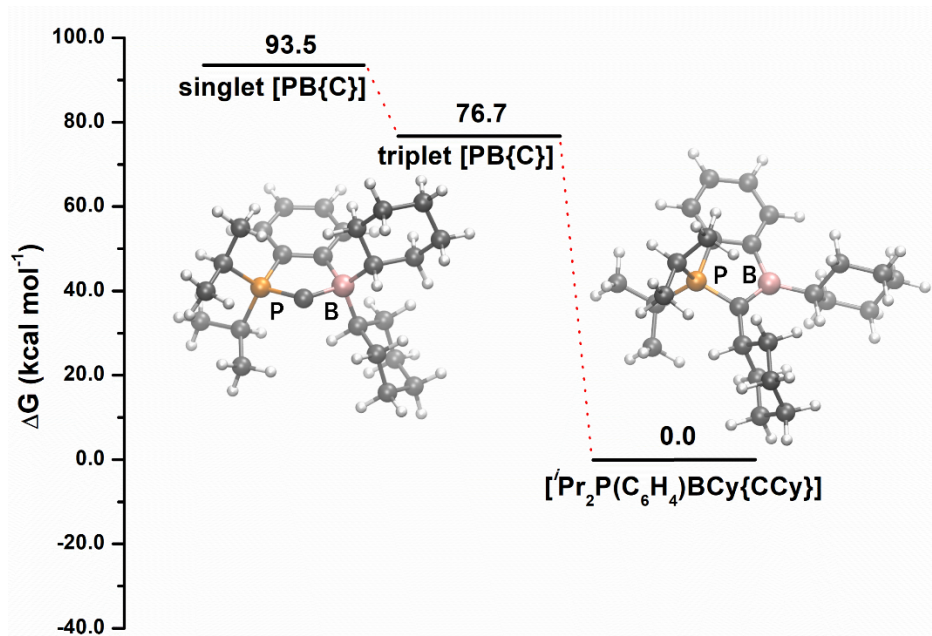

**Figure S70.** Optimized structures of [PB{C}] (singlet and triplet states) and [<sup>i</sup>Pr<sub>2</sub>P(C<sub>6</sub>H<sub>4</sub>)BCy{CCy}] (at the M06-2X/cc-pVTZ level of theory) on a Gibbs free energy diagram (kcal mol<sup>-1</sup>).

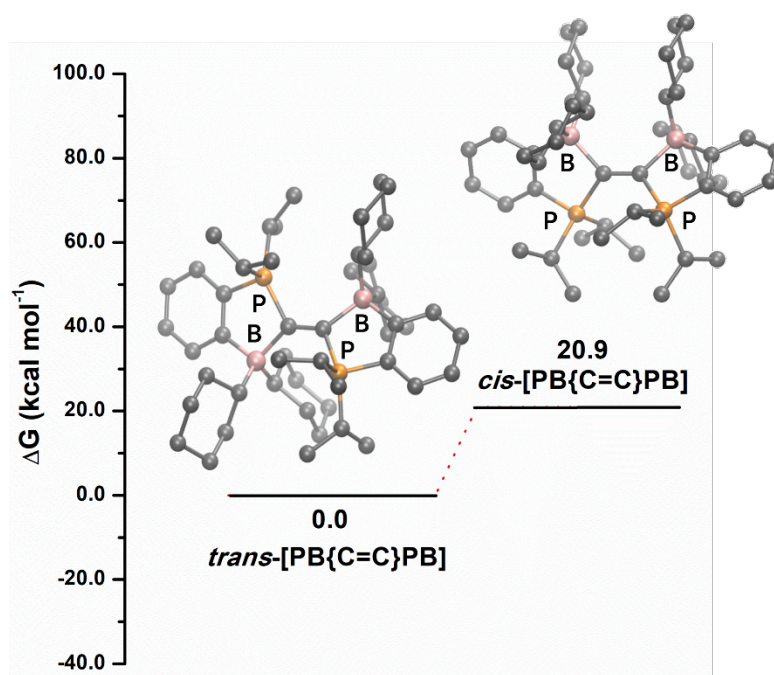

**Figure S71.** Optimized structures of [PB{C=C}PB] (singlet ground state; at the M06-2X/cc-pVTZ level of theory) on a Gibbs free energy diagram (kcal mol<sup>-1</sup>). All hydrogens have been removed for clarity.

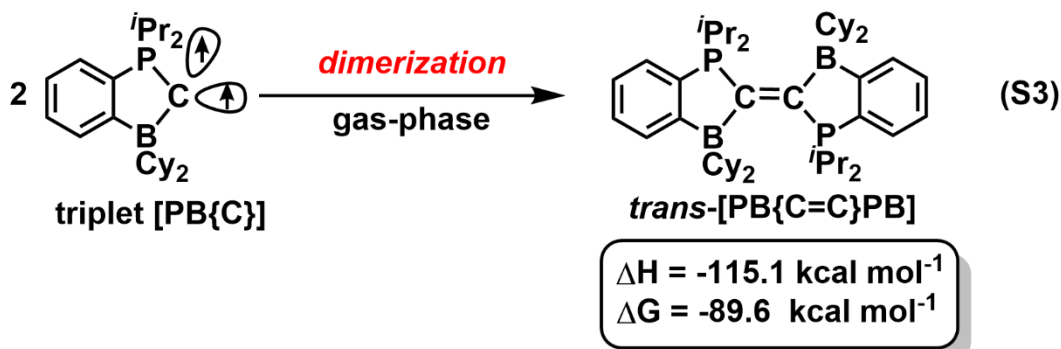

The enthalpy and Gibbs free energy of the dimerization reaction (shown as Eqn. S3 above) were computed to be -115.1 and -89.6 kcal/mol, respectively.

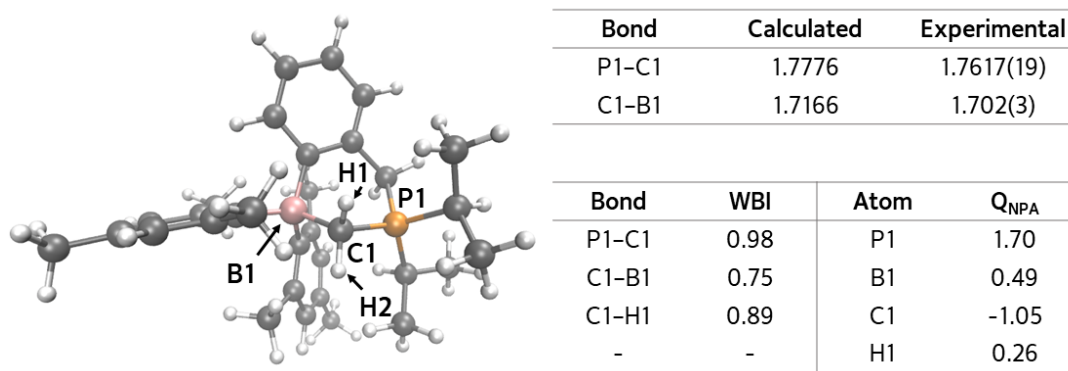

**Figure S72.** Optimized [<sup>i</sup>Pr<sub>2</sub>PCH<sub>2</sub>(C<sub>6</sub>H<sub>4</sub>)BMes<sub>2</sub>{CH<sub>2</sub>}] structure (at the M06-2X/cc-pVTZ level of theory) with selected bond lengths (Å), Wiberg bond indices (WBI) and natural charges (Q<sub>NPA</sub>).

## 4. References

- S1. R. H. Blessing, *Acta Cryst.*, 1995, **A51**, 33–38.
- S2. G. M. Sheldrick, *Acta Cryst.*, 2015, **A71**, 3–8.
- S3. G. M. Sheldrick, *Acta Cryst.*, 2015, **C71**, 3–8.
- S4. O. V. Dolomanov, L. J. Bourhis, R. J. Gildea, J. A. K. Howard and H. Puschmann, *J. Appl. Cryst.*, 2009, **42**, 339–341.
- S5. A. C. Filippou, O. Chernov and G. Schnakenburg, *Angew. Chem., Int. Ed.*, 2009, **48**, 5687–5690.
- S6. S. Aime, R. K. Harris, E. M. McVicker, and M. Fild, *J. Chem. Soc., Dalton Trans.*, 1976, 2144–2153.
- S7. A. A. Omaña, R. K. Green, R. Kobayashi, Y. He, E. R. Antoniuk, M. J. Ferguson, Y. Zhou, J. G. C. Veinot, T. Iwamoto, A. Brown and E. Rivard, *Angew. Chem., Int. Ed.*, 2021, **60**, 228–231.
- S8. Y. Shao and D. Truhlar, *Theor. Chem. Acc.*, 2008, **120**, 215–241.
- S9. T. H. Dunning Jr., *J. Chem. Phys.*, 1989, **90**, 1007–1023.
- S10. M. J. Frisch, G. W. Trucks, H. B. Schlegel, G. E. Scuseria, M. A. Robb, J. R. Cheeseman, G. Scalmani, V. Barone, G. A. Petersson, H. Nakatsuji, X. Li, M. Caricato, A. V. Marenich, J. Bloino, B. G. Janesko, R. Gomperts, B. Mennucci, H. P. Hratchian, J. V. Ortiz, A. F. Izmaylov, J. L. Sonnenberg, D. Williams-Young, F. Ding, F. Lipparini, F. Egidi, J. Goings, B. Peng, A. Petrone, T. Henderson, D. Ranasinghe, V. G. Zakrzewski, J. Gao, N. Rega, G. Zheng, W. Liang, M. Hada, M. Ehara, K. Toyota, R. Fukuda, J. Hasegawa, M. Ishida, T. Nakajima, Y. Honda, O. Kitao, H. Nakai, T. Vreven, K. Throssell, J. A. Montgomery, Jr., J. E. Peralta, F. Ogliaro, M. J. Bearpark, J. J. Heyd, E. N. Brothers, K. N. Kudin, V. N. Staroverov, T. A. Keith, R. Kobayashi, J. Normand, K. Raghavachari, A. P. Rendell, J. C. Burant, S. S. Iyengar, J. Tomasi, M. Cossi, J. M. Millam, M. Klene, C. Adamo, R. Cammi, J. W. Ochterski, R. L. Martin, K. Morokuma, O. Farkas, J. B. Foresman and D. J. Fox, *Gaussian 16*, Revision A. 03, Gaussian Inc., Wallingford CT, 2016.
- S11. W. Humphrey, A. Dalke and K. Schulten, *J. Mol. Graphics*, 1996, **14**, 33–38.
- S12. E. D. Glendening, J. K. Badenhoop, A. E. Reed, J. E. Carpenter, J. A. Bohmann, C. M. Morales, C. R. Landis and F. Weinhold, *NBO 6.0*, Theoretical Chemistry Institute, University of Wisconsin, Madison WI, 2013.
- S13. (a) J. L. Berkowitz, J. P. Green, H. Cho and R. Ruscic, *J. Chem. Phys.*, 1987, **86**, 1235–1248; (b) Y. Apeloig, R. Pauncz, M. Karni, R. West, W. Steiner and D. Chapman, *Organometallics*, 2003, **22**, 3250–3256; (c) S. K. Shin, W. A. Goddard III and J. L. Beauchamp, *J. Phys. Chem.*, 1990, **94**, 6963–6969; (d) J.-C. Barthelat, B. S. Roch, G. Trinquier and J. Satgé, *J. Am. Chem. Soc.*, 1980, **102**, 4080–4085.
